# Supplementary material
Source: MDPI journal article supplement (https://www.mdpi.com/2311-7524/8/2/165)
Supplement: s1 [file s1]

Archive with 3 entries (3 files):
- Figures S1 and S2.pdf
- Table S1.xlsx
- Table S2.xlsx
