# Supplementary material
Source: MDPI journal article supplement (https://www.mdpi.com/2311-7524/8/2/165)
Supplement: s1 [file s1 › Figures S1 and S2.pdf]

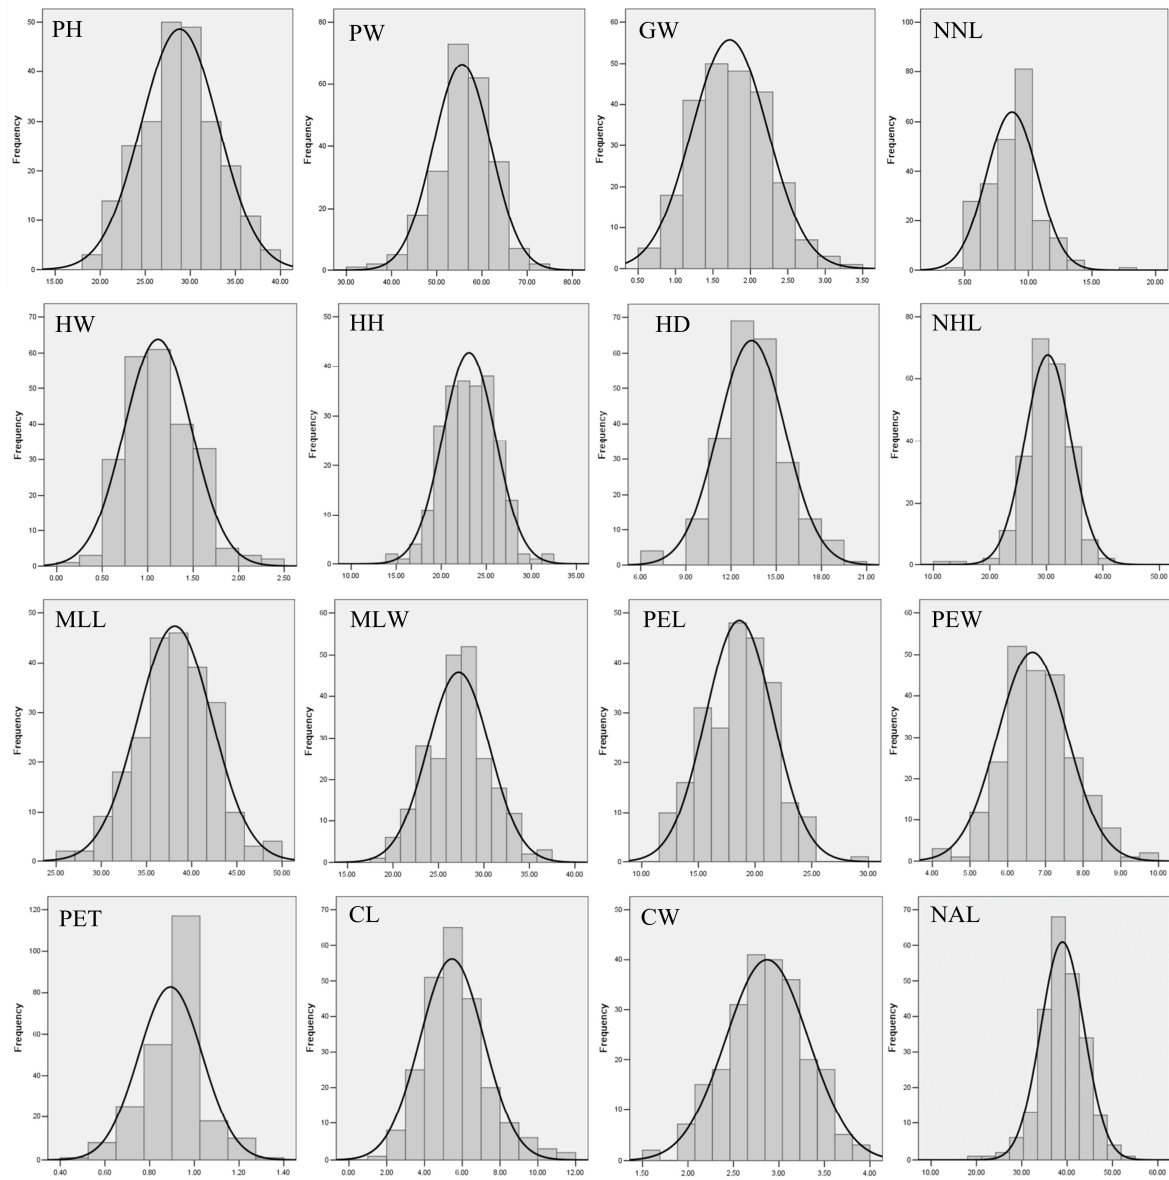

**Figure S1.** Frequency distribution of agricultural traits for the F2 population derived from a cross between G291 and ZHB. PH: plant height, PW: plant width, GW: gross weight, NNL: number of non-wrapper leaves, HW: head weight, HH: head height, HD: head diameter, NHL: number of head leaves, NAL: number of all leaves, MLL: maximum leaf length, MLW: maximum leaf width, PEL: petiole length, PEW: petiole width, PET: petiole thickness, SL: stem length, and SW: stem width.

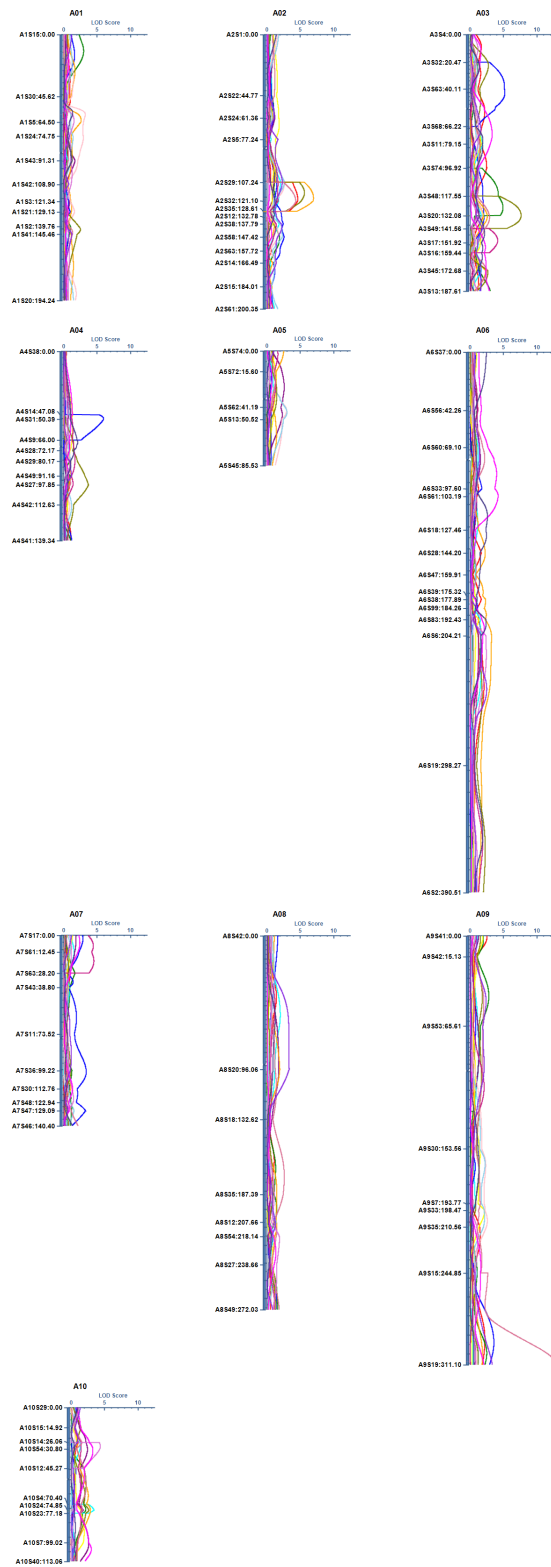

**Figure S2.** Brassica rapa genetic linkage map and QTLs for agronomic traits discovered in F2 lines with LOD score.
