# Supplementary material
Source: MDPI journal article supplement (https://www.mdpi.com/2311-7524/8/2/165)
Supplement: s1 [file s1 › Table S1.xlsx]

## Sheet: Sheet1
Table s1 Details of the 500 SSRs used in this study.
Marker name	Marker name [36]	Motif	Type	Size	Forward primer (5'-3')	Tm(℃)	Reverse primer (5'-3')	Tm(℃)	Product size (bp)	Genes	Chromosome	Start	End	Gene_id	KEGG Orthology	GO Component	GO Function	GO Process	Blast nr
A1S38	BrScaffold000011_2201	(AT)13	p2	26	TTGGAACCATCTCAAGGACC	59.903	CTTACGTTGTGCTGCCAAAA	59.911	182	Bra011885	A01	78912	82518	Bra011885	K11498|1|0.0|538|brp:103864107|centromeric protein E	GO:0016020//membrane	GO:0003774//motor activity	-	gi|685256025|ref|XP_009140424.1|/0/PREDICTED: kinesin-like protein NACK1 [Brassica rapa]
A1S18	BrScaffold000011_1999	(CT)14	p2	28	AATGGTTTTCAGATGGCTCG	60.074	TGGTTGGTGCAGACTTACGA	60.301	222	Bra011813	A01	405770	406452	Bra011813	K11253|1|8e-57|192|mtr:MTR_4g097170|histone H3	GO:0043229//intracellular organelle	GO:0003676//nucleic acid binding	-	gi|357476499|ref|XP_003608535.1|/4.03992e-56/Histone H3 [Medicago truncatula]
A1S1	BrScaffold000011_1899	(AGTTT)4	p5	20	TCTCACGAACCAGTCTGCTG	60.178	GATTGCGGTTGCTTCAGATT	60.221	219	Bra011778	A01	596037	598492	Bra011778	K14682|1|0.0|543|brp:103858470|amino-acid N-acetyltransferase [EC:2.3.1.1]	GO:0044424	GO:0008080//N-acetyltransferase activity	GO:0006525//arginine metabolic process	gi|674958276|emb|CDX75668.1|/0/BnaA01g00340D [Brassica napus]
A1S19	BrScaffold000011_1838	(AT)12(TTAT)4	c	40	TGTCGGCAAGTTTTATGCTC	58.92	TGGGTGGGGTTTCTTTGTTA	60.198	226	Bra011756	A01	716648	719989	Bra011756	K00517|1|2e-180|407|brp:103861008|	GO:0043231//intracellular membrane-bounded organelle	GO:0016491//oxidoreductase activity;GO:0005506//iron ion binding	GO:0008152//metabolic process	gi|685256346|ref|XP_009136992.1|/1.06504e-179/PREDICTED: cytochrome P450 81D11 [Brassica rapa]
A1S40	BrScaffold000011_1715	(GCG)5	p3	15	TGCTGATTCGTGGATGGATA	60.033	CGTTTTCACCACCTCGATCT	60.111	217	Bra011710	A01	941249	942351	Bra011710	-	-	-	-	gi|685256453|ref|XP_009141598.1|/2.22267e-168/PREDICTED: uncharacterized protein LOC103865519 [Brassica rapa]
A1S41	BrScaffold000011_1660	(CTT)10	p3	30	TGGAGCAACAACCTGTGAAG	59.873	GTGGTGAGGGAAGGAGTTGA	60.088	198	Bra011690	A01	1038663	1041058	Bra011690	K08332|1|5e-21|103|ppp:PHYPADRAFT_145951|vacuolar protein 8	-	-	-	gi|685256494|ref|XP_009143836.1|/0/PREDICTED: U-box domain-containing protein 5-like [Brassica rapa]
A1S20	BrScaffold000011_1500	(CAC)7	p3	21	TCCTCTTCCCATTCAACGTC	60.05	ACACCCAGCAAGCAGAAGAT	59.874	217	Bra011623	A01	1369091	1370429	Bra011623	K18490|1|3e-34|146|mdm:103400993|homeobox protein OTX2;K01535|3|3e-09|63.9|obr:102715415|H+-transporting ATPase [EC:3.6.3.6]	GO:0043231//intracellular membrane-bounded organelle	GO:0001071//nucleic acid binding transcription factor activity	GO:0006351//transcription, DNA-templated	gi|685256672|ref|XP_009152034.1|/1.25941e-70/PREDICTED: WUSCHEL-related homeobox 13-like [Brassica rapa]
A1S2	BrScaffold000011_1442	(TTG)5	p3	15	TTTCTCCAACGCTCACTGAA	59.566	CAAACCAAACCTCAAGGGAA	59.942	273	Bra011598	A01	1475484	1477921	Bra011598	K13506|1|1e-81|152|egu:105035034|glycerol-3-phosphate O-acyltransferase 3/4 [EC:2.3.1.15]	GO:0043231//intracellular membrane-bounded organelle;GO:0016020//membrane	GO:0016747//transferase activity, transferring acyl groups other than amino-acyl groups	GO:0006641//triglyceride metabolic process;GO:0046339//diacylglycerol metabolic process	gi|720037761|ref|XP_010267776.1|/3.05941e-87/PREDICTED: glycerol-3-phosphate acyltransferase 3-like [Nelumbo nucifera]
A1S21	BrScaffold000011_1255	(AG)17	p2	34	CATCGAATTCAAGAGCTCCC	59.773	CGCCGGCTTAGAGAGTTATG	59.996	190	Bra011530	A01	1810147	1811214	Bra011530	K15901|1|5e-31|61.2|brp:103838263|EKC/KEOPS complex subunit CGI121/TPRKB	GO:0043231//intracellular membrane-bounded organelle	-	-	gi|674958039|emb|CDX75431.1|/2.72842e-30/BnaA01g02710D [Brassica napus]
A1S3	BrScaffold000011_1070	(GAT)8	p3	24	CGCAAGGAAAGAGAAACTGG	59.986	CGCATACAACCTGACTGTGG	60.175	224	Bra011435	A01	2175784	2181050	Bra011435	-	-	-	-	gi|674957955|emb|CDX75347.1|/0/BnaA01g03550D [Brassica napus]
A1S4	BrScaffold000011_884	(CAA)5catcaaaaccaaccaacttctcaacagcagcaacaacagcagcaggcagcgcctcaacaccagcaacagccaacacca(CAG)5	c	108	ACAGCAGCAGCAACAACAAC	60.104	TCCATCTCTCCTCTGTGGCT	59.945	268	Bra011355	A01	2576143	2581227	Bra011355	K14963|1|2e-41|109|zma:100217300|COMPASS component SWD3;K06674|4|4e-21|105|mdm:103417847|structural maintenance of chromosome 2;K12662|5|6e-09|42.4|mdm:103431048|U4/U6 small nuclear ribonucleoprotein PRP4	-	GO:0046983//protein dimerization activity	GO:0009791//post-embryonic development;GO:0006355//regulation of transcription, DNA-templated	gi|674957862|emb|CDX75254.1|/0/BnaA01g04480D [Brassica napus]
A1S42	BrScaffold000011_870	(AT)7	p2	14	TGTCGTGGTTAAGCATTCCC	60.894	TGGGATCCAAACACTGAATG	59.343	210	Bra011352	A01	2599573	2600740	Bra011352	K03661|1|1e-50|112|ath:AT4G32530|V-type H+-transporting ATPase 21kDa proteolipid subunit	GO:0033176//proton-transporting V-type ATPase complex;GO:0043231//intracellular membrane-bounded organelle;GO:0031224//intrinsic component of membrane	GO:0015077//monovalent inorganic cation transmembrane transporter activity;GO:0005488;GO:0017111//nucleoside-triphosphatase activity	GO:0015988//energy coupled proton transmembrane transport, against electrochemical gradient	gi|186515568|ref|NP_001119099.1|/5.75565e-50/ATPase, F0/V0 complex, subunit C protein [Arabidopsis thaliana]
A1S43	BrScaffold000011_526	(TA)6	p2	12	ATGGGGTTCTGAAGTTCCCT	59.8	GGCACGAGGACTGATTTCAT	60.12	246	Bra011231	A01	3182288	3182299	Bra011231	-	-	-	-	gi|218196473|gb|EEC78900.1|/3.79027e-105/hypothetical protein OsI_19281 [Oryza sativa Indica Group]
A1S24	BrScaffold000011_224	(TA)8	p2	16	GGAAGCCCCTCTTTTTACCA	60.423	GAGCGTGCATTTAAATCGAGA	60.358	224	Bra011090	A01	3925172	3929858	Bra011090	-	-	GO:0001071//nucleic acid binding transcription factor activity	GO:0032501//multicellular organismal process	gi|685258050|ref|XP_009128929.1|/2.45272e-90/PREDICTED: uncharacterized protein LOC103853758 isoform X3 [Brassica rapa]
A1S5	BrScaffold000011_30	(TGT)5tctctgatctcatgaaagcaactt(CTG)5	c	54	CCAACAGCTCCACCGTTACT	60.171	TCAGAGATCAGGTTCCAGGG	60.191	201	Bra011042	A01	4276343	4278188	Bra011042	K14317|1|1e-06|39.7|mus:103984394|nuclear pore complex protein Nup214	GO:0043231//intracellular membrane-bounded organelle	GO:0016830//carbon-carbon lyase activity	GO:0009411//response to UV;GO:0009267//cellular response to starvation;GO:0006290//pyrimidine dimer repair;GO:0006351//transcription, DNA-templated	gi|685258184|ref|XP_009129517.1|/2.88375e-102/PREDICTED: protein PHR1-LIKE 1 [Brassica rapa]
A1S44	BrScaffold000190_63	(AC)7	p2	14	CCTTGGAGATCTCTGGCTTG	59.943	TCAGATGTATCGGACCATCAA	58.938	217	Bra040176	A01	4498990	4502576	Bra040176	-	-	GO:0001071//nucleic acid binding transcription factor activity	GO:0006351//transcription, DNA-templated	gi|685258402|ref|XP_009130900.1|/1.04819e-69/PREDICTED: probable transcription factor KAN3 [Brassica rapa]
A1S45	BrScaffold000014_84	(CAA)6	p3	18	GTTTCCGACAAGCCCAACTA	60.11	TTGTTGCTGGTGTTGGTGAT	60.008	143	Bra013287	A01	4752377	4755786	Bra013287	-	-	-	-	gi|685258503|ref|XP_009131438.1|/0/PREDICTED: flocculation protein FLO11 [Brassica rapa]
A1S46	BrScaffold000014_243	(GAT)5	p3	15	CAAACCGTGCAAAACAGAGA	59.881	CGAATGTTTCAAACTCCGGT	59.971	279	Bra013335	A01	5064818	5066363	Bra013335	-	-	GO:0005488	-	gi|685258627|ref|XP_009132049.1|/0/PREDICTED: uncharacterized protein LOC103856682 [Brassica rapa]
A1S47	BrScaffold000014_442	(TGA)5	p3	15	CGGAAGCGATTCTCTAGTGG	59.971	GCTAGAGCCGAAGCAGAGAA	60	155	Bra013406	A01	5483251	5483819	Bra013406	K09419|1|3e-12|65.5|sot:102593932|heat shock transcription factor, other eukaryote	-	-	-	gi|685258860|ref|XP_009132988.1|/2.15745e-74/PREDICTED: heat stress transcription factor A-4a-like [Brassica rapa]
A1S48	BrScaffold000014_593	(GA)6	p2	12	GACAAAACGGGTTCGATCAT	59.797	ATCCTTGGCCACTCTGTCAC	60.12	151	Bra013453	A01	5768763	5771648	Bra013453	-	-	-	-	gi|685258995|ref|XP_009133614.1|/3.21809e-76/PREDICTED: serine/threonine-protein kinase pakA-like isoform X1 [Brassica rapa]
A1S6	BrScaffold000014_613	(TCATCC)3(TCC)4*	c*	27	ATGTGCGTTGTGCGTTATGT	60.065	ACCTGGGACAAGGTTGACAG	60.002	279	Bra013460	A01	5818906	5820084	Bra013460	K12191|1|7e-17|81.3|csv:101208440|charged multivesicular body protein 2A	-	-	-	gi|685259035|ref|XP_009133770.1|/4.78008e-36/PREDICTED: protein LSD1 isoform X3 [Brassica rapa]
A1S27	BrScaffold000014_756	(TCT)6ccttctttgttaa(CTT)6	c	49	CGACACATCGCTTCTACTCG	59.615	AGGATGGCGTTGAAGAGAGA	59.95	183	Bra013525	A01	6132014	6136198	Bra013525	K15601|1|0.0|474|brp:103859003|lysine-specific demethylase 3 [EC:1.14.11.-]	-	-	-	gi|685259250|ref|XP_009134735.1|/0/PREDICTED: uncharacterized protein LOC103859003 isoform X1 [Brassica rapa]
A1S49	BrScaffold000014_905	(CA)9	p2	18	ATACTCTCGTTGTGGTCGGG	59.989	GTCTTGTCCGCAAGAGAAGG	59.989	235	Bra013576	A01	6433856	6435594	Bra013576	K00430|1|6e-77|289|brp:103859651|peroxidase [EC:1.11.1.7]	GO:0044464	GO:0005506//iron ion binding;GO:0003824//catalytic activity;GO:0016209//antioxidant activity	GO:0008152//metabolic process;GO:0006950//response to stress	gi|674950623|emb|CDX82887.1|/3.22886e-76/BnaC01g13370D [Brassica napus]
A1S7	BrScaffold000014_1359	(AAG)7	p3	21	TCTCAGACGTTTGCTTGTGG	60.025	GACGACGGTCTCTTCGTCTC	59.993	107	Bra013731	A01	7488743	7490835	Bra013731	K09273|1|2e-101|370|brp:103861435|upstream-binding transcription factor	-	-	-	gi|685259842|ref|XP_009137390.1|/1.38765e-100/PREDICTED: high mobility group B protein 6 [Brassica rapa]
A1S29	BrScaffold000014_1496	(TCA)7	p3	21	CTTTGGAGCATCCTTCCTTG	59.807	TTGTTTGGATGTCGTCGTGT	60.008	194	Bra013798	A01	7797197	7799662	Bra013798	K14485|1|2e-80|301|egr:104426725|transport inhibitor response 1	-	GO:0043178//alcohol binding	GO:0019941//modification-dependent protein catabolic process;GO:0009755//hormone-mediated signaling pathway	gi|685259977|ref|XP_009138011.1|/0/PREDICTED: F-box protein FBX14 [Brassica rapa]
A1S8	BrScaffold000014_1872	(CGA)6(TGA)7	c	39	AGCCGTTGATCTCTTCTCCA	59.95	TGAACAGCAGATGGAGTTGG	59.831	236	Bra013945	A01	8647623	8649208	Bra013945	K14497|1|4e-142|505|brp:103863846|protein phosphatase 2C [EC:3.1.3.16]	GO:0043231//intracellular membrane-bounded organelle;GO:0043234//protein complex	GO:0019900//kinase binding;GO:0046872//metal ion binding;GO:0004721//phosphoprotein phosphatase activity	GO:0010118//stomatal movement;GO:0009767//photosynthetic electron transport chain;GO:0009738//abscisic acid-activated signaling pathway;GO:0006950//response to stress;GO:0006464//cellular protein modification process	gi|685260435|ref|XP_009139861.1|/2.5531e-141/PREDICTED: protein phosphatase 2C 56-like [Brassica rapa]
A1S30	BrScaffold000051_507	(TCT)7tcgtcaccatctgagaaaaggtcagaacccaattcatctccttcatcagactcttcactca(CTT)7	c	103	TTTTCCTCATCGCTACCACC	60.074	GAAGGCGATGAAGTCCCATA	60.036	240	Bra026418	A01	9201093	9204671	Bra026418	K14835|1|3e-78|160|brp:103866374|ribosomal RNA methyltransferase Nop2 [EC:2.1.1.-]	GO:0031981//nuclear lumen	-	GO:0009887//organ morphogenesis	gi|685260878|ref|XP_009142532.1|/1.85845e-77/PREDICTED: putative ribosomal RNA methyltransferase nop2 [Brassica rapa]
A1S9	BrScaffold000051_241	(AAG)4	p3	12	CAACGGAGACGGTCCATAGT	59.989	TTCGGGTCCTTGTCAGAATC	60.05	274	Bra026325	A01	9790998	9792920	Bra026325	-	GO:0009536//plastid	-	-	gi|685261116|ref|XP_009143775.1|/4.33279e-100/PREDICTED: uncharacterized protein LOC103867451 [Brassica rapa]
A1S31	BrScaffold000051_86	(AG)13	p2	26	ATGGAGCAATATGGTCCTGC	59.923	CTGCGGGAGCTGTAAGTTCT	59.639	277	Bra026257	A01	10141953	10143465	Bra026257	K01074|1|5e-132|174|brp:103868109|palmitoyl-protein thioesterase [EC:3.1.2.22]	-	GO:0016790//thiolester hydrolase activity	-	gi|685261267|ref|XP_009144465.1|/2.71696e-131/PREDICTED: palmitoyl-protein thioesterase 1-like [Brassica rapa]
A1S51	BrScaffold000147_126	(CTCTCC)3tttctctttccgttggttctcttcctctctcctcgccgtgagtcccccgagagcaagccgagccgcc(GGT)6	c	103	CGTCAAGCTTCCCTTTTCCT	60.733	ATCTGGTCACCACCACAACA	59.846	228	Bra038497	A01	10645404	10650033	Bra038497	-	-	-	-	gi|685261499|ref|XP_009145614.1|/3.30846e-80/PREDICTED: uncharacterized protein LOC103869305 [Brassica rapa]
A1S10	BrScaffold000147_5	(GA)10	p2	20	GCCACTGTTCTAGGTTCCCA	60.111	GCTGTAGCCGACATCTCTCC	59.981	211	Bra038448	A01	10949028	10962799	Bra038448	K06268|1|2e-62|94.4|ath:AT4G16350|serine/threonine-protein phosphatase 2B regulatory subunit	-	GO:0005488	-	gi|357516227|ref|XP_003628402.1|/0/Dedicator of cytokinesis [Medicago truncatula]
A1S32	BrScaffold000088_240	(GA)17	p2	34	GCGTTATTGGGTTCGACATT	59.829	CACTCTTTCCCCTTCCCAAT	60.298	165	Bra033489	A01	11455026	11470735	Bra033489	K08790|1|4e-166|382|aly:ARALYDRAFT_915442|serine/threonine kinase 38 [EC:2.7.11.1]	GO:0043231//intracellular membrane-bounded organelle;GO:0044444//cytoplasmic part;GO:0016020//membrane	GO:0004672//protein kinase activity;GO:0032559	GO:0006464//cellular protein modification process	gi|685261749|ref|XP_009147066.1|/1.02935e-166/PREDICTED: serine/threonine-protein kinase tricorner-like isoform X1 [Brassica rapa]
A1S53	BrScaffold000131_140	(AT)10	p2	20	GGGGCCTTACCTGGATACAT	60.039	GCGGTGTTCTAACTCACGCT	60.462	199	Bra037627	A01	12929732	12930929	Bra037627	K13024|1|2e-36|153|brp:103858920|inositol-hexakisphosphate/diphosphoinositol-pentakisphosphate 1-kinase [EC:2.7.4.24]	-	-	-	gi|674959591|emb|CDX74296.1|/4.02909e-37/BnaA03g27510D [Brassica napus]
A1S11	BrScaffold000090_212	(TC)8ccgtgcctcgctctgtcacggttacatg(TC)10	c	64	CCACTGAGCGGTAGAGAAGG	60.005	AAGCTTCTTCTCCGTCCTCC	59.957	218	Bra033815	A01	13363683	13365137	Bra033815	-	GO:0009534//chloroplast thylakoid	GO:0022892	GO:0006605//protein targeting	gi|567122945|ref|XP_006390766.1|/2.63503e-09/hypothetical protein EUTSA_v10019116mg [Eutrema salsugineum]
A1S33	BrScaffold000068_358	(CAT)7	p3	21	CATGTTTGGTTGCTACGGTG	60.027	ACCAGTCAAAACCATCTCCG	59.966	278	Bra029974	A01	14889000	14890548	Bra029974	-	-	-	-	gi|685262803|ref|XP_009101436.1|/4.81543e-122/PREDICTED: uncharacterized protein LOC103827655 [Brassica rapa]
A1S54	BrScaffold000068_460	(CTT)4	p3	12	TGCCTGAAGCTACGAACTGA	59.74	TAGGGCCAACAGTGATGACA	60.112	234	Bra030008	A01	15148221	15148595	Bra030008	-	-	-	GO:0033036	gi|685262879|ref|XP_009101803.1|/2.47644e-62/PREDICTED: uncharacterized protein LOC103827977 isoform X2 [Brassica rapa]
A1S12	BrScaffold000105_208	(AAATAA)3aaa(AAAAAT)3aaataaaaataaaaatagtttcagtcagattatatgttttcagattcgaaa(T)14	c	104	CGTTGAAGGGTAAAATGTCCC	60.579	TGGGGTTTTGGAATTAGGGT	60.403	262	Bra035456	A01	15881078	15883145	Bra035456	K16280|1|5e-12|73.9|eus:EUTSA_v10019546mg|E3 ubiquitin-protein ligase RGLG [EC:2.3.2.27]	-	GO:0003676//nucleic acid binding	GO:0048437//floral organ development;GO:0010074//maintenance of meristem identity	gi|685325256|ref|XP_009152152.1|/9.21012e-21/PREDICTED: agamous-like MADS-box protein AGL3 [Brassica rapa]
A1S55	BrScaffold000076_461	(TG)9	p2	18	TTGATGTTCTTGGTGCCTTG	59.691	TCAGCGAGTACAACGCAAAC	60.058	219	Bra031523	A01	16588200	16592605	Bra031523	K03549|1|0.0|466|pop:POPTR_0010s10450g|KUP system potassium uptake protein	-	-	GO:0030001//metal ion transport	gi|566190119|ref|XP_002315805.2|/0/potassium transporter 12 family protein [Populus trichocarpa]
A1S56	BrScaffold000076_370	(GAT)6	p3	18	CAGAAGCATGCTCGTTCTGA	60.287	TGGGTTATCCACTTCGCTTC	60.074	246	Bra031491	A01	16846205	16847426	Bra031491	-	-	-	-	gi|685263299|ref|XP_009103894.1|/8.87548e-24/PREDICTED: histone H2A.Z-specific chaperone CHZ1 isoform X2 [Brassica rapa]
A1S34	BrScaffold000042_59	(TTA)9g(TAT)6taa(TAT)6	c	67	GACAGGAAAAAGGCCATGAA	60.051	AATGAGACAAAGCAACCCGT	59.598	270	Bra023727	A01	18564333	18569973	Bra023727	-	GO:0031224//intrinsic component of membrane	-	GO:0009267//cellular response to starvation	gi|685329013|ref|XP_009102619.1|/1.9573e-164/PREDICTED: phosphate transporter PHO1 isoform X1 [Brassica rapa]
A1S57	BrScaffold000042_395	(TCA)7	p3	21	ATTCGTGGAGCTATCAACGC	60.243	CGACCGCTGATTTATTCGAT	60.06	164	Bra023828	A01	19395156	19397656	Bra023828	-	-	-	-	gi|685264272|ref|XP_009108883.1|/1.25363e-127/PREDICTED: uncharacterized protein LOC103834564 [Brassica rapa]
A1S13	BrScaffold000042_794	(ATG)4caaacaccaaagaatgtagcagcaatgattccgatcccatcaacaccagcaacaatctctgtccccatgcaaactgcaccaaccccact(CAA)5	c	116	GCAACGCAGTGAACGAGATA	60.019	TCAGCCTTTTCAGGGAGAAA	59.926	226	Bra023930	A01	20277267	20280219	Bra023930	K16732|1|0.0|511|brp:103835782|protein regulator of cytokinesis 1	GO:0005881//cytoplasmic microtubule	GO:0015631//tubulin binding	GO:0051707//response to other organism;GO:0031109//microtubule polymerization or depolymerization;GO:0048285;GO:0052093	gi|685264565|ref|XP_009110219.1|/0/PREDICTED: 65-kDa microtubule-associated protein 3 [Brassica rapa]
A1S35	BrScaffold000033_597	(TG)7	p2	14	TTTGGCTTATTTGCGACACA	60.251	TCTAGTGGACTCCGTCCTGC	60.408	277	Bra021277	A01	22009753	22011974	Bra021277	K04730|1|9e-43|176|egu:105039392|interleukin-1 receptor-associated kinase 1 [EC:2.7.11.1];K04733|3|2e-40|168|dosa:Os01t0819100-01|interleukin-1 receptor-associated kinase 4 [EC:2.7.11.1]	GO:0031090//organelle membrane	GO:0016301//kinase activity;GO:0032559	GO:0006464//cellular protein modification process;GO:0007167//enzyme linked receptor protein signaling pathway	gi|685265196|ref|XP_009113711.1|/0/PREDICTED: probable inactive receptor kinase RLK902 [Brassica rapa]
A1S14	BrScaffold000033_182	(TCT)7	p3	21	CTCTCTCGTGCCTATGACCC	59.827	TGCGAGATTAAGGAAGCAGG	60.481	234	Bra021145	A01	22913967	22917284	Bra021145	-	-	GO:0005543//phospholipid binding	GO:0009987//cellular process;GO:0023052//signaling	gi|685265531|ref|XP_009115163.1|/0/PREDICTED: eukaryotic translation initiation factor 5B [Brassica rapa]
A1S36	BrScaffold000034_839	(CGG)5	p3	15	TACAGAGGCGTTAGGAAGCG	60.534	TAGAGGGTGCTGGTCTTGCT	60.012	254	Bra021594	A01	23480616	23481257	Bra021594	K09286|1|7e-89|326|brp:103841638|EREBP-like factor	GO:0044451	GO:0005488;GO:0001071//nucleic acid binding transcription factor activity	GO:0009743//response to carbohydrate;GO:0002218//activation of innate immune response;GO:0006351//transcription, DNA-templated;GO:0009873//ethylene-activated signaling pathway	gi|685265743|ref|XP_009116439.1|/3.82446e-88/PREDICTED: ethylene-responsive transcription factor 4-like [Brassica rapa]
2S2	BrScaffold000034_646	(ATC)4agccatgaccg(ACA)6	c	41	TCGCTTGCAATTGATTTATGA	59.299	AATGGGCAGACATCATCTCC	59.893	278	Bra021527	A01	23909710	23911026	Bra021527	K08064|1|8e-136|184|brp:103842343|nuclear transcription factor Y, alpha	GO:0005667//transcription factor complex	GO:0003676//nucleic acid binding;GO:0001071//nucleic acid binding transcription factor activity	GO:0006950//response to stress	gi|674893705|emb|CDY39091.1|/4.55218e-135/BnaA01g29650D [Brassica napus]
A1S37	BrScaffold000034_564	(CAA)6	p3	18	CCTCCATTACCACCAACCAC	60.088	TTATGGTCAAACTCGGAGGC	60.074	167	Bra021510	A01	24048368	24050780	Bra021510	K12309|1|3e-65|251|egr:104424130|beta-galactosidase [EC:3.2.1.23]	-	GO:0046914//transition metal ion binding;GO:0001071//nucleic acid binding transcription factor activity	GO:0006351//transcription, DNA-templated	gi|685265960|ref|XP_009117441.1|/6.8528e-107/PREDICTED: zinc finger protein NUTCRACKER-like isoform X2 [Brassica rapa]
A1S15	BrScaffold000151_53	(TC)17	p2	34	TTCCGAATCAGATAATCCGC	60.001	AACTTACCATCATCGACGCC	59.962	203	Bra038682	A01	24504207	24508085	Bra038682	K09499|1|1e-99|135|brp:103845970|T-complex protein 1 subunit eta	GO:0044424	GO:0005515//protein binding;GO:0032559	GO:0044267//cellular protein metabolic process;GO:0010038//response to metal ion	gi|685266688|ref|XP_009121137.1|/7.7694e-99/PREDICTED: T-complex protein 1 subunit eta [Brassica rapa]
A1S16	BrScaffold000093_127	(CTC)6	p3	18	CTACGGATCGTCTGGTGGTT	59.989	GAAGCAAGTCACGATGTTCG	59.445	172	Bra034103	A01	24975263	24976619	Bra034103	K13448|1|2e-58|155|brp:103847680|calcium-binding protein CML	-	GO:0046872//metal ion binding	-	gi|720043752|ref|XP_010269664.1|/2.97635e-60/PREDICTED: probable calcium-binding protein CML49 [Nelumbo nucifera]
A1S17	BrScaffold000192_35	(TCT)7	p3	21	GTTTCTTCAACCGCAAAAGC	59.867	AGTTGCTTCCTTTCTGGCAA	59.993	225	Bra040239	A01	25831460	25832161	Bra040239	-	-	-	-	gi|685267686|ref|XP_009124945.1|/4.32745e-86/PREDICTED: uncharacterized protein LOC103849996 [Brassica rapa]
A2S1	BrScaffold000063_612	(TCT)7	p3	21	GCAATCTCTCATCGTTGTCAAG	59.882	ATGGAGGAGGACACAGCAAC	60.12	266	Bra028900	A02	120618	128886	Bra028900	K06100|1|7e-136|150|brp:103850419|symplekin	GO:0005849//mRNA cleavage factor complex	-	GO:0016441//posttranscriptional gene silencing	gi|685268721|ref|XP_009125419.1|/3.86328e-135/PREDICTED: symplekin isoform X1 [Brassica rapa]
A2S17	BrScaffold000063_570	(CGC)4cggaggaaga(AGG)5	c	37	TAGAGGCTCGGGTTTGAAGA	59.948	TTCCCACTTCCACTTTCACC	59.943	262	Bra028883	A02	214591	217897	Bra028883	K15613|1|2e-23|112|pper:PRUPE_ppa006566mg|homeobox protein Meis1	GO:0043231//intracellular membrane-bounded organelle;GO:0044444//cytoplasmic part	GO:0001071//nucleic acid binding transcription factor activity;GO:0003677//DNA binding	GO:0003002//regionalization;GO:0006355//regulation of transcription, DNA-templated;GO:0010074//maintenance of meristem identity;GO:0010346;GO:0048608//reproductive structure development	gi|685268763|ref|XP_009125437.1|/6.41254e-82/PREDICTED: BEL1-like homeodomain protein 9 [Brassica rapa]
A2S18	BrScaffold000063_345	(CTC)7	p3	21	TTCACCGGGAAACAGAGAAC	60.088	GAAGCCTGAGAGTCTGGTGG	59.986	214	Bra028790	A02	660335	662311	Bra028790	K13126|1|3e-11|54.3|fve:101312606|polyadenylate-binding protein;K00162|4|1e-06|55.8|obr:102719045|pyruvate dehydrogenase E1 component beta subunit [EC:1.2.4.1];K05941|5|8e-06|53.1|mdm:103435918|glutathione gamma-glutamylcysteinyltransferase [EC:2.3.2.15]	GO:0043231//intracellular membrane-bounded organelle	GO:0001071//nucleic acid binding transcription factor activity	GO:0009642//response to light intensity;GO:0009813//flavonoid biosynthetic process;GO:0006355//regulation of transcription, DNA-templated;GO:0032501//multicellular organismal process	gi|685269065|ref|XP_009125558.1|/1.00879e-106/PREDICTED: NAC domain-containing protein 78-like isoform X1 [Brassica rapa]
A2S19	BrScaffold000063_239	(CTC)5	p3	15	CGCAGAGAAGATGATGACGA	60.096	AGAGAAGGGGCAAAAGGGTA	60.068	220	Bra028742	A02	897599	899094	Bra028742	-	-	GO:0005515//protein binding	GO:0044267//cellular protein metabolic process	gi|674232250|gb|KFK25015.1|/4.37031e-104/hypothetical protein AALP_AA8G055600 [Arabis alpina]
A2S20	BrScaffold000063_50	(ATG)8	p3	24	TAAAGAGTTCGAGGGGCAAA	59.817	CACTGGCTCTTTGGACTGGT	60.298	233	Bra028660	A02	1270599	1272859	Bra028660	K07407|1|8e-115|188|aly:ARALYDRAFT_487672|alpha-galactosidase [EC:3.2.1.22]	-	GO:0016798//hydrolase activity, acting on glycosyl bonds	GO:0008152//metabolic process	gi|297810943|ref|XP_002873355.1|/4.66485e-114/alpha-galactosidase 1 [Arabidopsis lyrata subsp. lyrata]
A2S21	BrScaffold000041_97	(CCA)4atcacggccaagctgccggcgagtt(TGC)4	c	49	ACGGTAACGGAACAGCAAAC	60.037	GGGCGGTAGATCACGTACAC	60.406	229	Bra023348	A02	1922464	1925528	Bra023348	-	-	-	-	gi|685269671|ref|XP_009125834.1|/4.44423e-122/PREDICTED: uncharacterized protein LOC103850799 [Brassica rapa]
2S3	BrScaffold000041_285	(GCT)6	p3	18	TGCTGCAAAACATCACACAA	59.877	CGCCGAGTGAAGAAGAGAAC	60.134	263	Bra023416	A02	2251436	2255609	Bra023416	K15542|1|6e-105|146|brp:103850872|polyadenylation factor subunit 2	GO:0031461//cullin-RING ubiquitin ligase complex	GO:0005488	GO:0009908//flower development	gi|685269820|ref|XP_009125914.1|/3.62023e-104/PREDICTED: flowering time control protein FY-like isoform X1 [Brassica rapa]
A2S22	BrScaffold000041_627	(AT)13	p2	26	CGTGTACTTCAACTTTTCCGC	59.799	ACCCGATTGGCACAATACAT	60.081	137	Bra023570	A02	2932212	2943245	Bra023570	K13379|1|1e-58|231|brp:103846324|reversibly glycosylated polypeptide / UDP-arabinopyranose mutase [EC:2.4.1.- 5.4.99.30]	GO:0043231//intracellular membrane-bounded organelle	-	GO:0001708//cell fate specification;GO:0009943//adaxial/abaxial axis specification;GO:0009653//anatomical structure morphogenesis;GO:0048437//floral organ development	gi|685270202|ref|XP_009126120.1|/1.32127e-105/PREDICTED: transcription repressor KAN1-like isoform X2 [Brassica rapa]
A2S3	BrScaffold000041_761	(ATC)7	p3	21	CTGTCGTCTGCGTCGATTAG	59.615	TCGTTCATACGCAAGTGGAG	59.864	243	Bra023620	A02	3198771	3200195	Bra023620	K00604|1|6e-92|338|pxb:103961028|methionyl-tRNA formyltransferase [EC:2.1.2.9]	GO:0043231//intracellular membrane-bounded organelle	-	-	gi|685270331|ref|XP_009126188.1|/8.78602e-122/PREDICTED: uncharacterized protein LOC103851110 [Brassica rapa]
A2S23	BrScaffold000030_122	(GGA)4ggctggtttgga(GGC)5	c	39	AGAAGAATCCGGTGATGACG	60.073	CTGCCAACCATTACAAACCA	59.439	225	Bra020087	A02	3952200	3953619	Bra020087	-	-	-	-	gi|685270791|ref|XP_009126425.1|/3.39596e-50/PREDICTED: uncharacterized protein LOC103851329 [Brassica rapa]
A2S24	BrScaffold000030_615	(TCT)6	p3	18	CCTTGTGTCCCTCTCTGGAA	60.229	TCAGATGGATGAATCGGTGA	60.006	237	Bra020262	A02	4891398	4893393	Bra020262	K09284|1|2e-58|114|aly:ARALYDRAFT_673601|AP2-like factor, euAP2 lineage	-	-	-	gi|297831404|ref|XP_002883584.1|/8.68383e-58/predicted protein [Arabidopsis lyrata subsp. lyrata]
A2S5	BrScaffold000030_801	(AG)10	p2	20	ACAGTGCCTTGACTCGACCT	59.907	GCATCCATTAGCTCTCGTCC	59.803	190	Bra020348	A02	5310409	5313273	Bra020348	K18443|1|6e-123|261|rcu:RCOM_0732470|golgi-specific brefeldin A-resistance guanine nucleotide exchange factor 1	GO:0044464	GO:0005515//protein binding;GO:0004175//endopeptidase activity	GO:0019538//protein metabolic process;GO:0044092//negative regulation of molecular function	gi|685271379|ref|XP_009126732.1|/0/PREDICTED: cucumisin-like isoform X2 [Brassica rapa]
A2S26	BrScaffold000030_1059	(ATC)9	p3	27	AAACCCTAATCTCGCCACCT	59.962	CCTGGAGTTGTGGAGAAAGC	59.844	105	Bra020444	A02	5780684	5783620	Bra020444	K09285|1|3e-145|424|brp:103851711|AP2-like factor, ANT lineage	GO:0043231//intracellular membrane-bounded organelle	GO:0003676//nucleic acid binding;GO:0001071//nucleic acid binding transcription factor activity	GO:0048513//animal organ development;GO:0006351//transcription, DNA-templated;GO:0009653//anatomical structure morphogenesis;GO:0009790//embryo development	gi|685271592|ref|XP_009126838.1|/1.97726e-144/PREDICTED: AP2-like ethylene-responsive transcription factor AIL5 [Brassica rapa]
A2S6	BrScaffold000107_155	(TGA)9	p3	27	TGCTGGTGATGAGAGAGGTG	59.98	CTCTCTTCCCTGTCGTCCAC	59.835	269	Bra035609	A02	6302882	6304147	Bra035609	-	-	-	-	gi|674868818|emb|CDY65748.1|/3.19768e-173/BnaAnng21010D [Brassica napus]
A2S27	BrScaffold000038_689	(AT)11	p2	22	TTTCGGATCCATTTCTTTCG	60.009	GAAAAGCCTTTGCCTGTGAG	59.993	228	Bra022666	A02	7142534	7143002	Bra022666	-	-	-	-	gi|685272169|ref|XP_009127149.1|/5.34027e-15/PREDICTED: uncharacterized protein LOC103852021 [Brassica rapa]
A2S7	BrScaffold000038_52	(AAG)5gagaca(TCT)5	c	36	CTTGTGAAGATAAACGCGGC	60.772	CCCAAACAAACACCAGCTTT	60.008	272	Bra022480	A02	8491403	8492045	Bra022480	-	GO:0009536//plastid	-	GO:0009416//response to light stimulus	gi|685272667|ref|XP_009127399.1|/5.92772e-73/PREDICTED: ycf20-like protein [Brassica rapa]
A2S29	BrScaffold000092_86	(AGG)6	p3	18	TTCGAAGAAGGCTCTGCAAT	60.096	CAGCGTGGACCGATATACCT	59.978	222	Bra033938	A02	9771589	9773590	Bra033938	K14803|1|6e-71|135|ppp:PHYPADRAFT_124913|protein phosphatase 2C homolog 2/3 [EC:3.1.3.16];K17500|4|1e-46|155|osa:4347278|integrin-linked kinase-associated serine/threonine phosphatase 2C [EC:3.1.3.16]	-	GO:0016787//hydrolase activity	-	gi|685273178|ref|XP_009127629.1|/5.60107e-133/PREDICTED: probable protein phosphatase 2C 15 [Brassica rapa]
A2S8	BrScaffold000144_5	(AC)8atatattagagaaaaccaaattggtgaatgatgcggtg(AACA)5	c	74	TGATCTTCACAGGTTGCGTC	59.837	ACATTTCACCGTGGAGCTTG	61.096	246	Bra038305	A02	10366163	10369056	Bra038305	K18932|1|1e-55|124|mus:103985137|palmitoyltransferase [EC:2.3.1.225]	-	-	-	gi|685273371|ref|XP_009127730.1|/0/PREDICTED: probable protein S-acyltransferase 22 [Brassica rapa]
A2S31	BrScaffold000007_315	(AT)10gatatgcaaaatttagtaaagaaaaaactttacatatatataaaagcaagctcaagcatatggttggtgtaagataaaacctaaaaactacaaatggc(GCAT)3	c	130	TACATGTTGCGTGGCTGTTT	60.18	TGCATGCGTTGATACACAAA	59.716	254	Bra007952	A02	11073519	11075422	Bra007952	K09338|1|4e-42|173|brp:103852693|homeobox-leucine zipper protein	GO:0043231//intracellular membrane-bounded organelle	GO:0003676//nucleic acid binding;GO:0001071//nucleic acid binding transcription factor activity	GO:0006351//transcription, DNA-templated	gi|685273595|ref|XP_009127836.1|/2.20945e-41/PREDICTED: homeobox-leucine zipper protein ATHB-X-like [Brassica rapa]
A2S32	BrScaffold000007_1522	(TA)9	p2	18	GGGAGATGCCGTCTTTATGA	60.036	TACAATGTTCGTCCGTCCAA	59.964	155	Bra008316	A02	13663976	13665403	Bra008316	K13066|1|9e-143|202|aly:ARALYDRAFT_476917|caffeic acid 3-O-methyltransferase [EC:2.1.1.68]	GO:0044444//cytoplasmic part	GO:0008168//methyltransferase activity	GO:0009699//phenylpropanoid biosynthetic process	gi|674894473|emb|CDY38336.1|/0/BnaA02g18290D [Brassica napus]
A2S10	BrScaffold000007_1793	(AG)9	p2	18	CTGCTCTTCGCCTTGAATCT	59.717	ATCTTCTGCAACTCCACGCT	60.02	230	Bra008389	A02	14252318	14258991	Bra008389	K04498|1|0.0|896|brp:103853155|E1A/CREB-binding protein [EC:2.3.1.48]	GO:0043231//intracellular membrane-bounded organelle	GO:0000989//transcription factor activity, transcription factor binding;GO:0004468//lysine N-acetyltransferase activity, acting on acetyl phosphate as donor;GO:0046914//transition metal ion binding	GO:0009648//photoperiodism;GO:0006357//regulation of transcription from RNA polymerase II promoter;GO:0009292;GO:0009791//post-embryonic development;GO:0043543	gi|685274606|ref|XP_009128325.1|/0/PREDICTED: histone acetyltransferase HAC1-like [Brassica rapa]
A2S11	BrScaffold000086_124	(GAA)6	p3	18	GAAGCGTAAGACGGTGAAGC	60.022	GATTGTATGTGTTGCCGTCG	59.995	191	Bra033142	A02	16574396	16576797	Bra033142	-	-	-	-	gi|685275361|ref|XP_009128670.1|/0/PREDICTED: uncharacterized protein LOC103853520 [Brassica rapa]
A2S34	BrScaffold000036_297	(AAG)4cc(GAA)4gtatatgaa(GAAGAG)3	c	53	CGAATGGATTGACGAGTGTG	60.112	AGGACTTGCATGGTTTTTCG	60.11	193	Bra022011	A02	18177132	18177780	Bra022011	-	-	-	-	gi|674955673|emb|CDX77625.1|/1.24512e-23/BnaC07g18790D [Brassica napus]
A2S12	BrScaffold000052_596	(GAT)10	p3	30	GTTTTCTGTTTCTCGCTCGC	60.14	TGTCATGGTCACCCGAAGTA	59.96	280	Bra026641	A02	19702742	19707268	Bra026641	K15305|1|7e-89|173|brp:103854048|vacuole morphology and inheritance protein 14	GO:0031090//organelle membrane	-	-	gi|685276497|ref|XP_009129214.1|/4.26319e-88/PREDICTED: protein VAC14 homolog [Brassica rapa]
A2S38	BrScaffold000052_565	(GGA)5	p3	15	CACTCTGGTGATGGAGATGC	59.212	CCATCATGGAGCTCACCTTT	60.073	274	Bra026631	A02	19784703	19787694	Bra026631	K00924|1|1e-123|445|aly:ARALYDRAFT_313416|	GO:0005618//cell wall;GO:0031224//intrinsic component of membrane	GO:0004672//protein kinase activity;GO:0032559	GO:0006464//cellular protein modification process;GO:0048229//gametophyte development	gi|685276457|ref|XP_009129193.1|/0/PREDICTED: probable receptor protein kinase TMK1 isoform X1 [Brassica rapa]
A2S35	BrScaffold000052_427	(TGC)6	p3	18	GATGAGTGGCAACTGCTTGA	59.992	AAGAAAACACACGGAAACGG	60.008	221	Bra026613	A02	20074117	20076232	Bra026613	-	-	GO:0005488	-	gi|685276403|ref|XP_009129167.1|/0/PREDICTED: zinc finger CCCH domain-containing protein 17 [Brassica rapa]
A2S43	BrScaffold000115_178	(AAG)5	p3	15	GGGAACTGGAAATTGGGTTT	60.032	AAACCGGGTCCTTACAGCTT	59.998	252	Bra036365	A02	21150732	21152040	Bra036365	K03564|1|6e-75|281|brp:103854405|peroxiredoxin Q/BCP [EC:1.11.1.15]	GO:0009526//plastid envelope;GO:0009570//chloroplast stroma;GO:0009534//chloroplast thylakoid	GO:0005488;GO:0016705//oxidoreductase activity, acting on paired donors, with incorporation or reduction of molecular oxygen	-	gi|685277276|ref|XP_009129587.1|/3.5673e-74/PREDICTED: peroxiredoxin Q, chloroplastic isoform X1 [Brassica rapa]
A2S13	BrScaffold000115_143	(TCA)8	p3	24	TGAAGTGTCACTGGAGCCAT	59.261	ACGCCGTGTCAGAAGAAGAT	59.874	232	Bra036357	A02	21229045	21232810	Bra036357	K01191|1|2e-56|222|pxb:103958275|alpha-mannosidase [EC:3.2.1.24];K12741|2|1e-25|101|crb:CARUB_v10026886mg|heterogeneous nuclear ribonucleoprotein A1/A3	-	-	-	gi|685277248|ref|XP_009129577.1|/9.18537e-141/PREDICTED: uncharacterized protein LOC103854395 [Brassica rapa]
A2S49	BrScaffold000085_173	(CTC)5	p3	15	CGAGCTTCATCTCCTCCATC	59.91	GAGCTGCTGAAGAAGAGCGT	60.043	226	Bra032984	A02	21995219	21996004	Bra032984	-	GO:0030529//intracellular ribonucleoprotein complex;GO:0009536//plastid	GO:0005198//structural molecule activity	GO:0010467//gene expression;GO:0022613//ribonucleoprotein complex biogenesis	gi|685276991|ref|XP_009129445.1|/8.31697e-47/PREDICTED: uncharacterized protein LOC103854264 [Brassica rapa]
A2S50	BrScaffold000085_258	(CT)11	p2	22	GGCAACATGCATTGGTTTTT	60.742	CCCGGTTTTGGAGTTTGTTA	59.833	201	Bra033012	A02	22161177	22173247	Bra033012	K03246|1|1e-106|143|brp:103854233|translation initiation factor 3 subunit I	GO:0031461//cullin-RING ubiquitin ligase complex	GO:0005488	GO:0006970//response to osmotic stress;GO:0010038//response to metal ion	gi|674898711|emb|CDY34145.1|/2.29258e-107/BnaA02g28950D [Brassica napus]
A2S54	BrScaffold000031_737	(TGA)5	p3	15	ATCTGGTTCACGGGTGTCTC	59.969	CATGCCACAAAGATCAATCG	60.073	204	Bra020696	A02	23152783	23153097	Bra020696	-	GO:0044464	GO:0046914//transition metal ion binding;GO:0008289//lipid binding;GO:0022892;GO:0016787//hydrolase activity	GO:0010876//lipid localization;GO:0009627//systemic acquired resistance	gi|674883726|emb|CDY48760.1|/1.15083e-46/BnaA02g30210D [Brassica napus]
A2S55	BrScaffold000031_725	(GAAGAC)3	p6	18	TGAGCTTATTGCGGTGAATG	59.833	CCAAACCGAAATGAAGTCGT	59.971	216	Bra020690	A02	23192663	23193837	Bra020690	K09569|1|1e-45|125|brp:103854545|FK506-binding protein 2 [EC:5.2.1.8]	GO:0009534//chloroplast thylakoid	GO:0005527//macrolide binding;GO:0016853//isomerase activity	-	gi|685277574|ref|XP_009129737.1|/8.27291e-45/PREDICTED: peptidyl-prolyl cis-trans isomerase FKBP15-2-like [Brassica rapa]
A2S56	BrScaffold000031_670	(CCA)5ccgcctctctctccctttccgccagtaatgtcactg(ACA)4gcaagcttctgtttttgctggcgaac(AAG)4	c	101	CTCTTTCCCTCTCCCCAAAC	60.045	AAAACCCGTTCCGTTTTCTC	60.332	275	Bra020663	A02	23318952	23320016	Bra020663	-	-	-	-	gi|685277624|ref|XP_009129760.1|/1.06902e-107/PREDICTED: uncharacterized protein DDB_G0271670-like [Brassica rapa]
A2S57	BrScaffold000031_671	(AAC)4	p3	12	AGATCCAGATCTGTCGGGTG	60.072	TCACAATCTCCCTCACACCA	60.088	181	Bra020663	A02	23318952	23320016	Bra020663	-	-	-	-	gi|685277624|ref|XP_009129760.1|/1.06902e-107/PREDICTED: uncharacterized protein DDB_G0271670-like [Brassica rapa]
A2S58	BrScaffold000031_664	(CTT)5ca(TCT)4ccttt(TTC)4	c	46	CAGTGCACACTAGCAGCCAT	60.08	AAAGCCATAGCAGCAGAAGC	59.758	270	Bra020661	A02	23324904	23330876	Bra020661	K10895|1|0.0|535|brp:103854575|fanconi anemia group I protein	-	-	-	gi|685277626|ref|XP_009129761.1|/0/PREDICTED: LOW QUALITY PROTEIN: Fanconi anemia group I protein [Brassica rapa]
2S4	BrScaffold000031_588	(AT)13	p2	26	GGAATGCAAGGTGACGAGTT	60.119	TAGCTTGGCAAGACACAACG	60.05	233	Bra020641	A02	23466863	23467417	Bra020641	-	-	-	-	gi|674899008|emb|CDY33908.1|/1.02651e-18/BnaA02g30790D [Brassica napus]
A2S59	BrScaffold000031_565	(AAG)7	p3	21	AGTAGCACCTCCAAGCCTCA	60.012	GTGGATACAGCTTTGCGTGA	59.871	214	Bra020633	A02	23507395	23511796	Bra020633	K02922|1|2e-30|131|brp:103871221|large subunit ribosomal protein L37e	GO:0005840//ribosome	GO:0005198//structural molecule activity	GO:0010467//gene expression;GO:0022613//ribonucleoprotein complex biogenesis	gi|674899000|emb|CDY33900.1|/3.19745e-60/BnaA02g30870D [Brassica napus]
A2S60	BrScaffold000031_492	(CGG)5	p3	15	CGTAATCCTTACCGGAAGAGC	60.102	TCCGCCAGAGAAAAGAGAGA	60.21	106	Bra020612	A02	23665790	23667948	Bra020612	K11517|1|5e-07|57.4|brp:103870158|(S)-2-hydroxy-acid oxidase [EC:1.1.3.15]	-	-	-	gi|685277775|ref|XP_009129832.1|/1.01146e-81/PREDICTED: putative DNA-binding protein ESCAROLA isoform X1 [Brassica rapa]
A2S61	BrScaffold000031_493	(TGG)7	p3	21	GCTCAATCGGAGCTGAAGAC	60.104	ATGGAACCTAACGAAAGGCA	59.569	202	Bra020612	A02	23665790	23667948
A2S62	BrScaffold000031_491	(TCG)4	p3	12	AGGATCCTCTCCTGATCGGT	60.035	GAGACTTCGTCTGCTACCGC	60.164	277	Bra020611	A02	23669053	23671736	Bra020611	K17604|1|4e-29|130|vvi:104878292|zinc finger SWIM domain-containing protein 3	-	-	GO:0009416//response to light stimulus	gi|685277779|ref|XP_009129834.1|/0/PREDICTED: putative protein FAR1-RELATED SEQUENCE 10 [Brassica rapa]
A2S14	BrScaffold000031_391	(CTT)10	p3	30	GATGCAACTGAATGTGGTGG	59.967	ACAAGGGAGAGATGTGGCAG	60.261	222	Bra020584	A02	23889451	23894088	Bra020584	-	-	GO:0003676//nucleic acid binding;GO:0001071//nucleic acid binding transcription factor activity	-	gi|685277853|ref|XP_009129869.1|/4.27736e-173/PREDICTED: protein ALWAYS EARLY 1-like [Brassica rapa]
A2S63	BrScaffold000031_317	(TCC)7	p3	21	ACCCATCCAAAAAGGGAGTC	60.169	CCGAGGAGGAAATGAGTGAA	60.187	261	Bra020557	A02	24039904	24043809	Bra020557	-	-	-	-	gi|685277924|ref|XP_009129907.1|/0/PREDICTED: putative RNA polymerase II subunit B1 CTD phosphatase RPAP2 homolog [Brassica rapa]
A2S64	BrScaffold000031_288	(TA)7	p2	14	AGCAGCTGAGAGGATGAACC	59.56	TGCCTCATGATGTCTGGGTA	60.072	167	Bra020549	A02	24096913	24100014	Bra020549	K01237|1|3e-138|285|brp:103854698|myrosinase [EC:3.2.1.147]	-	GO:0004553//hydrolase activity, hydrolyzing O-glycosyl compounds;GO:0043169//cation binding	GO:0008152//metabolic process	gi|4033345|emb|CAA11412.1|/1.38327e-140/myrosinase, thioglucoside glucohydrolase [Brassica juncea]
A2S69	BrScaffold000031_224	(ATAC)3aaatacagtagatactgttacatttttggta(AT)6	c	55	TGCCTCATGATGTCTGGGTA	60.072	AGCAGCTGAGAGGATGAACC	59.56	165	Bra020523	A02	24254180	24256341	Bra020523	K01237|1|9e-132|221|brp:103854699|myrosinase [EC:3.2.1.147]	GO:0043231//intracellular membrane-bounded organelle	GO:0004553//hydrolase activity, hydrolyzing O-glycosyl compounds;GO:0043169//cation binding	GO:0044238//primary metabolic process	gi|674927929|emb|CDY05334.1|/0/BnaC02g40420D [Brassica napus]
A2S70	BrScaffold000031_107	(GAG)4	p3	12	CGCTTTCTCTCGTTGTTTCC	59.993	ATTACCCTCTCCGTCGCTCT	60.233	167	Bra020495	A02	24473489	24475459	Bra020495	-	GO:0031090//organelle membrane	-	-	gi|685278067|ref|XP_009129972.1|/4.71115e-144/PREDICTED: uncharacterized protein LOC103854763 [Brassica rapa]
A2S71	BrScaffold000031_100	(CTT)4	p3	12	CCGGAGCTACATACCTCTCC	58.766	GAAGTGAAAGCTGGTGGAGC	59.997	210	Bra020492	A02	24484798	24485175	Bra020492	K03549|1|3e-08|57.4|mtr:MTR_092s0008|KUP system potassium uptake protein	-	-	-	gi|685278076|ref|XP_009129977.1|/3.32768e-70/PREDICTED: uncharacterized protein LOC103854768 [Brassica rapa]
A2S72	BrScaffold000031_99	(CT)6	p2	12	TCATTCCAAATGGCCTTACC	59.762	TCGCCTTATCTTCCTCCTGA	59.91	141	Bra020491	A02	24486186	24488261	Bra020491	K15613|1|1e-34|85.9|ppp:PHYPADRAFT_235352|homeobox protein Meis1	GO:0043231//intracellular membrane-bounded organelle;GO:0044444//cytoplasmic part	GO:0003677//DNA binding	GO:0009314//response to radiation;GO:0009720//detection of hormone stimulus;GO:0034097//response to cytokine;GO:0006351//transcription, DNA-templated	gi|685278078|ref|XP_009129978.1|/4.53413e-111/PREDICTED: homeobox protein knotted-1-like 3 isoform X1 [Brassica rapa]
A2S15	BrScaffold000065_669	(TCT)6tcatcttgatcg(TCT)7	c	51	AGCTCAGTTACGGTCGGAGA	60.012	AAACGTGTGGAAAGTGAGGG	60.005	250	Bra029409	A02	24781320	24782654	Bra029409	-	-	-	-	gi|685278244|ref|XP_009130062.1|/6.66327e-92/PREDICTED: protein fantom [Brassica rapa]
A2S73	BrScaffold000065_670	(TCC)7tcgatgccgtcgtcttcctcctcaacgactcttctcctcttcttctccctcttctccgtggcgaatttgggccgttgg(GGA)6	c	117	TTTCCACACGTTTCTCCTCC	60.088	AAGCAATCGAACCCTAAGCA	59.845	264	Bra029409	A02	24781320	24782654	Bra029409	-	-	-	-	gi|685278244|ref|XP_009130062.1|/6.66327e-92/PREDICTED: protein fantom [Brassica rapa]
A2S16	BrScaffold000078_444	(CTC)10(CTT)4tttcaggtactttcattacttttcccatcttttagtattcagt(TTTTG)3	c	100	TCTGAGGAAAACCCACTTCG	60.224	ACAACGGTCGCTTCTTGTCT	59.914	251	Bra031939	A02	26096263	26098095	Bra031939	-	GO:0009536//plastid	-	-	gi|685278988|ref|XP_009130431.1|/8.88129e-165/PREDICTED: protein trichome birefringence-like 14 [Brassica rapa]
A3S1	BrScaffold000005_45	(TGC)7	p3	21	GTTCCATTGTGCCTGAGGAT	59.934	GCTCCACCAAACACAAGGTT	60.012	189	Bra005667	A03	57623	60040	Bra005667	-	GO:0044431//Golgi apparatus part	GO:0022892	GO:0048193//Golgi vesicle transport;GO:0015031//protein transport	gi|685279411|ref|XP_009130628.1|/2.21728e-112/PREDICTED: target of Myb protein 1 isoform X2 [Brassica rapa]
A3S24	BrScaffold000005_231	(AT)6	p2	12	TCATCACTTCCACGGGTACA	59.96	TCGGATTCTTCGAGCTGTCT	60.096	236	Bra005731	A03	334091	334623	Bra005731	-	-	-	-	gi|685279583|ref|XP_009130713.1|/6.54817e-25/PREDICTED: uncharacterized protein LOC103855476 [Brassica rapa]
A3S54	BrScaffold000005_509	(AGG)5	p3	15	TCTCTAATAATGGCGACCCG	60.053	GAGGAATCTGTTGAGGAGCG	59.95	240	Bra005838	A03	870408	871738	Bra005838	K02865|1|1e-17|91.7|sita:101759799|large subunit ribosomal protein L10Ae;K14771|2|3e-06|53.9|vcn:VOLCADRAFT_116880|U3 small nucleolar RNA-associated protein 19	-	-	-	gi|674880049|emb|CDY52134.1|/4.24184e-131/BnaA03g55130D [Brassica napus]
A3S25	BrScaffold000005_648	(CAA)4(CCG)4	c	24	CCACTAAAACACTCCCCACG	60.401	ACGCGTAAGCGAAAGTTGAT	59.911	188	Bra005906	A03	1148701	1150743	Bra005906	-	-	-	GO:0009664//plant-type cell wall organization;GO:0009832//plant-type cell wall biogenesis;GO:0009250//glucan biosynthetic process	gi|685280076|ref|XP_009130955.1|/0/PREDICTED: protein trichome birefringence-like [Brassica rapa]
A3S28	BrScaffold000005_1048	(TCA)5	p3	15	TTCTGGGATAACATCAGCGA	59.226	ATGAACAACGAGAGGTGGGA	60.51	185	Bra006082	A03	1905121	1906515	Bra006082	-	-	-	-	gi|685280561|ref|XP_009131187.1|/8.43463e-45/PREDICTED: DEAD-box ATP-dependent RNA helicase 28 [Brassica rapa]
A3S56	BrScaffold000005_1331	(TG)7	p2	14	ACCAAGCCAACTCCATGTTC	59.973	CTGACTCGTTCCAAGAAGGG	59.837	234	Bra006195	A03	2468562	2470993	Bra006195	K09286|1|3e-17|91.7|ath:AT1G43160|EREBP-like factor	-	-	GO:0009987//cellular process;GO:0009725//response to hormone;GO:0006970//response to osmotic stress;GO:0050826//response to freezing	gi|685280854|ref|XP_009131332.1|/1.27484e-68/PREDICTED: ethylene-responsive transcription factor ERF113-like [Brassica rapa]
A3S29	BrScaffold000005_1369	(TC)12	p2	24	CAGCTTTTGCATTGGTTGTG	60.293	CTTCAACAGAGGCCCTTGAG	59.982	277	Bra006212	A03	2543354	2546508	Bra006212	K12818|1|4e-12|54.7|smo:SELMODRAFT_429199|ATP-dependent RNA helicase DHX8/PRP22 [EC:3.6.4.13]	GO:0000325//plant-type vacuole	GO:0022891//substrate-specific transmembrane transporter activity	GO:0051707//response to other organism;GO:0010038//response to metal ion;GO:0072507//divalent inorganic cation homeostasis	gi|674923402|emb|CDY09820.1|/3.52989e-67/BnaC09g43410D [Brassica napus]
A3S4	BrScaffold000005_1575	(TC)28	p2	56	AACAAAGAGGAAACTGCCGA	59.853	GCGGACGCCAAAACTAACTA	60.264	208	Bra006328	A03	3034196	3038533	Bra006328	K03083|1|1e-102|174|zma:100283734|glycogen synthase kinase 3 beta [EC:2.7.11.26]	GO:0044444//cytoplasmic part	GO:0004672//protein kinase activity;GO:0019787//ubiquitin-like protein transferase activity;GO:0032559	GO:0019941//modification-dependent protein catabolic process;GO:0006464//cellular protein modification process;GO:0006970//response to osmotic stress	gi|502116881|ref|XP_004495625.1|/6.05493e-113/PREDICTED: glycogen synthase kinase-3 homolog MsK-1-like isoform X1 [Cicer arietinum]
A3S31	BrScaffold000005_1757	(AGGA)3(AGG)5*	c*	23	AAGCGTCGTTGAGACCATCT	59.874	CCGCAATGGTGCTACCTAAT	59.982	256	Bra006415	A03	3412333	3413322	Bra006415	K19041|1|1e-63|243|cmo:103483448|E3 ubiquitin-protein ligase RNF38/44 [EC:2.3.2.27]	-	GO:0046914//transition metal ion binding	GO:0009628//response to abiotic stimulus	gi|685281391|ref|XP_009131602.1|/0/PREDICTED: RING-H2 finger protein ATL52 [Brassica rapa]
A3S57	BrScaffold000005_2024	(GCG)6	p3	18	GGCAACCGATCAAGAACAAT	59.939	ATACCCTAGGCTGCTGCTGA	60	150	Bra006563	A03	4065426	4069134	Bra006563	-	-	-	-	gi|685281785|ref|XP_009131800.1|/2.08368e-84/PREDICTED: protein Brevis radix-like 4 [Brassica rapa]
A3S32	BrScaffold000005_2232	(TTTGT)4	p5	20	CGGAATCCTCTGCTCTCATC	59.91	CTCCAGCATCGAATCAACAA	59.799	202	Bra006648	A03	4464031	4466477	Bra006648	K06185|1|0.0|718|brp:103856545|ATP-binding cassette, subfamily F, member 2	-	GO:0017111//nucleoside-triphosphatase activity;GO:0000166//nucleotide binding	-	gi|685281982|ref|XP_009131903.1|/0/PREDICTED: ABC transporter F family member 1-like [Brassica rapa]
A3S5	BrScaffold000064_30	(GAA)7	p3	21	CACCAGACTGAGCTGATCCA	59.98	GAGGATGTGAGGAGTGGGAA	60.048	124	Bra028935	A03	5483231	5490806	Bra028935	K11982|1|3e-171|604|brp:103856934|E3 ubiquitin-protein ligase RNF115/126 [EC:2.3.2.27]	-	GO:0046914//transition metal ion binding	-	gi|674896128|emb|CDY36794.1|/0/BnaA03g10920D [Brassica napus]
A3S58	BrScaffold000064_230	(AT)6	p2	12	TGCATTCTTCATTAAGTAGCGAAA	60.265	GAGGGGTGGTGTAGGGTCTT	60.23	252	Bra029007	A03	5840297	5843741	Bra029007	K03146|1|8e-93|277|cic:CICLE_v10024231mg|thiamine thiazole synthase	GO:0009532//plastid stroma;GO:0009526//plastid envelope	GO:0046914//transition metal ion binding;GO:0042802//identical protein binding	GO:0006772//thiamine metabolic process;GO:0033554//cellular response to stress;GO:0018130	gi|413950398|gb|AFW83047.1|/3.23156e-93/hypothetical protein ZEAMMB73_797739 [Zea mays]
A3S59	BrScaffold000064_532	(AAC)6	p3	18	CCACTAAACTCCGGTCGAAA	60.103	GAGAACATCGTGTCGGGTTT	59.973	170	Bra029105	A03	6390950	6391813	Bra029105	-	-	-	-	gi|685283200|ref|XP_009132512.1|/1.10159e-114/PREDICTED: probable membrane-associated kinase regulator 5 [Brassica rapa]
A3S6	BrScaffold000064_653	(AG)13	p2	26	TCTTCGCATACTGATTGCCA	60.366	TGAACTGAAACGGGAACACA	60.128	253	Bra029169	A03	6674333	6677942	Bra029169	K01410|1|0.0|221|brp:103857178|mitochondrial intermediate peptidase [EC:3.4.24.59]	GO:0009534//chloroplast thylakoid	GO:0004175//endopeptidase activity	GO:0019538//protein metabolic process	gi|685283382|ref|XP_009132601.1|/0/PREDICTED: probable mitochondrial intermediate peptidase, mitochondrial isoform X1 [Brassica rapa]
A3S35	BrScaffold000039_181	(TA)12	p2	24	ACCGAAGGAGACTGCAAAGA	59.989	TTTACACCACTAAAACATTGCCA	59.454	261	Bra022802	A03	7147092	7149367	Bra022802	K00487|1|2e-155|550|brp:103857322|trans-cinnamate 4-monooxygenase [EC:1.14.13.11]	GO:0031090//organelle membrane;GO:0043231//intracellular membrane-bounded organelle	GO:0016709//oxidoreductase activity, acting on paired donors, with incorporation or reduction of molecular oxygen, NAD(P)H as one donor, and incorporation of one atom of oxygen;GO:0005506//iron ion binding	GO:0009314//response to radiation;GO:0009698//phenylpropanoid metabolic process;GO:0006950//response to stress;GO:0048229//gametophyte development	gi|685283661|ref|XP_009132738.1|/1.07901e-154/PREDICTED: trans-cinnamate 4-monooxygenase-like [Brassica rapa]
A3S62	BrScaffold000039_213	(AT)11	p2	22	TGATTGATATTTGTACAGAATTGTTTT	57.413	GAGGCACCTCTTTTTAGGGTT	58.77	280	Bra022811	A03	7188461	7197256	Bra022811	-	-	-	-	gi|685283681|ref|XP_009132748.1|/0/PREDICTED: uncharacterized GPI-anchored protein At1g61900-like [Brassica rapa]
A3S63	BrScaffold000039_268	(GAT)8	p3	24	AAGGGCAAGGAGGAAAAGAG	59.821	GTCTGGGTACAGGCGAATTG	60.517	261	Bra022830	A03	7307438	7309016	Bra022830	-	GO:0009536//plastid	-	GO:0009725//response to hormone	gi|685283730|ref|XP_009132771.1|/3.44103e-130/PREDICTED: rho-N domain-containing protein 1, chloroplastic-like [Brassica rapa]
A3S36	BrScaffold000039_530	(TG)9cttgttgttgcaatcttgatatcttttgtgggtttttgagtttcttcgtttgttgtgttgagttttatgaactgaaacatgagctctgatcttt(TG)8	c	128	CCCCTCTTGACGTGTCTTGT	60.151	CTGTCGAGCCTGCATAAACA	60.011	264	Bra022946	A03	7905972	7907496	Bra022946	K07374|1|5e-11|70.1|gmx:100819125|tubulin alpha	GO:0044444//cytoplasmic part	GO:0003676//nucleic acid binding	-	gi|685284076|ref|XP_009132940.1|/4.53456e-80/PREDICTED: putative DNA-binding protein ESCAROLA [Brassica rapa]
A3S64	BrScaffold000039_849	(AC)11	p2	22	GGTTCCACTGTTCAAAAGAAGG	60.012	AGCTCAGGAACAAACCTCCA	59.844	235	Bra023068	A03	8505585	8508995	Bra023068	K00850|1|3e-18|95.5|brp:103868514|6-phosphofructokinase 1 [EC:2.7.1.11];K10712|2|3e-13|79.0|brp:103832656|cysteamine dioxygenase [EC:1.13.11.19];K07466|3|4e-09|65.1|brp:103841154|replication factor A1	-	GO:0003677//DNA binding	-	gi|674953977|emb|CDX79679.1|/4.22118e-36/BnaC03g20150D [Brassica napus]
A3S66	BrScaffold000001_115	(GAT)6	p3	18	GTCAGGACTGCAGGAAAAGC	59.997	TGCGTTAGCGTTTTGTTTTG	59.917	253	Bra000037	A03	8968571	8971517	Bra000037	K01962|1|0.0|611|brp:103857757|acetyl-CoA carboxylase carboxyl transferase subunit alpha [EC:6.4.1.2]	GO:0009526//plastid envelope;GO:0043234//protein complex;GO:0009532//plastid stroma	GO:0016421//CoA carboxylase activity	GO:0006631//fatty acid metabolic process	gi|674925685|emb|CDY07754.1|/0/BnaA03g17570D [Brassica napus]
A3S8	BrScaffold000001_200	(AAC)5actaatgcagggccttatggttacgctatg(AAC)6	c	63	CTTCAGCCCCAATTAGACCA	60.066	GAGAATCCACCAGCGAAGTC	59.81	190	Bra000064	A03	9149020	9150925	Bra000064	K13424|1|1e-165|528|brp:103857785|WRKY transcription factor 33	GO:0043231//intracellular membrane-bounded organelle	GO:0005488;GO:0001071//nucleic acid binding transcription factor activity	GO:0006952//defense response;GO:0009700//indole phytoalexin biosynthetic process;GO:0009743//response to carbohydrate;GO:0006970//response to osmotic stress;GO:0010467//gene expression	gi|685284713|ref|XP_009133259.1|/7.91423e-165/PREDICTED: probable WRKY transcription factor 33 [Brassica rapa]
A3S67	BrScaffold000001_440	(GAA)7caaacggctcag(GAA)4	c	45	AAGAAGCAATGGCTGAGGAA	59.955	ATCCCACCAAAGATGCTGAG	60.073	270	Bra000161	A03	9657250	9658704	Bra000161	-	-	-	-	gi|685284989|ref|XP_009133399.1|/3.82145e-25/PREDICTED: histone acetyltransferase KAT6B isoform X1 [Brassica rapa]
A3S68	BrScaffold000001_479	(TGT)6	p3	18	GAGCTCCACATCACCCATCT	60.08	AGCCTTTGGTCATTACGGTG	59.993	208	Bra000178	A03	9746891	9749607	Bra000178	K09286|1|7e-125|449|brp:103857921|EREBP-like factor	-	GO:0043565//sequence-specific DNA binding	GO:0006351//transcription, DNA-templated;GO:0009756//carbohydrate mediated signaling;GO:0034285;GO:0009755//hormone-mediated signaling pathway;GO:0019433//triglyceride catabolic process;GO:0008104//protein localization;GO:0009746;GO:0006950//response to stress;GO:0048528//post-embryonic root development	gi|685285038|ref|XP_009133423.1|/4.14424e-124/PREDICTED: ethylene-responsive transcription factor ABI4 [Brassica rapa]
A3S38	BrScaffold000001_661	(CAA)7aaaaagataaacttttagaataaaactcacactctttcgatcagtgaatatgcatgaagagtgtt(GA)11	c	108	GTGAATTGTGGTGTCAACGC	60.016	CATGGAGGAGGCAGCTAAAG	59.971	261	Bra000236	A03	10092906	10104722	Bra000236	K05643|1|4e-139|211|egu:105045538|ATP-binding cassette, subfamily A (ABC1), member 3	GO:0031090//organelle membrane	GO:0017111//nucleoside-triphosphatase activity;GO:0000166//nucleotide binding;GO:0015405	-	gi|685285193|ref|XP_009133505.1|/7.22212e-118/PREDICTED: ABC transporter A family member 1 [Brassica rapa]
A3S69	BrScaffold000001_818	(TGT)7	p3	21	AGGGAGTTTGGACTGTCGTG	60.151	CATTGAGGAACCATGAAGCA	59.648	196	Bra000281	A03	10342727	10343512	Bra000281	K07374|1|2e-41|169|gmx:100819125|tubulin alpha	GO:0009536//plastid	GO:0003676//nucleic acid binding	-	gi|685285303|ref|XP_009133560.1|/1.75347e-121/PREDICTED: putative DNA-binding protein ESCAROLA [Brassica rapa]
A3S9	BrScaffold000001_1089	(AAG)8	p3	24	AAGAGGTCTCACGGAAGCAA	59.989	TCATCATCTTCGTTTGGTGC	59.654	155	Bra000372	A03	10809860	10814409	Bra000372	-	-	GO:0046914//transition metal ion binding;GO:0001071//nucleic acid binding transcription factor activity	GO:0006351//transcription, DNA-templated	gi|685285582|ref|XP_009133702.1|/4.61331e-102/PREDICTED: zinc finger protein ZAT4 [Brassica rapa]
A3S40	BrScaffold000001_1362	(TGA)6ttcttcacaaaaaaagagc(AAG)5	c	52	ATTGGGAGCAGCAGAAAAGA	59.955	TTACTTGCTTTGATGCGTGG	59.872	149	Bra000463	A03	11250312	11252435	Bra000463	-	-	-	-	gi|685285827|ref|XP_009133830.1|/0/PREDICTED: uncharacterized protein LOC103858259 [Brassica rapa]
A3S10	BrScaffold000001_1501	(CTC)8	p3	24	CAACAGGCAGAAAATGCTGA	59.988	AGTGGCAAATTCGGACAGAC	60.119	275	Bra000516	A03	11549497	11550832	Bra000516	K13195|1|5e-20|99.8|eus:EUTSA_v10002114mg|cold-inducible RNA-binding protein	-	GO:0005488	-	gi|685285966|ref|XP_009133900.1|/1.89361e-46/PREDICTED: uncharacterized protein LOC103858323 isoform X1 [Brassica rapa]
A3S73	BrScaffold000001_1872	(TGG)7	p3	21	TTTGCCCAGATGGAGAAATC	60.014	TTACTGTGGTCAGCTCCACG	59.897	194	Bra000643	A03	12251632	12252450	Bra000643	-	-	-	-	gi|674949951|emb|CDX83140.1|/2.15947e-25/BnaA03g23660D [Brassica napus]
A3S11	BrScaffold000001_2522	(TCT)8	p3	24	AAGTCTTTTGGCGAGACCCT	60.247	GAAGGTTGTAGGGATTGCGA	60.074	232	Bra000880	A03	13690093	13692132	Bra000880	K04730|1|7e-162|571|egu:105042690|interleukin-1 receptor-associated kinase 1 [EC:2.7.11.1]	-	GO:0004672//protein kinase activity;GO:0000166//nucleotide binding	-	gi|685287006|ref|XP_009134432.1|/0/PREDICTED: L-type lectin-domain containing receptor kinase IV.4-like [Brassica rapa]
A3S42	BrScaffold000001_2811	(GGA)7	p3	21	GCAGACGCATCTTTCAACAA	59.995	TTGGGGTTAAGCTCGAAGAA	59.817	275	Bra000987	A03	14302168	14305125	Bra000987	-	GO:0016020//membrane	-	-	gi|685287290|ref|XP_009134581.1|/0/PREDICTED: uncharacterized protein LOC103858888 [Brassica rapa]
A3S74	BrScaffold000001_3125	(TC)10	p2	20	GCTCTAGTGTCAAGGAGCGG	60.156	CCTTCCCGGGAGTAATCAGT	60.319	165	Bra001130	A03	14918037	14925742	Bra001130	K01738|1|4e-102|168|brp:103859070|cysteine synthase A [EC:2.5.1.47]	-	GO:0016835//carbon-oxygen lyase activity	GO:0000097//sulfur amino acid biosynthetic process	gi|674861327|emb|CDY69239.1|/2.24986e-101/BnaCnng62620D [Brassica napus]
A3S43	BrScaffold000001_3218	(TC)13	p2	26	GCCATCGTGACATAAAGCCT	60.103	TGCTCCAAAAATAAGCTCAGG	59.483	247	Bra001169	A03	15109781	15112199	Bra001169	K03083|1|2e-167|191|brp:103859116|glycogen synthase kinase 3 beta [EC:2.7.11.26]	-	GO:0004672//protein kinase activity;GO:0032559	GO:0006464//cellular protein modification process	gi|674882383|emb|CDY49981.1|/4.89206e-167/BnaC03g34380D [Brassica napus]
A3S13	BrScaffold000001_3551	(TCT)7	p3	21	CATCAGCCTTCTCTGCCTCT	59.703	CATTCCCAAACATGCCTTCT	59.933	276	Bra001311	A03	15806566	15808716		K09422|1|3e-134|476|ath:AT3G09370|myb proto-oncogene protein, plant	-	-	GO:0034645//cellular macromolecule biosynthetic process;GO:0010467//gene expression;GO:0044238//primary metabolic process	gi|297829468|ref|XP_002882616.1|/3.75475e-137/hypothetical protein ARALYDRAFT_317739 [Arabidopsis lyrata subsp. lyrata]
A3S14	BrScaffold000001_3948	(GTG)5gta(GTG)7	c	39	CTGTGATGTGTTTTGGGTCG	60.001	CCCCTTGAAACGTGAACACT	60.005	240	Bra001492	A03	16683947	16685149	Bra001492	K17964|1|2e-48|194|cit:102623768|leucine-rich PPR motif-containing protein, mitochondrial	GO:0043231//intracellular membrane-bounded organelle	-	-	gi|685288674|ref|XP_009135288.1|/0/PREDICTED: pentatricopeptide repeat-containing protein At3g13160, mitochondrial-like [Brassica rapa]
A3S45	BrScaffold000001_4013	(CAA)10	p3	30	ACTTCAGCATCTGGGGATCA	60.622	ATTTCCTGGTTGGTTCCTCC	60.169	168	Bra001523	A03	16860953	16863408	Bra001523	K12309|1|5e-63|243|egr:104424130|beta-galactosidase [EC:3.2.1.23]	-	GO:0046914//transition metal ion binding;GO:0001071//nucleic acid binding transcription factor activity	GO:0006351//transcription, DNA-templated	gi|685288757|ref|XP_009135332.1|/7.70037e-122/PREDICTED: zinc finger protein NUTCRACKER-like isoform X4 [Brassica rapa]
A3S46	BrScaffold000001_4234	(A)12caaattatttttatttggtttaa(AAAC)5	c	55	CCAATTTGCGTTAATGGTATATCT	58.478	GGCTTAAGTAGAGTGCCCCC	60.096	168	Bra001597	A03	17300839	17302575	Bra001597	K00162|1|5e-09|63.5|obr:102719045|pyruvate dehydrogenase E1 component beta subunit [EC:1.2.4.1];K05941|2|7e-06|53.1|mdm:103435918|glutathione gamma-glutamylcysteinyltransferase [EC:2.3.2.15]	GO:0043231//intracellular membrane-bounded organelle	GO:0001071//nucleic acid binding transcription factor activity	GO:0009642//response to light intensity;GO:0009813//flavonoid biosynthetic process;GO:0006355//regulation of transcription, DNA-templated;GO:0032501//multicellular organismal process	gi|685288986|ref|XP_009135446.1|/1.64298e-104/PREDICTED: NAC domain-containing protein 18-like [Brassica rapa]
A3S15	BrScaffold000001_4520	(CT)14	p2	28	TTCTTGACCAAAAGAATCATGG	59.064	ACTCCTTATGGCTCTGCCAA	59.836	134	Bra001687	A03	17885405	17888285	Bra001687	K13173|1|2e-29|132|aly:ARALYDRAFT_312135|arginine and glutamate-rich protein 1;K06174|2|1e-27|125|aly:ARALYDRAFT_897519|ATP-binding cassette, sub-family E, member 1;K02535|3|2e-20|102|aly:ARALYDRAFT_472870|UDP-3-O-[3-hydroxymyristoyl] N-acetylglucosamine deacetylase [EC:3.5.1.108];K15030|5|1e-07|59.7|brp:103856145|translation initiation factor 3 subunit M	-	-	-	gi|685290168|ref|XP_009136036.1|/0/PREDICTED: putative F-box protein At3g17560 [Brassica rapa]
A3S16	BrScaffold000001_5198	(AGG)8	p3	24	CAATGCGCCAGTTAAGACAA	59.872	CTGACTTGTACCTCACGCCA	59.897	251	Bra001925	A03	19398635	19399905	Bra001925	K17894|1|4e-27|123|sita:101775857|GATA-binding protein 2;K19027|2|5e-06|53.1|obr:102720665|zinc finger FYVE domain-containing protein 26	-	-	GO:0048511//rhythmic process	gi|685289855|ref|XP_009135870.1|/7.05339e-104/PREDICTED: GATA transcription factor 1 [Brassica rapa]
A3S48	BrScaffold000013_1607	(GTT)6	p3	18	TTCCCCTTCTGGTTGATCTG	60.042	GCAGTAATTGGGTCAAGCGT	60.14	272	Bra013080	A03	20609047	20610371	Bra013080	-	-	-	GO:0009628//response to abiotic stimulus	gi|674931272|emb|CDY02265.1|/0/BnaA03g39020D [Brassica napus]
A3S17	BrScaffold000013_1198	(ATC)4(AAC)5	c	27	TTTGTCTTTGATGACGCTGC	59.995	ACGCCTCTGTAATGCCTTGT	59.763	245	Bra012939	A03	21438135	21438731	Bra012939	K09286|1|1e-29|129|gmx:100306125|EREBP-like factor	GO:0043231//intracellular membrane-bounded organelle	GO:0003676//nucleic acid binding;GO:0001071//nucleic acid binding transcription factor activity	GO:0006351//transcription, DNA-templated;GO:0006950//response to stress	gi|674931137|emb|CDY02130.1|/3.56012e-103/BnaA03g40370D [Brassica napus]
A3S49	BrScaffold000013_782	(GAG)4(GGAG)3*	c*	20	TTACTCGCACGCTTCCTTTT	60.018	CATCGTCACCCTCCTCTCTC	59.792	271	Bra012785	A03	22307902	22310399	Bra012785	K10268|1|5e-118|158|smo:SELMODRAFT_118815|F-box and leucine-rich repeat protein 2/20	-	-	-	gi|302804087|ref|XP_002983796.1|/2.86408e-117/hypothetical protein SELMODRAFT_118815 [Selaginella moellendorffii]
A3S18	BrScaffold000013_601	(AT)12	p2	24	CGGCCCATTAAAAACTCAAA	59.937	TTCAAGTTTCTGTCATGTATGTGG	59.064	280	Bra012698	A03	22703321	22708032	Bra012698	K18423|1|2e-27|126|aly:ARALYDRAFT_359535|exportin-2 (importin alpha re-exporter);K17964|2|2e-12|76.6|csv:101205583|leucine-rich PPR motif-containing protein, mitochondrial	GO:0043231//intracellular membrane-bounded organelle	GO:0005488	GO:0009725//response to hormone;GO:0009987//cellular process;GO:0007275//multicellular organism development	gi|297834988|ref|XP_002885376.1|/4.57611e-122/hypothetical protein ARALYDRAFT_898463 [Arabidopsis lyrata subsp. lyrata]
A3S50	BrScaffold000013_232	(TCA)8	p3	24	GGAACCGGGTTTGAAATCTT	60.166	ACGCTCTTCAGAGCAAAAGC	59.904	258	Bra012583	A03	23433359	23434717	Bra012583	-	-	GO:0005488	-	gi|685292019|ref|XP_009136949.1|/0/PREDICTED: uncharacterized protein LOC103861006 isoform X3 [Brassica rapa]
A3S20	BrScaffold000027_617	(GTC)6	p3	18	AGGGTGTCGTGAGAATGAGG	60.112	ACTCCACCGTAACCTCAACG	60.028	211	Bra019250	A03	25478426	25478680	Bra019250	-	-	-	-	gi|685292980|ref|XP_009137411.1|/1.88834e-25/PREDICTED: uncharacterized protein LOC103861457 [Brassica rapa]
A3S52	BrScaffold000043_675	(GGAG)3(GA)7*	c*	23	CGAAGCCATGAAGTTAACCA	58.771	TGACTTCTTCTTCACCGCCT	59.989	217	Bra024164	A03	27223969	27229317	Bra024164	-	GO:0043231//intracellular membrane-bounded organelle	GO:0001071//nucleic acid binding transcription factor activity	GO:0006351//transcription, DNA-templated	gi|685293873|ref|XP_009137827.1|/3.50833e-32/PREDICTED: transcription factor bHLH68 [Brassica rapa]
A3S21	BrScaffold000043_63	(GTT)7	p3	21	AACGGATCTGACTTGGCATC	60.081	AAACAAACCTCCCCATCTCC	60.169	229	Bra023967	A03	28589101	28589646	Bra023967	-	-	-	-	gi|685294364|ref|XP_009138062.1|/1.21116e-85/PREDICTED: uncharacterized protein LOC103862105 [Brassica rapa]
A3S22	BrScaffold000023_18	(CCA)6(TCA)10	c	48	GCTTCCATCGCTCTATCACC	59.803	GATGGCGCTACACAACTTCA	59.871	216	Bra017607	A03	29301772	29306900	Bra017607	K14572|1|8e-24|114|brp:103852375|midasin;K01164|2|1e-22|110|vvi:100854265|ribonuclease P/MRP protein subunit POP1 [EC:3.1.26.5];K10396|3|9e-22|105|brp:103872003|kinesin family member 5	-	-	-	gi|685385703|ref|XP_009124787.1|/3.26546e-120/PREDICTED: uncharacterized protein LOC103849808 [Brassica rapa]
A3S23	BrScaffold000023_585	(TCC)10	p3	30	CGTGATGGCTCTTCTTCTCC	59.95	CGCCAGACTGACAAAGACAG	59.616	168	Bra017782	A03	30492719	30494026	Bra017782	K14503|1|2e-86|320|aly:ARALYDRAFT_912686|brassinosteroid resistant 1/2	-	-	-	gi|674871719|emb|CDY62653.1|/5.11545e-97/BnaAnng18240D [Brassica napus]
A4S39	BrScaffold000205_43	(CT)11cggtgc(TG)6	c	40	CGCATTCTCAAGGTAATCCC	59.528	TCTTGAGAGGAACGTCGCTT	60.134	204	Bra040443	A04	38530	39896	Bra040443	-	-	-	GO:0048229//gametophyte development	gi|685295585|ref|XP_009138659.1|/0/PREDICTED: uncharacterized protein LOC103862729 [Brassica rapa]
A4S1	BrScaffold000205_30	(AAG)7	p3	21	ACAGCTCAGCAAACGCCTAT	60.044	ACACTCAAGGATTTCCACCG	59.966	218	Bra040439	A04	48701	50674	Bra040439	K00547|1|2e-96|166|rcu:RCOM_0646290|homocysteine S-methyltransferase [EC:2.1.1.10]	GO:0044464	GO:0008172//S-methyltransferase activity	GO:0006730//one-carbon metabolic process;GO:0000097//sulfur amino acid biosynthetic process;GO:0033477//S-methylmethionine metabolic process	gi|255567526|ref|XP_002524742.1|/9.75365e-96/5-methyltetrahydrofolate:homocysteine methyltransferase, putative [Ricinus communis]
A4S2	BrScaffold000016_6	(GA)11	p2	22	ACTCAACCATGAGGGTTTGC	59.973	GTCATGTGAAGCAGCTCAGG	59.577	178	Bra014378	A04	239228	242853	Bra014378	K14485|1|0.0|850|brp:103862757|transport inhibitor response 1	GO:0031461//cullin-RING ubiquitin ligase complex	GO:0042562//hormone binding;GO:0043178//alcohol binding;GO:0019787//ubiquitin-like protein transferase activity	GO:0010102//lateral root morphogenesis;GO:0048437//floral organ development;GO:0009267//cellular response to starvation;GO:0032446//protein modification by small protein conjugation;GO:0019941//modification-dependent protein catabolic process;GO:0009755//hormone-mediated signaling pathway;GO:0009555//pollen development;GO:0009607//response to biotic stimulus	gi|685295664|ref|XP_009138698.1|/0/PREDICTED: LOW QUALITY PROTEIN: protein TRANSPORT INHIBITOR RESPONSE 1-like [Brassica rapa]
A4S40	BrScaffold000016_228	(CCT)5	p3	15	GATCGAAGAGAAGCAATGGG	59.773	GCAAAGGAGGAGACACGAAG	59.989	181	Bra014444	A04	678944	680455	Bra014444	-	GO:0043231//intracellular membrane-bounded organelle	GO:0003676//nucleic acid binding	-	gi|674890238|emb|CDY42495.1|/1.99126e-59/BnaC04g21860D [Brassica napus]
A4S20	BrScaffold000016_722	(CTC)6	p3	18	AATTCCACGTGGCGAGTAAC	60	ATTTGGGGTTTAGGGGTTTG	59.918	240	Bra014618	A04	1806940	1807974	Bra014618	K00930|1|4e-145|514|brp:103863039|acetylglutamate kinase [EC:2.7.2.8]	GO:0009536//plastid	GO:0016301//kinase activity;GO:0016597//amino acid binding;GO:0016774//phosphotransferase activity, carboxyl group as acceptor	GO:0006560//proline metabolic process;GO:0006526//arginine biosynthetic process;GO:0006796//phosphate-containing compound metabolic process	gi|674944273|emb|CDX88953.1|/2.32734e-144/BnaA04g02330D [Brassica napus]
A4S57	BrScaffold000016_838	(TGT)6	p3	18	CGCGGTACTTAAACCTCTGC	59.904	CCACCACTGGAGCTTCTCTC	59.986	208	Bra014656	A04	2060584	2064200	Bra014656	K03809|1|7e-20|100|brp:103863863|NAD(P)H dehydrogenase (quinone) [EC:1.6.5.2]	GO:0043231//intracellular membrane-bounded organelle	-	-	gi|674957275|emb|CDX76028.1|/3.92181e-40/BnaA04g02920D [Brassica napus]
2S7	BrScaffold000016_1208	(AGG)5	p3	15	TCAGGAGCTTGTGATGATGC	59.95	TTTTGGGTTTGGTCGGAATA	60.16	260	Bra014764	A04	2902053	2904535	Bra014764	K04459|1|6e-145|515|mus:103986176|dual specificity MAP kinase phosphatase [EC:3.1.3.16 3.1.3.48]	-	GO:0008138//protein tyrosine/serine/threonine phosphatase activity	GO:0006970//response to osmotic stress;GO:0006796//phosphate-containing compound metabolic process;GO:0009411//response to UV	gi|685296706|ref|XP_009139186.1|/0/PREDICTED: protein-tyrosine-phosphatase MKP1 [Brassica rapa]
A4S58	BrScaffold000016_1414	(CTT)6c(TCA)6	c	37	CCCTCGGTGGAAGATAACAA	59.926	TTCCTGTCGGAAGAAGGAGA	59.92	227	Bra014818	A04	3374217	3375546	Bra014818	K01183|1|2e-10|52.0|pvu:PHAVU_005G155800g|chitinase [EC:3.2.1.14]	-	-	-	gi|685296827|ref|XP_009139241.1|/1.7838e-90/PREDICTED: protein SHI RELATED SEQUENCE 6-like [Brassica rapa]
A4S41	BrScaffold000016_1484	(AT)12	p2	24	TGGGAGAAAATGTTAAAGGCA	59.573	CTCACCAGACTAGCAGGACAAA	59.538	188	Bra014837	A04	3531652	3533361	Bra014837	-	-	GO:0016741	GO:0006970//response to osmotic stress;GO:0006730//one-carbon metabolic process	gi|685296882|ref|XP_009139261.1|/1.58651e-141/PREDICTED: uncharacterized protein LOC103863257 [Brassica rapa]
A4S21	BrScaffold000016_1501	(GAG)4gaa(GAG)5	c	30	GTGAGATTTGCCACTCGGAT	60.081	GGAAAATGGTGACACCCAAC	60.073	206	Bra014845	A04	3569992	3570758	Bra014845	K15407|1|1e-08|60.5|smo:SELMODRAFT_417998|queuine tRNA-ribosyltransferase subunit QTRTD1 [EC:2.4.2.29]	-	-	-	gi|685297099|ref|XP_009139375.1|/5.18108e-38/PREDICTED: uncharacterized protein LOC103863378 [Brassica rapa]
A4S4	BrScaffold000177_62	(AG)13	p2	26	TGTGATGGGTGGAACAAAAA	59.792	TTTCGACCCCGAGATAAATG	59.894	170	Bra039800	A04	3824367	3828456	Bra039800	-	-	-	-	gi|6729505|emb|CAB67661.1|/0/putative protein [Arabidopsis thaliana]
A4S42	BrScaffold000177_54	(TA)13	p2	26	ATTTTAGTTGCAAGCGTGGG	60.131	TGGCTAATTAAGTTCTCGTCCA	58.899	187	Bra039798	A04	3835736	3843255	Bra039798	K03283|1|1e-54|160|mtr:MTR_2g040220|heat shock 70kDa protein 1/8;K06758|1|1e-54|160|mtr:MTR_2g040220|L1 cell adhesion molecule like protein	-	-	-	gi|674902138|emb|CDY30864.1|/0/BnaC04g27190D [Brassica napus]
A4S22	BrScaffold000088_70	(TGG)5	p3	15	AGGACATTGAAAGCCACGTC	60.119	CGATTTAACGAAGTAGCCGC	59.875	276	Bra033436	A04	4539249	4540581	Bra033436	K08486|1|8e-97|354|brp:103863466|syntaxin 1B/2/3	GO:0043234//protein complex;GO:0016020//membrane	GO:0005515//protein binding	GO:0051707//response to other organism;GO:0009725//response to hormone;GO:0009626//plant-type hypersensitive response;GO:0010185;GO:0006605//protein targeting;GO:0007165//signal transduction	gi|685297290|ref|XP_009139460.1|/4.44482e-96/PREDICTED: syntaxin-122 [Brassica rapa]
A4S43	BrScaffold000088_91	(AC)12	p2	24	CAGCGCCAATACCCTTTCTA	60.223	CCTTTGTTGCCCTGATCATT	59.933	171	Bra033442	A04	4576194	4577470	Bra033442	K02138|1|8e-30|75.9|brp:103863474|F-type H+-transporting ATPase subunit d	-	-	-	gi|685297311|ref|XP_009139469.1|/4.79259e-29/PREDICTED: ATP synthase subunit d, mitochondrial-like [Brassica rapa]
A4S23	BrScaffold000060_166	(TGT)6	p3	18	CGCGGTACTTAGACCTCTGC	60.037	CCACCACTGGAGCTTCTCTC	59.986	208	Bra028143	A04	6437722	6445833	Bra028143	K03809|1|5e-21|105|brp:103863863|NAD(P)H dehydrogenase (quinone) [EC:1.6.5.2]	-	GO:0016788//hydrolase activity, acting on ester bonds	-	gi|674959007|emb|CDX74568.1|/2.89639e-65/BnaA04g08210D [Brassica napus]
A4S45	BrScaffold000060_383	(CA)8	p2	16	AGCATGTGCAGAGTGCAGAC	60.22	AAAGGAAGGCCGATGAGATT	60.039	137	Bra028203	A04	6978205	6979863	Bra028203	K14545|1|2e-38|124|brp:103863799|ribosomal RNA-processing protein 7	-	-	-	gi|674931626|emb|CDY01641.1|/1.41398e-37/BnaC04g31110D [Brassica napus]
A4S6	BrScaffold000048_446	(CAT)9cactctgtatatccacaatttcctctacaacacttcctatgta(TTC)7	c	91	TCCTTCCATCATCATCAGCA	60.161	GGGTTCTCGGCTACTGGACT	60.649	250	Bra025553	A04	8284379	8285059	Bra025553	-	-	-	-	gi|685298508|ref|XP_009140034.1|/1.86685e-107/PREDICTED: ribosome biogenesis protein BOP1 homolog [Brassica rapa]
A4S24	BrScaffold000048_83	(TTG)6	p3	18	TAGATGCCCTTGTTGAACCC	59.933	CCTCCGACAAAAACCATGTC	60.353	256	Bra025450	A04	9033556	9034584	Bra025450	K10442|1|2e-18|94.0|sly:101268156|kelch-like protein 1/4/5;K10457|2|3e-18|93.2|vvi:100267149|kelch-like protein 20;K16726|3|1e-06|54.7|mis:MICPUN_106342|ankyrin repeat domain-containing protein 17	-	-	-	gi|685298752|ref|XP_009140145.1|/1.76532e-144/PREDICTED: B2 protein-like [Brassica rapa]
A4S7	BrScaffold000070_523	(AC)8	p2	16	TAACTCGTCTATGGCCCGTC	60.096	GGCAGAGGAACAAGCTGAAC	59.997	208	Bra030318	A04	9502848	9509697	Bra030318	K13119|1|4e-43|179|brp:103864250|protein FAM50	GO:0043231//intracellular membrane-bounded organelle	-	GO:0007623//circadian rhythm;GO:0000160//phosphorelay signal transduction system;GO:0009640//photomorphogenesis	gi|685298971|ref|XP_009140255.1|/2.17123e-42/PREDICTED: protein XAP5 CIRCADIAN TIMEKEEPER-like isoform X1 [Brassica rapa]
A4S25	BrScaffold000070_405	(GGT)4	p3	12	AGGTGGTAGACGTGAGGGTG	60.026	CCAGACAGCAGAACCAAACA	59.873	162	Bra030284	A04	9735854	9736640	Bra030284	K13195|1|2e-17|90.1|pop:POPTR_0004s16260g|cold-inducible RNA-binding protein	GO:0009536//plastid;GO:0042579//microbody	GO:0004672//protein kinase activity;GO:0004871//signal transducer activity;GO:0016620//oxidoreductase activity, acting on the aldehyde or oxo group of donors, NAD or NADP as acceptor;GO:0042802//identical protein binding;GO:0032559;GO:0043566//structure-specific DNA binding	GO:0006952//defense response;GO:0010118//stomatal movement;GO:0016070//RNA metabolic process;GO:0010038//response to metal ion;GO:0048511//rhythmic process;GO:0006405//RNA export from nucleus;GO:0006970//response to osmotic stress;GO:0009699//phenylpropanoid biosynthetic process;GO:0032392//DNA geometric change;GO:0003006//developmental process involved in reproduction;GO:0006464//cellular protei…	gi|685299060|ref|XP_009140299.1|/6.63594e-20/PREDICTED: glycine-rich RNA-binding protein GRP2A [Brassica rapa]
A4S8	BrScaffold000070_199	(CCT)4ccgccgtccacgcg(CCT)4	c	38	TTAAGGGTTTCGCTGAAGGA	59.817	GTGCCTTCTTGTCGGATGAT	60.081	235	Bra030231	A04	10164057	10165010	Bra030231	K15104|1|6e-140|497|brp:103864359|solute carrier family 25 (mitochondrial oxoglutarate transporter), member 11	GO:0019866//organelle inner membrane;GO:0043231//intracellular membrane-bounded organelle	GO:0046943//carboxylic acid transmembrane transporter activity	GO:0046907//intracellular transport;GO:0046942//carboxylic acid transport	gi|685299204|ref|XP_009140362.1|/3.39092e-139/PREDICTED: mitochondrial uncoupling protein 5 [Brassica rapa]
A4S26	BrScaffold000070_57	(AG)6acggctgcgaagagtcgc(AGG)4	c	42	CAGACTTCATCTCACAGCGG	59.571	TGGTGCTTGAAGCTTTCCTC	60.517	218	Bra030200	A04	10435791	10436812	Bra030200	K09338|1|5e-101|185|brp:103864393|homeobox-leucine zipper protein	GO:0043231//intracellular membrane-bounded organelle	GO:0001071//nucleic acid binding transcription factor activity	GO:0009725//response to hormone;GO:0006351//transcription, DNA-templated	gi|685299274|ref|XP_009140395.1|/2.58325e-100/PREDICTED: homeobox-leucine zipper protein HAT9 isoform X1 [Brassica rapa]
A4S9	BrScaffold000079_327	(AT)9(TTAT)3*	c*	29	AATGAAGCAAATGCCTCCAC	60.081	TTCAATTTTTGTTGGGAGGG	59.772	216	Bra032130	A04	11085583	11087274		-	-	-	-	gi|685299525|ref|XP_009140514.1|//PREDICTED: uncharacterized protein LOC103864511 [Brassica rapa]
A4S27	BrScaffold000079_210	(GGA)8	p3	24	CACCACCGGAGTGAGAAGAT	60.112	TCTCAGCCTTCTCAGCCCTA	60.232	188	Bra032088	A04	11343387	11344968	Bra032088	K10739|1|3e-53|94.7|brp:103864559|replication factor A2	GO:0043231//intracellular membrane-bounded organelle	GO:0005488	GO:0006259//DNA metabolic process	gi|685299625|ref|XP_009140560.1|/1.99229e-52/PREDICTED: replication protein A 32 kDa subunit A [Brassica rapa]
A4S10	BrScaffold000094_95	(TCC)6	p3	18	GGTGGTGATGAAGAGAGGGA	60.048	GCAGTACCTGGTTAGATGGTCC	59.892	248	Bra034284	A04	12009541	12012674	Bra034284	K12125|1|3e-143|510|brp:103864705|protein EARLY FLOWERING 3	GO:0043231//intracellular membrane-bounded organelle	GO:0005515//protein binding	GO:0009648//photoperiodism;GO:0009725//response to hormone;GO:0000902//cell morphogenesis;GO:0009908//flower development;GO:0007602//phototransduction;GO:0050879//multicellular organismal movement;GO:0048511//rhythmic process;GO:0006950//response to stress	gi|685299947|ref|XP_009140718.1|/1.78088e-142/PREDICTED: protein EARLY FLOWERING 3 [Brassica rapa]
A4S48	BrScaffold000094_108	(GGA)6	p3	18	CGCCGTAATCGTAAGAGGAG	59.861	CAATACTCCAACAAGCGCAA	59.872	277	Bra034288	A04	12032241	12035856	Bra034288	K13210|1|4e-69|177|brp:103864711|far upstream element-binding protein	-	-	-	gi|674956319|emb|CDX77029.1|/2.18543e-68/BnaC04g38240D [Brassica napus]
A4S11	BrScaffold000094_146	(AT)6	p2	12	TTTATCAGTCCGGTTTTGCC	59.938	CACCCAAAATGTTGAACCAA	59.268	190	Bra034298	A04	12102013	12104345	Bra034298	K15397|1|0.0|710|brp:103864722|3-ketoacyl-CoA synthase [EC:2.3.1.199]	GO:0043231//intracellular membrane-bounded organelle	GO:0016747//transferase activity, transferring acyl groups other than amino-acyl groups	GO:0009314//response to radiation;GO:0008544//epidermis development;GO:0006950//response to stress;GO:0006631//fatty acid metabolic process	gi|685299982|ref|XP_009140735.1|/0/PREDICTED: LOW QUALITY PROTEIN: 3-ketoacyl-CoA synthase 10-like [Brassica rapa]
A4S49	BrScaffold000094_218	(CCA)5	p3	15	GCCGCTGAAAAGTCAATCTC	59.962	CTGCCATCTCTAAAGCCCAC	59.836	152	Bra034322	A04	12259900	12263108	Bra034322	K01537|1|7e-107|332|sita:101775448|Ca2+-transporting ATPase [EC:3.6.3.8]	GO:0016604//nuclear body;GO:0009536//plastid	GO:0003676//nucleic acid binding;GO:0001071//nucleic acid binding transcription factor activity	GO:0009955//adaxial/abaxial pattern specification;GO:2000026//regulation of multicellular organismal development;GO:0035196//production of miRNAs involved in gene silencing by miRNA;GO:0030422//production of siRNA involved in RNA interference;GO:0006351//transcription, DNA-templated;GO:0006325//chromatin organization	gi|685300039|ref|XP_009140760.1|/4.89187e-171/PREDICTED: serrate RNA effector molecule-like [Brassica rapa]
A4S28	BrScaffold000094_276	(AGG)5	p3	15	TGCCGATAAGGTGAAACACA	60.111	ACTTCAAAAGCCCATGTTGC	60.118	218	Bra034338	A04	12368599	12371626	Bra034338	K08867|1|5e-16|61.6|aly:ARALYDRAFT_674863|WNK lysine deficient protein kinase [EC:2.7.11.1]	GO:0043231//intracellular membrane-bounded organelle	GO:0042802//identical protein binding	GO:0009888//tissue development;GO:0010015//root morphogenesis;GO:0006351//transcription, DNA-templated	gi|685300079|ref|XP_009140783.1|/0/PREDICTED: transcription factor LHW [Brassica rapa]
A4S12	BrScaffold000094_382	(TC)8a(CT)9ca(CT)9cg(CT)6	c	69	TACTCGAGGTGCTGCCTCTT	60.156	TTGGCTGTGTTAGGTCCTTTG	60.154	277	Bra034368	A04	12551382	12552154	Bra034368	-	GO:0009536//plastid	-	-	gi|674902471|emb|CDY30530.1|/1.18044e-13/BnaA04g16030D [Brassica napus]
A4S50	BrScaffold000094_428	(TTTG)4	p4	16	TGCTGGAATACCTTCGCTCT	59.978	GAACGGTATGCTTCCCAGAA	60.074	184	Bra034385	A04	12637590	12646212	Bra034385	K13356|1|1e-92|343|pda:103696395|alcohol-forming fatty acyl-CoA reductase [EC:1.2.1.84];K16196|2|6e-56|221|pda:103708605|eukaryotic translation initiation factor 2-alpha kinase 4 [EC:2.7.11.1];K12819|4|6e-49|198|mdm:103427975|pre-mRNA-processing factor SLU7;K06883|5|5e-48|195|mdm:103443119|uncharacterized protein	-	GO:0005488	-	gi|227438239|gb|ACP30609.1|/0/disease resistance protein [Brassica rapa subsp. pekinensis]
A4S29	BrScaffold000108_8	(AG)9	p2	18	AGCAGAGGCAAAAGCAACAC	60.581	AGACTATGGGGGTCATGCAG	59.95	246	Bra035656	A04	13142675	13143490	Bra035656	-	-	-	-	gi|674884632|emb|CDY47881.1|/7.20637e-19/BnaA07g14260D [Brassica napus]
A4S13	BrScaffold000035_192	(TCT)4cctgtttcttca(TCT)5	c	39	GCTGTTAATCTCTCCCGCAG	59.978	GCTGATGATAGTGATGGCGA	59.788	227	Bra021665	A04	13824003	13829582	Bra021665	K14442|1|1e-76|191|mtr:MTR_1g056490|ATP-dependent RNA helicase DHX36 [EC:3.6.4.13]	GO:0043231//intracellular membrane-bounded organelle	GO:0004386//helicase activity;GO:0042623//ATPase activity, coupled;GO:0032559	-	gi|685300763|ref|XP_009141099.1|/0/PREDICTED: ATP-dependent RNA helicase DHX36 [Brassica rapa]
A4S51	BrScaffold000035_401	(TCA)5	p3	15	AAGGCAAAGGCAAAAGATGA	59.823	GACCAGCCTGATCAAGAAGC	59.957	270	Bra021734	A04	14257192	14258180	Bra021734	K12135|1|2e-08|60.8|ath:AT5G15840|zinc finger protein CONSTANS	GO:0043231//intracellular membrane-bounded organelle	GO:0046914//transition metal ion binding;GO:0001071//nucleic acid binding transcription factor activity;GO:0005515//protein binding	GO:0006970//response to osmotic stress;GO:0006351//transcription, DNA-templated;GO:0009639//response to red or far red light	gi|685300909|ref|XP_009141168.1|/2.60833e-89/PREDICTED: salt tolerance-like protein isoform X1 [Brassica rapa]
A4S30	BrScaffold000035_407	(TTG)5	p3	15	GGACAGCTAATGGGACCAAA	59.933	CCTTGTCTAGCCGACGACTC	60.012	153	Bra021736	A04	14267840	14269228	Bra021736	K00507|1|6e-114|411|brp:103865145|stearoyl-CoA desaturase (delta-9 desaturase) [EC:1.14.19.1]	-	-	-	gi|685300918|ref|XP_009141172.1|/3.22867e-113/PREDICTED: delta-9 acyl-lipid desaturase 2-like [Brassica rapa]
A4S31	BrScaffold000035_601	(TC)14gcctaacttc(A)14	c	52	CAACGGTCCGTAACTGGTCT	60.028	GATCGGAATCGGATGAGAGA	60.119	259	Bra021811	A04	14744870	14749312	Bra021811	K16911|1|1e-65|253|mtr:MTR_1g102430|ATP-dependent RNA helicase DDX21 [EC:3.6.4.13];K00912|3|2e-11|73.2|obr:102706670|tetraacyldisaccharide 4'-kinase [EC:2.7.1.130];K02366|4|2e-06|56.2|bpg:Bathy04g01270|glucuronyl/N-acetylglucosaminyl transferase EXT1 [EC:2.4.1.224 2.4.1.225]	GO:0044464	-	-	gi|685301135|ref|XP_009141272.1|/0/PREDICTED: xyloglucan galactosyltransferase KATAMARI1 homolog [Brassica rapa]
A4S14	BrScaffold000035_707	(ATG)4aggatgatgctgatgatgatggcattttgaagttaagtagt(TGA)4tttcattaagaaactaagtagttgatgt(TGA)6tttcactaagaaactaagtagttgatgatctgatc(TGA)5	c	161	AGCTTGTTTCGCCTCTGAAA	60.132	TCATCAACATCATCAAAACCAA	58.869	245	Bra021864	A04	15028261	15030598	Bra021864	K11649|1|1e-90|271|brp:103865284|SWI/SNF related-matrix-associated actin-dependent regulator of chromatin subfamily C	GO:0070603//SWI/SNF superfamily-type complex	GO:0003676//nucleic acid binding;GO:0005515//protein binding	GO:0016568//chromatin modification	gi|685301269|ref|XP_009141332.1|/6.07967e-90/PREDICTED: SWI/SNF complex subunit SWI3B [Brassica rapa]
A4S32	BrScaffold000021_1208	(AG)7	p2	14	GCTGATCCGGGTATTAACGA	59.923	CCTCTTACAAGCTTCCACCG	59.869	237	Bra017305	A04	15557169	15561049	Bra017305	K13680|1|6e-91|337|tcc:TCM_043600|beta-mannan synthase [EC:2.4.1.32]	-	GO:0019187//beta-1,4-mannosyltransferase activity	-	gi|685301623|ref|XP_009141504.1|/4.87853e-137/PREDICTED: probable mannan synthase 7 [Brassica rapa]
A4S15	BrScaffold000021_971	(GGA)7	p3	21	TCTAACCCGTCTGCGAATCT	59.836	CTGAAGCTTCCTCCGACAAC	59.989	175	Bra017216	A04	16090705	16096365	Bra017216	K05658|1|0.0|777|brp:103865567|ATP-binding cassette, subfamily B (MDR/TAP), member 1 [EC:3.6.3.44]	GO:0016020//membrane	GO:0005515//protein binding;GO:0000166//nucleotide binding;GO:0015562//efflux transmembrane transporter activity;GO:0042626//ATPase activity, coupled to transmembrane movement of substances;GO:0022891//substrate-specific transmembrane transporter activity	GO:0009630//gravitropism;GO:0043479;GO:0009639//response to red or far red light;GO:0051707//response to other organism;GO:0009734//auxin-activated signaling pathway;GO:0032535//regulation of cellular component size;GO:0048437//floral organ development;GO:0060918//auxin transport	gi|685301840|ref|XP_009141619.1|/0/PREDICTED: ABC transporter B family member 1 [Brassica rapa]
A4S33	BrScaffold000021_811	(GGT)8(GGA)6	c	42	GGTGGTTCTGATTTTGGTGG	60.21	AAACACAAGCTAGCTCAAAAACC	59.048	173	Bra017154	A04	16400575	16400943	Bra017154	-	-	-	-	-
A4S52	BrScaffold000021_706	(AAAG)5	p4	20	GCACGAAGGGTTTTGCTATG	60.637	CAAGTGTGATCTCCCCAGGT	59.962	223	Bra017124	A04	16592467	16595059	Bra017124	-	GO:0043231//intracellular membrane-bounded organelle	-	-	gi|674853952|emb|CDY71098.1|/2.63076e-95/BnaAnng36080D [Brassica napus]
A4S34	BrScaffold000021_695	(AT)16a(AT)7	c	47	CCAAATGTGTGAGCACCTGT	59.597	GGAATTGGTCAATACGCTCAA	59.952	238	Bra017120	A04	16618513	16620137	Bra017120	K00430|1|2e-89|128|brp:103865667|peroxidase [EC:1.11.1.7]	GO:0005618//cell wall;GO:0043231//intracellular membrane-bounded organelle	GO:0016209//antioxidant activity;GO:0005506//iron ion binding;GO:0003824//catalytic activity	GO:0042743//hydrogen peroxide metabolic process;GO:0006970//response to osmotic stress;GO:0010038//response to metal ion	gi|674914728|emb|CDY18387.1|/9.13884e-89/BnaA04g22000D [Brassica napus]
2S8	BrScaffold000021_428	(GAA)9	p3	27	CACGAAGGAAGACAACGACA	59.873	TCTGGTCCACCCAATCTCTC	60.048	279	Bra017021	A04	17193197	17194879	Bra017021	K14491|1|8e-07|38.1|cic:CICLE_v10007648mg|two-component response regulator ARR-B family	-	GO:0001071//nucleic acid binding transcription factor activity	GO:0006351//transcription, DNA-templated	gi|685302347|ref|XP_009141879.1|/2.243e-117/PREDICTED: two-component response regulator ARR1-like isoform X2 [Brassica rapa]
A4S16	BrScaffold000021_422	(CCT)8	p3	24	CATCCCCACAACCTTCTCAT	59.779	CGGTAGCTACAAGGAGGACG	59.891	231	Bra017019	A04	17208118	17210732	Bra017019	K04733|1|3e-88|200|egr:104431689|interleukin-1 receptor-associated kinase 4 [EC:2.7.11.1]	GO:0016020//membrane	GO:0016301//kinase activity;GO:0032559	GO:0006464//cellular protein modification process	gi|685302349|ref|XP_009141880.1|/0/PREDICTED: inactive receptor-like serine/threonine-protein kinase At2g40270 [Brassica rapa]
A4S36	BrScaffold000132_240	(GGA)6	p3	18	GGGGAAAGAGAAGAAGTGGG	60.045	TTTGGTCGCGAAGGTAAATC	60.074	195	Bra037734	A04	18088061	18093775	Bra037734	-	-	-	-	gi|685302903|ref|XP_009142162.1|/4.902e-31/PREDICTED: uncharacterized protein LOC103866041 isoform X1 [Brassica rapa]
A4S54	BrScaffold000132_177	(TCT)4	p3	12	CACAGCCTTTAAGCTCCTCG	60.147	TGGTGGTGAGTCGATGAAAA	60.088	137	Bra037718	A04	18192133	18192740	Bra037718	-	-	-	-	gi|674902544|emb|CDY30403.1|/8.71437e-69/BnaA04g25040D [Brassica napus]
A4S17	BrScaffold000132_166	(TCA)4tcctccgcttaccacttctgtggtttgacaagaagtctttggtcaaggaacgatag(AAC)4	c	80	TGTCTATGAGCGGTTTGCTG	60.011	AGAGCATCATCCCCTTTCCT	60.037	214	Bra037712	A04	18215559	18218523	Bra037712	K12840|1|1e-106|145|bdi:100831005|splicing factor 45	-	-	-	gi|674902550|emb|CDY30409.1|/0/BnaA04g25100D [Brassica napus]
A4S18	BrScaffold000163_36	(TTG)8	p3	24	CCAAAGGGAAACAAAACCCT	60.193	GTTTCAGCGCTTGAGCTTCT	59.904	275	Bra039272	A04	18912410	18913492	Bra039272	K16222|1|4e-17|89.7|brp:103855006|Dof zinc finger protein DOF5.5	-	GO:0001071//nucleic acid binding transcription factor activity	GO:0009314//response to radiation;GO:0032501//multicellular organismal process;GO:0006950//response to stress	gi|685303448|ref|XP_009142429.1|/1.52104e-133/PREDICTED: dof zinc finger protein DOF2.5-like [Brassica rapa]
A4S55	BrScaffold000210_34	(AAT)6	p3	18	CTACAGAGATGCATCGGCAA	59.972	GGCTCCTTCCTTTTTCCTTG	60.18	209	Bra040484	A04	19023344	19028048	Bra040484	K12128|1|0.0|305|brp:103866306|pseudo-response regulator 9	GO:0044464	GO:0015075//ion transmembrane transporter activity	GO:0006811//ion transport	gi|685303482|ref|XP_009142448.1|/0/PREDICTED: two-component response regulator-like APRR9 isoform X1 [Brassica rapa]
A4S38	BrScaffold000034_392	(AT)6(TTAT)3	c	24	GAGAAGGTGAAGCCACATCC	59.661	CCTGCATTTTACCACCAAAA	58.531	237	Bra021437	A04	19201720	19203903	Bra021437	K18368|1|5e-17|90.5|pvu:PHAVU_003G140500g|caffeoylshikimate esterase [EC:3.1.1.-]	GO:0016020//membrane	-	-	gi|674876760|emb|CDY55538.1|/1.62029e-127/BnaA04g29600D [Brassica napus]
A5S39	BrScaffold000004_77	(TTG)5	p3	15	CCCGAGGAAGTAGGATGTGA	60.065	CTATGGCTGAGACGGAGAGG	59.966	158	Bra004430	A05	89262	89798	Bra004430	K05770|1|2e-60|231|brp:103843269|benzodiazapine receptor	GO:0044431//Golgi apparatus part	-	GO:0009725//response to hormone;GO:0006970//response to osmotic stress	gi|685303588|ref|XP_009142502.1|/3.13338e-83/PREDICTED: translocator protein homolog [Brassica rapa]
A5S40	BrScaffold000004_428	(AGA)6	p3	18	CCAGATGGTTAGCACCGAAT	59.955	ACGTATCGTCGTCGTCTTCC	60.142	209	Bra004558	A05	797316	798720	Bra004558	-	-	-	-	gi|674953565|emb|CDX79996.1|/1.77404e-110/BnaA05g01600D [Brassica napus]
A5S41	BrScaffold000004_595	(CT)6	p2	12	TGCTGTTTCATCGTGTCTCC	59.837	TTCTAAGCAGACAGGGGCTG	60.529	207	Bra004633	A05	1149878	1151823	Bra004633	K18134|1|3e-155|549|pop:POPTR_0016s05740g|protein O-GlcNAc transferase [EC:2.4.1.255]	-	GO:0016740//transferase activity	-	gi|685304097|ref|XP_009142760.1|/0/PREDICTED: EGF domain-specific O-linked N-acetylglucosamine transferase [Brassica rapa]
A5S42	BrScaffold000004_819	(GAG)5taaccggagagatccagt(GGA)4	c	45	AGCCGCCAAAGAAAACAGTA	59.883	GGAGCTAAGCCATCAACGAG	59.978	246	Bra004740	A05	1597325	1597798	Bra004740	-	-	GO:0001071//nucleic acid binding transcription factor activity	-	gi|674876767|emb|CDY55504.1|/1.23667e-62/BnaA05g34410D [Brassica napus]
A5S21	BrScaffold000004_923	(TA)8	p2	16	TGATCAGCCAATCTTGTTGC	59.805	TGAAATTTGAATATTCCCACTCTG	59.395	182	Bra004776	A05	1792544	1796957	Bra004776	K14411|1|1e-10|70.5|csv:101220676|RNA-binding protein Musashi;K04523|2|8e-07|57.8|brp:103837794|ubiquilin	GO:0016020//membrane	-	-	gi|685304475|ref|XP_009142956.1|/9.65178e-105/PREDICTED: protein IQ-DOMAIN 14-like [Brassica rapa]
A5S43	BrScaffold000004_965	(TCA)4	p3	12	GAAGACAATGCGTTTCCAAAA	60.103	AACGGTTGGAAGGGAACTTT	59.842	227	Bra004800	A05	1874741	1876084	Bra004800	K15032|1|0.0|836|brp:103866764|mTERF domain-containing protein, mitochondrial	-	-	-	gi|685304536|ref|XP_009142989.1|/0/PREDICTED: uncharacterized protein LOC103866764 [Brassica rapa]
A5S2	BrScaffold000004_1118	(CCG)5	p3	15	CGACCAGGTCTTGGATTTGT	59.966	CTAAACCGGACAGCGAAGAG	60.008	187	Bra004859	A05	2158462	2159370	Bra004859	K12501|1|1e-08|61.2|smo:SELMODRAFT_438363|homogentisate solanesyltransferase [EC:2.5.1.117];K09903|2|2e-07|57.4|pop:POPTR_0008s02730g|uridylate kinase [EC:2.7.4.22]	-	-	-	gi|685304671|ref|XP_009143060.1|/6.58427e-129/PREDICTED: uncharacterized protein LOC103866826 [Brassica rapa]
A5S24	BrScaffold000004_1354	(GAG)5	p3	15	ACCAGGAGAAGCAGCGTAAG	59.639	CCCTTGATGTTGTTTTGGGT	59.688	255	Bra004953	A05	2643040	2643861	Bra004953	-	-	-	-	gi|685304961|ref|XP_009143200.1|/5.53296e-137/PREDICTED: uncharacterized protein LOC103866943 [Brassica rapa]
A5S3	BrScaffold000004_1588	(CAAA)7	p4	28	CCTTCTCCTTGTCCATTCCA	60.042	ATCCATACTGGTGGCGAGAC	59.957	202	Bra005031	A05	3072973	3074981	Bra005031	K11713|1|3e-79|94.7|brp:103867030|geranylgeranyl transferase type-1 subunit beta [EC:2.5.1.59]	GO:0043234//protein complex	GO:0004661//protein geranylgeranyltransferase activity;GO:0046983//protein dimerization activity	GO:0018342//protein prenylation;GO:0009738//abscisic acid-activated signaling pathway;GO:0006950//response to stress	gi|685305165|ref|XP_009143304.1|/1.70226e-78/PREDICTED: geranylgeranyl transferase type-1 subunit beta [Brassica rapa]
A5S26	BrScaffold000004_1662	(TCC)5	p3	15	GTCTGAGCCTCTGGACGAAG	60.135	ACTGACTGACGGAATCAGCC	60.269	251	Bra005056	A05	3202051	3204771	Bra005056	-	-	-	-	gi|685305219|ref|XP_009143333.1|/6.73644e-157/PREDICTED: myosin-13 [Brassica rapa]
A5S27	BrScaffold000004_1779	(GAA)4	p3	12	TCGTCTCCAAGAGAACCAGAA	59.974	AGGTGAAAGGGAGCGAGAAT	60.212	274	Bra005104	A05	3439967	3443129	Bra005104	K13424|1|5e-80|300|brp:103867101|WRKY transcription factor 33	GO:0043231//intracellular membrane-bounded organelle	GO:0005488;GO:0001071//nucleic acid binding transcription factor activity	GO:0006952//defense response;GO:0009700//indole phytoalexin biosynthetic process;GO:0009743//response to carbohydrate;GO:0006970//response to osmotic stress;GO:0006351//transcription, DNA-templated	gi|685305315|ref|XP_009143383.1|/2.82996e-79/PREDICTED: probable WRKY transcription factor 33 [Brassica rapa]
A5S28	BrScaffold000004_1980	(TAA)5	p3	15	GATCCTCTGTTCCTTCTGCG	59.95	AGAGTCACCGAGGGAGGTCT	60.258	154	Bra005177	A05	3850124	3851209	Bra005177	K09422|1|1e-180|632|brp:103867176|myb proto-oncogene protein, plant	GO:0031981//nuclear lumen;GO:0005694//chromosome	GO:0003676//nucleic acid binding;GO:0042802//identical protein binding;GO:0001071//nucleic acid binding transcription factor activity	GO:0051707//response to other organism;GO:0010038//response to metal ion;GO:0009725//response to hormone;GO:0006355//regulation of transcription, DNA-templated;GO:0009965//leaf morphogenesis;GO:0009943//adaxial/abaxial axis specification;GO:0051301//cell division;GO:0006970//response to osmotic stress;GO:0031347//regulation of defense response	gi|685305485|ref|XP_009143468.1|/8.26665e-180/PREDICTED: transcription factor AS1 [Brassica rapa]
A5S29	BrScaffold000004_2277	(CAA)5cggtggaaccgagagcggcgtcttta(GTG)4	c	53	ATTTGGAACGCTGAGGAGAA	59.813	AGGAGCTGGAAGTGTCAACG	60.444	231	Bra005287	A05	4559599	4561161	Bra005287	K14432|1|3e-140|454|brp:103867300|ABA responsive element binding factor	-	GO:0003676//nucleic acid binding	GO:0009725//response to hormone;GO:0009845//seed germination;GO:0009628//response to abiotic stimulus;GO:0006355//regulation of transcription, DNA-templated;GO:0009743//response to carbohydrate;GO:0006950//response to stress	gi|685305743|ref|XP_009143603.1|/1.43912e-139/PREDICTED: protein ABSCISIC ACID-INSENSITIVE 5 [Brassica rapa]
A5S44	BrScaffold000004_2463	(TGG)4ttgcagcc(GTG)4	c	32	TCACGCCTCTCTTTCTCTCC	59.679	CCCAAACAGGGTCTAAGCAA	60.103	256	Bra005354	A05	4981712	4984624	Bra005354	K14677|1|9e-57|223|brp:103839955|aminoacylase [EC:3.5.1.14]	GO:0043231//intracellular membrane-bounded organelle	GO:0016811//hydrolase activity, acting on carbon-nitrogen (but not peptide) bonds, in linear amides;GO:0070011//peptidase activity, acting on L-amino acid peptides	GO:0019538//protein metabolic process;GO:0019752//carboxylic acid metabolic process;GO:0010038//response to metal ion	gi|685360360|ref|XP_009114684.1|/5.24085e-56/PREDICTED: aminoacylase-1-like [Brassica rapa]
A5S30	BrScaffold000004_2573	(GAG)4	p3	12	GATAAACCGTCCAAGGGGAT	60.017	GTTGTTGTGCAGGAGCCTTT	60.299	191	Bra005397	A05	5228665	5229932	Bra005397	K08064|1|6e-48|192|brp:103867423|nuclear transcription factor Y, alpha	GO:0005667//transcription factor complex	-	GO:0048506	gi|674901265|emb|CDY31636.1|/3.54559e-47/BnaA05g09110D [Brassica napus]
A5S5	BrScaffold000004_2825	(TCT)6	p3	18	ACGTTTCAAGGAGAGGCAGA	59.989	TCTTCATCCGAGTCTTCTCCA	59.935	224	Bra005489	A05	5786744	5787887	Bra005489	-	-	-	-	gi|674915971|emb|CDY17181.1|/6.1935e-40/BnaA05g10070D [Brassica napus]
A5S45	BrScaffold000004_2886	(AAG)9	p3	27	ACACAATTTAACGGGCAAGC	60.003	TCTTGACAAGCCACTCTGGTT	59.899	253	Bra005510	A05	5883408	5886108		K19613//leucine-rich repeat protein SHOC2;K10406//kinesin family member C2/C3	-	-	GO:0007165//signal transduction	gi|922472142|ref|XP_013635361.1|//PREDICTED: receptor-like protein 12 [Brassica oleracea var. oleracea]
A5S31	BrScaffold000004_3127	(CT)11	p2	22	AAGCCATCTCTGTCCAGGAA	59.803	ATCCTTGGGTCTGGTGTGAG	59.962	254	Bra005596	A05	6434543	6436675	Bra005596	K04123|1|0.0|333|brp:103867649|ent-kaurenoic acid hydroxylase [EC:1.14.13.79]	GO:0043231//intracellular membrane-bounded organelle	GO:0016709//oxidoreductase activity, acting on paired donors, with incorporation or reduction of molecular oxygen, NAD(P)H as one donor, and incorporation of one atom of oxygen;GO:0005506//iron ion binding	GO:0009685//gibberellin metabolic process	gi|685306533|ref|XP_009143990.1|/0/PREDICTED: ent-kaurenoic acid oxidase 2 [Brassica rapa]
A5S32	BrScaffold000025_38	(TGT)8	p3	24	AGCTCTCATTCTGGCCGTTA	59.978	CGATGAACTTTGGGTCGTTT	59.971	267	Bra018250	A05	6933972	6935350	Bra018250	-	GO:0043231//intracellular membrane-bounded organelle	GO:0003677//DNA binding;GO:0001071//nucleic acid binding transcription factor activity	GO:0006351//transcription, DNA-templated	gi|685306975|ref|XP_009144212.1|/2.86538e-94/PREDICTED: probable transcription factor PosF21 [Brassica rapa]
A5S33	BrScaffold000025_378	(GCG)5	p3	15	GTATATCAAGCCTCGTCGGC	59.696	TCCTCTCCCTCCTCTCCTTC	59.883	190	Bra018346	A05	7632628	7633774	Bra018346	K17506|1|5e-101|256|cmo:103497066|protein phosphatase 1L [EC:3.1.3.16]	GO:0043234//protein complex	GO:0004721//phosphoprotein phosphatase activity;GO:0043169//cation binding	GO:0006464//cellular protein modification process	gi|685307231|ref|XP_009144337.1|/3.63236e-169/PREDICTED: probable protein phosphatase 2C 25 [Brassica rapa]
A5S35	BrScaffold000025_683	(GAA)9	p3	27	AGAAGAAAATGGGCATCGTG	60.074	GAGTAGGCTCAGTGCGTTCC	60.02	152	Bra018465	A05	8336678	8338572	Bra018465	K10606|1|5e-38|97.1|bdi:100839769|E3 ubiquitin-protein ligase FANCL [EC:2.3.2.27]	-	-	-	gi|685307528|ref|XP_009144480.1|/9.06241e-119/PREDICTED: putative lipase YOR059C [Brassica rapa]
A5S7	BrScaffold000166_56	(TTG)8	p3	24	GCCTCCGAGATTTGTTTTGA	60.192	CAGTGGTTTCAGCATCGCTA	60.011	106	Bra039488	A05	8751340	8751973	Bra039488	K02221|1|2e-85|298|brp:103868299|YggT family protein	GO:0009534//chloroplast thylakoid	-	GO:0017004//cytochrome complex assembly	gi|685307865|ref|XP_009144649.1|/8.78861e-85/PREDICTED: uncharacterized protein LOC103868299 [Brassica rapa]
A5S38	BrScaffold000071_96	(CTT)9cctctccg(TCT)4	c	47	GCGGTGAAAAGAAGGTGTGT	60.156	AAAAATCACAACATGCACGA	57.602	242	Bra030389	A05	10910145	10910405	Bra030389	-	-	-	-	gi|685308327|ref|XP_009144853.1|/7.14943e-17/PREDICTED: uncharacterized protein LOC103868510 [Brassica rapa]
A5S50	BrScaffold000080_209	(CTG)6	p3	18	CGTACTGCTGCTGTTGTGGT	59.97	AGGAGGTGAAGGGTCTGGTT	59.968	278	Bra032254	A05	12403483	12409137	Bra032254	K11593|1|0.0|269|brp:103868679|eukaryotic translation initiation factor 2C	GO:0043231//intracellular membrane-bounded organelle;GO:0044444//cytoplasmic part	GO:0003723//RNA binding;GO:0004519//endonuclease activity	GO:0009725//response to hormone;GO:0048364//root development;GO:0042445//hormone metabolic process;GO:0045087//innate immune response;GO:0009887//organ morphogenesis;GO:0035194//posttranscriptional gene silencing by RNA;GO:0048468//cell development;GO:0003006//developmental process involved in reproduction;GO:0009639//response to red or far red light	gi|685308690|ref|XP_009145006.1|/0/PREDICTED: protein argonaute 1-like [Brassica rapa]
A5S9	BrScaffold000009_1783	(AAG)6aggaggac(GAG)6	c	44	GGAAGAAGCAGGTCTCGATG	59.95	CAGCTTTCCAGTCTCTTGGG	59.982	266	Bra010177	A05	14929103	14929552	Bra010177	-	-	-	-	gi|674906141|emb|CDY26909.1|/2.34814e-60/BnaA05g18030D [Brassica napus]
A5S51	BrScaffold000009_1757	(AAG)9	p3	27	AGTGGGTTTCCGTCAGATTG	59.966	CACAAGCCTCTTTCTCCGAC	59.989	270	Bra010169	A05	15010288	15012036	Bra010169	K09015|1|2e-139|496|brp:103874752|Fe-S cluster assembly protein SufD	-	-	GO:0031163	gi|685323485|ref|XP_009151436.1|/1.34365e-138/PREDICTED: protein ABCI7, chloroplastic [Brassica rapa]
A5S10	BrScaffold000183_10	(CAG)5cttatgcaacaa(CAG)4	c	39	CTTGGTTCTGCTATGCCACA	59.864	GATCAGGAAAACCACTCCCA	59.903	244	Bra039947	A05	16503119	16508849	Bra039947	-	GO:0043231//intracellular membrane-bounded organelle	-	GO:0007623//circadian rhythm	gi|685309432|ref|XP_009145333.1|/0/PREDICTED: protein TIME FOR COFFEE-like [Brassica rapa]
A5S54	BrScaffold000075_410	(ATC)7	p3	21	GAACGACGTTGGTGTCTCCT	60.159	TCCTGAGATCCTTTGATGCC	60.158	123	Bra031337	A05	16609039	16611564	Bra031337	K05658|1|1e-71|272|mdm:103423936|ATP-binding cassette, subfamily B (MDR/TAP), member 1 [EC:3.6.3.44];K13963|2|9e-10|66.6|bvg:104905047|serpin B;K03065|3|7e-08|60.5|atr:18422502|26S proteasome regulatory subunit T5	-	GO:0005488	-	gi|685309604|ref|XP_009145416.1|/0/PREDICTED: uncharacterized protein LOC103869107 [Brassica rapa]
A5S55	BrScaffold000037_825	(TTA)9ctagtttcacaaacgatcgtgtttatgttttgttctttagccctaagagatccaagagagatgggaaacct(GAA)5	c	113	TCCCTTTCCCTTCTTCTTCT	57.05	GAGCAGCATCTCTCAGGGAC	60.104	232	Bra022442	A05	18383114	18384686	Bra022442	K01181|1|6e-11|69.7|mtr:MTR_1g106800|endo-1,4-beta-xylanase [EC:3.2.1.8]	-	-	-	gi|685310321|ref|XP_009145764.1|/9.76021e-85/PREDICTED: bcl-2-associated transcription factor 1-like [Brassica rapa]
A5S57	BrScaffold000037_549	(TTC)6	p3	18	TATCCCTTTCCCAACAACCA	60.162	GCTGGAGAAGAAAGCCAGTG	60.134	244	Bra022336	A05	19041117	19044241	Bra022336	K13179|1|3e-127|163|brp:103869547|ATP-dependent RNA helicase DDX18/HAS1 [EC:3.6.4.13]	GO:0031981//nuclear lumen	GO:0042623//ATPase activity, coupled;GO:0032559	-	gi|674941279|emb|CDX92251.1|/1.5662e-126/BnaA05g21560D [Brassica napus]
A5S12	BrScaffold000037_509	(GTG)6	p3	18	TAGTCCTTGTGCTGTGACGC	60.056	CCAGCAAACACAACACATCC	60.008	162	Bra022325	A05	19110807	19112459	Bra022325	K01381|1|4e-11|70.5|smo:SELMODRAFT_13348|saccharopepsin [EC:3.4.23.25];K00924|4|7e-11|69.7|tcc:TCM_041550|	-	GO:0004175//endopeptidase activity	GO:0019538//protein metabolic process	gi|685310576|ref|XP_009145889.1|/2.41362e-156/PREDICTED: protein ASPARTIC PROTEASE IN GUARD CELL 1 [Brassica rapa]
A5S13	BrScaffold000055_76	(CTC)4atcctcctctcc(CTT)5	c	39	ATTGCGATTGATTAGCCACC	59.929	ACGCTTGGAGATAGCGACAT	59.866	187	Bra027196	A05	20345506	20348101	Bra027196	K12472|1|5e-12|74.3|ota:Ot15g00490|epidermal growth factor receptor substrate 15;K09291|4|4e-08|61.2|sot:102595890|nucleoprotein TPR;K10406|5|7e-08|60.5|cmo:103487162|kinesin family member C2/C3	GO:0009534//chloroplast thylakoid;GO:0009295//nucleoid	-	-	gi|685311211|ref|XP_009146180.1|/0/PREDICTED: MAR-binding filament-like protein 1 [Brassica rapa]
A5S58	BrScaffold000055_644	(GAT)9	p3	27	GAAACTCCTGAGGGAAAGGC	60.19	CAATACCAAGCCCCTACGAG	59.587	277	Bra027429	A05	21603768	21606896	Bra027429	K04567|1|7e-99|147|brp:103870126|lysyl-tRNA synthetase, class II [EC:6.1.1.6]	GO:0009536//plastid	GO:0016876//ligase activity, forming aminoacyl-tRNA and related compounds;GO:0000166//nucleotide binding	GO:0006412//translation;GO:0003006//developmental process involved in reproduction	gi|685311845|ref|XP_009146484.1|/3.87303e-98/PREDICTED: probable lysine--tRNA ligase, cytoplasmic [Brassica rapa]
A5S60	BrScaffold000098_142	(AT)10	p2	20	TCTTTTCTTGCAACTCTTTCCA	59.131	TACCAAGCTTCCGTCTGACC	60.255	266	Bra034744	A05	21971375	21974953	Bra034744	K03260|1|3e-06|37.7|obr:102720157|translation initiation factor 4G	GO:0043231//intracellular membrane-bounded organelle	GO:0046914//transition metal ion binding;GO:0003676//nucleic acid binding	-	gi|685312071|ref|XP_009146599.1|/3.29802e-64/PREDICTED: zinc finger CCCH domain-containing protein 37 isoform X2 [Brassica rapa]
A5S61	BrScaffold000098_168	(ACC)6ggcggctcggcttgctctcgggggactcacggcgaggagagaggaagagaaccaacggaaagagaaa(GGAGAG)3	c	103	ATCTGGTCACCACCACAACA	59.846	TTCTTCTCTCACGCCTCCTC	59.679	200	Bra034754	A05	22012226	22017526	Bra034754	K01183|1|2e-85|318|brp:103870249|chitinase [EC:3.2.1.14]	GO:0043231//intracellular membrane-bounded organelle;GO:0031090//organelle membrane	GO:0030247//polysaccharide binding;GO:0004553//hydrolase activity, hydrolyzing O-glycosyl compounds	GO:0010038//response to metal ion;GO:0006026;GO:0009861//jasmonic acid and ethylene-dependent systemic resistance	gi|674924726|emb|CDY08428.1|/1.34413e-84/BnaA05g26640D [Brassica napus]
A5S62	BrScaffold000098_186	(AG)13	p2	26	CACAATGCACTGAAACAGCA	59.457	GTGGCTCTTGGGAACTCAAA	60.232	260	Bra034768	A05	22060445	22061580	Bra034768	-	-	GO:0003676//nucleic acid binding	GO:0006259//DNA metabolic process	gi|685312137|ref|XP_009146632.1|/3.16893e-72/PREDICTED: uncharacterized protein LOC103870264 [Brassica rapa]
A5S63	BrScaffold000098_319	(AT)9(TA)6	c	30	TTGAGCCGAATAATGGTTGA	59.112	TCCTACCTGCTCCATTGCTT	59.836	243	Bra034828	A05	22344230	22346424	Bra034828	K09287|1|6e-36|153|gmx:100776987|RAV-like factor	GO:0043231//intracellular membrane-bounded organelle	GO:0003676//nucleic acid binding;GO:0001071//nucleic acid binding transcription factor activity	GO:0006351//transcription, DNA-templated	gi|685312285|ref|XP_009146703.1|/3.86063e-93/PREDICTED: B3 domain-containing protein At3g11580 [Brassica rapa]
A5S64	BrScaffold000098_410	(AT)9	p2	18	TGTTCACCGCATGAATGAAA	61.06	ACAATCAGATGGAAACCCCA	60.173	212	Bra034862	A05	22505597	22511829	Bra034862	K10257|1|4e-92|128|brp:103870371|omega-3 fatty acid desaturase (delta-15 desaturase) [EC:1.14.19.-]	GO:0009526//plastid envelope	GO:0016705//oxidoreductase activity, acting on paired donors, with incorporation or reduction of molecular oxygen	GO:0006631//fatty acid metabolic process	gi|674932376|emb|CDY00999.1|/7.69485e-92/BnaC05g42010D [Brassica napus]
A5S16	BrScaffold000067_584	(AGG)6	p3	18	CACCTCAGCCTCATTACGGT	60.134	GAGGTAGCGGATCAGGAGTG	59.827	197	Bra029867	A05	22662986	22664648	Bra029867	K02865|1|3e-24|114|sita:101759799|large subunit ribosomal protein L10Ae	-	-	-	gi|685312484|ref|XP_009146806.1|/2.82338e-130/PREDICTED: cAMP-regulated phosphoprotein 21-like isoform X1 [Brassica rapa]
A5S66	BrScaffold000067_426	(GGA)5gggggata(GTG)5	c	38	CGGGTTCAAGCTTCAAAGAC	59.853	GTACCCCGGCTACTACCCTC	59.848	251	Bra029788	A05	22999334	23000732	Bra029788	K10604|1|9e-61|184|pvu:PHAVU_007G220900g|E3 ubiquitin-protein ligase MGRN1 [EC:2.3.2.27]	GO:0016020//membrane	GO:0046872//metal ion binding	-	gi|685312659|ref|XP_009146899.1|/1.72883e-88/PREDICTED: probable E3 ubiquitin-protein ligase LOG2 [Brassica rapa]
A5S67	BrScaffold000067_404	(ATC)7	p3	21	ATCCTTGACCCTCCCCATAC	60.015	TTTATCAGACGCTGGTGCTG	60.011	158	Bra029774	A05	23050779	23054086	Bra029774	K15728|1|0.0|701|brp:103870537|phosphatidate phosphatase LPIN [EC:3.1.3.4]	-	GO:0016791//phosphatase activity	GO:0009267//cellular response to starvation	gi|685312701|ref|XP_009146922.1|/0/PREDICTED: phosphatidate phosphatase PAH1 [Brassica rapa]
A5S17	BrScaffold000067_311	(TAT)10	p3	30	ATGGGATGATCAGAAAAGCG	60.036	AGGATCGCGACAGACAATTT	59.7	263	Bra029711	A05	23290504	23293651	Bra029711	K03671|1|3e-64|248|brp:103859332|thioredoxin 1;K06689|3|4e-61|237|brp:103870601|ubiquitin-conjugating enzyme E2 D/E [EC:2.3.2.23]	-	GO:0019787//ubiquitin-like protein transferase activity	GO:0019941//modification-dependent protein catabolic process;GO:0032446//protein modification by small protein conjugation	gi|685288283|ref|XP_009135091.1|/1.65766e-63/PREDICTED: thioredoxin H9 isoform X1 [Brassica rapa]
A5S69	BrScaffold000067_241	(AT)13	p2	26	TTTTTGCAGCAGAGGTCTCA	59.716	TTTCAGGACCTAGACGTTACCAA	60.042	241	Bra029678	A05	23423261	23426596	Bra029678	K09487|1|7e-06|54.3|brp:103870635|heat shock protein 90kDa beta	GO:0043231//intracellular membrane-bounded organelle	GO:0042802//identical protein binding;GO:0046983//protein dimerization activity	GO:0010074//maintenance of meristem identity;GO:0010015//root morphogenesis;GO:0003006//developmental process involved in reproduction;GO:0010467//gene expression;GO:0046739//transport of virus in multicellular host	gi|685312912|ref|XP_009147029.1|/7.09752e-113/PREDICTED: protein OBERON 1 [Brassica rapa]
A5S70	BrScaffold000067_133	(ATG)7aagac(GAG)4	c	38	AGGATCTGTTGCAGATTGGG	60.073	CTCCCCCTAACAACCTCCTC	59.928	232	Bra029633	A05	23620124	23622310	Bra029633	K00988|1|4e-19|97.4|vcn:VOLCADRAFT_92922|ATP adenylyltransferase [EC:2.7.7.53]	-	-	-	gi|685313035|ref|XP_009147095.1|/7.7168e-110/PREDICTED: uncharacterized protein LOC103870688 [Brassica rapa]
A5S18	BrScaffold000165_38	(GCT)5(GTT)4	c	27	CTCAACCAATGGGGTTGTCT	59.82	TACTGGCAGCTTGTGGACTG	60.049	223	Bra039418	A05	24242751	24244054	Bra039418	K17586|1|2e-09|64.7|egu:105061080|PHD and RING finger domain-containing protein 1	-	GO:0046872//metal ion binding	GO:0006351//transcription, DNA-templated	gi|685313254|ref|XP_009147209.1|/1.04495e-142/PREDICTED: uncharacterized protein LOC103870797 [Brassica rapa]
A5S77	BrScaffold000165_102	(TTG)6	p3	18	CCACCATATCCTCCATGAGC	60.303	GGGTATGATGGGACACCAAG	60.05	222	Bra039452	A05	24365889	24368229	Bra039452	-	-	GO:0043169//cation binding	-	gi|685313358|ref|XP_009147263.1|/1.3729e-19/PREDICTED: RNA-binding protein cabeza-like [Brassica rapa]
A5S72	BrScaffold000165_141	(GAG)7	p3	21	ATCTCCCAAAGCAAGCAAGA	59.955	GTTGACGCGGTAGAGAGAGG	60.012	176	Bra039462	A05	24429632	24432057	Bra039462	K02974|1|5e-31|137|mtr:MTR_7g114640|small subunit ribosomal protein S24e;K01213|2|1e-15|57.8|mus:104000550|galacturan 1,4-alpha-galacturonidase [EC:3.2.1.67];K01184|5|8e-11|70.1|csv:101207212|polygalacturonase [EC:3.2.1.15]	GO:0044464	GO:0004553//hydrolase activity, hydrolyzing O-glycosyl compounds	GO:0044238//primary metabolic process;GO:0045229//external encapsulating structure organization	gi|685313382|ref|XP_009147277.1|/7.91707e-171/PREDICTED: probable polygalacturonase [Brassica rapa]
A5S73	BrScaffold000078_509	(GA)13	p2	26	TTGTCTTTTGCTGGGATCTGT	59.726	AGCTAAGCTTATCCGCTCCC	59.972	277	Bra031974	A05	24622380	24624933	Bra031974	K00549|1|2e-11|72.0|egu:105042372|5-methyltetrahydropteroyltriglutamate--homocysteine methyltransferase [EC:2.1.1.14]	-	-	-	gi|674880472|emb|CDY51750.1|/2.56896e-43/BnaA05g32740D [Brassica napus]
A5S74	BrScaffold000160_113	(TC)8	p2	16	AGTCATCCCGAGCATCACAT	60.507	GTAAGACATGATGGCCGGTT	59.82	276	Bra039144	A05	25140828	25143400	Bra039144	K01739|1|2e-132|169|jcu:105644089|cystathionine gamma-synthase [EC:2.5.1.48]	GO:0009536//plastid	GO:0016765//transferase activity, transferring alkyl or aryl (other than methyl) groups	-	gi|643714817|gb|KDP27172.1|/1.36412e-131/hypothetical protein JCGZ_19871 [Jatropha curcas]
A6S75	BrScaffold000160_33	(TCC)7	p3	21	CCTTCTCAGCCTTCTCTCCA	59.673	GGGTGATGATAGGAGCAGGA	60.034	163	Bra039113	A05	25263695	25267349	Bra039113	K01673|1|4e-41|171|brp:103870985|carbonic anhydrase [EC:4.2.1.1]	GO:0009532//plastid stroma;GO:0009526//plastid envelope;GO:0009534//chloroplast thylakoid;GO:0005576//extracellular region	GO:0005488	GO:0010035//response to inorganic substance;GO:0010118//stomatal movement;GO:0050832//defense response to fungus	gi|685313676|ref|XP_009147437.1|/2.3273e-40/PREDICTED: beta carbonic anhydrase 1, chloroplastic [Brassica rapa]
A5S76	BrScaffold000160_5	(ATG)9	p3	27	TGAGTCTGTGAAGGCTGTGG	60.022	ATTTGATGGGAGGAGGGAAC	60.133	253	Bra039105	A05	25290838	25293079	Bra039105	K16280|1|1e-116|134|gmx:100819098|E3 ubiquitin-protein ligase RGLG [EC:2.3.2.27]	GO:0016020//membrane	GO:0046872//metal ion binding	GO:0042445//hormone metabolic process;GO:0006725//cellular aromatic compound metabolic process	gi|356570204|ref|XP_003553280.1|/5.81705e-116/PREDICTED: E3 ubiquitin-protein ligase RGLG2-like isoform X1 [Glycine max]
A6s1	BrScaffold000137_209	(TC)13gctga(CT)6	c	43	GCTCTCTTTGCTCCTCCAAA	59.694	GAGAGCACGGAGACCTGAAC	59.993	124	Bra038019	A06	96605	97759	Bra038019	-	-	-	-	gi|685313768|ref|XP_009147477.1|/2.16789e-32/PREDICTED: calphotin-like [Brassica rapa]
A6s2	BrScaffold000173_92	(CTTGT)3cctgtcc(TGTCT)5tgccttgtcttgtctc(GTCTT)4	c	83	AGGGCATTACATTGAAACCG	59.823	GGCACTGCATGACTGAGAAA	59.992	197	Bra039684	A06	546909	547613	Bra039684	-	-	-	-	gi|674872046|emb|CDY62200.1|/2.99136e-10/BnaA06g01490D [Brassica napus]
2s11	BrScaffold000026_870	(TTC)4	p3	12	TGACGCAGACAGGAGCATAC	60.016	GCGAGAACACAACAAAGCAA	60.035	168	Bra018907	A06	1339416	1339724	Bra018907	-	GO:0044436;GO:0009534//chloroplast thylakoid	-	GO:0006950//response to stress;GO:0042221//response to chemical;GO:0009411//response to UV	gi|685314353|ref|XP_009147771.1|/6.15886e-29/PREDICTED: photosystem II 5 kDa protein, chloroplastic [Brassica rapa]
A6s3	BrScaffold000026_530	(TCA)5	p3	15	GACAATGGCTGGAGTAGGGA	60.073	AGCAACTCCAAGATGATGGG	60.073	157	Bra018772	A06	2076368	2077419	Bra018772	K08869|1|3e-16|86.7|cre:CHLREDRAFT_165812|aarF domain-containing kinase	-	GO:0001071//nucleic acid binding transcription factor activity	GO:0009725//response to hormone;GO:0006970//response to osmotic stress;GO:0010038//response to metal ion	gi|685314639|ref|XP_009147920.1|/1.68809e-65/PREDICTED: transcription factor DIVARICATA-like [Brassica rapa]
A6s4	BrScaffold000029_564	(CAA)4t(AAC)5	c	28	AGGCCTTTGAATGAGGGAAT	59.903	TCCCATCATACCCTGTGGAT	60.011	279	Bra019816	A06	4279892	4281025	Bra019816	K14398|1|3e-46|186|brp:103871953|cleavage and polyadenylation specificity factor subunit 6/7	-	GO:0003676//nucleic acid binding	-	gi|685315832|ref|XP_009148538.1|/1.66247e-45/PREDICTED: heterogeneous nuclear ribonucleoprotein 87F [Brassica rapa]
A6s5	BrScaffold000050_560	(CA)12	p2	24	TGCAATGCCAGTAGTCGAAG	60.011	TGAGGAATCTTGCAAACCAA	59.247	244	Bra026164	A06	5517038	5517486	Bra026164	K00416|1|1e-28|80.9|eus:EUTSA_v10009667mg|ubiquinol-cytochrome c reductase subunit 6	GO:0043231//intracellular membrane-bounded organelle	GO:0015078//hydrogen ion transmembrane transporter activity	GO:0022904//respiratory electron transport chain	gi|674251003|gb|KFK43768.1|/2.41293e-34/hypothetical protein AALP_AA1G170400 [Arabis alpina]
A6s6	BrScaffold000049_204	(CCG)7gctcgtttctcctggattagattatccgcgaaatcagaaagagaagag(GAA)4	c	81	CCTGGGAGTTCTTTTGACCA	60.081	CGGCATTGAGAACCCTAAAC	59.569	232	Bra025722	A06	7202953	7203473	Bra025722	-	-	-	-	gi|674906331|emb|CDY26688.1|/1.27079e-14/BnaA06g13340D [Brassica napus]
A6s7	BrScaffold000024_139	(GAA)4gaggaagaggaagacatgcattatctagatgatggtaagggagaagg(AGA)6	c	77	CAACCGACATTTTTCACACG	60.004	TGGTCTTCATCGACAGTTGC	59.837	197	Bra017959	A06	8788697	8791503	Bra017959	-	-	-	-	gi|685318667|ref|XP_009149706.1|/2.30164e-114/PREDICTED: pentatricopeptide repeat-containing protein At3g49730-like [Brassica rapa]
A6s8	BrScaffold000143_28	(ATC)7	p3	21	GAGAGAACTCGGCACCAGAC	59.993	AACTGTTTCGTGGAGTTGGG	60.005	259	Bra038273	A06	11042627	11045878	Bra038273	K11671|1|0.0|2002|brp:103873402|nuclear factor related to kappa-B-binding protein	-	-	-	gi|685319694|ref|XP_009150058.1|/0/PREDICTED: uncharacterized protein LOC103873402 [Brassica rapa]
A6S73	BrScaffold000044_595	(TCT)5acatcctcagcttgcacgttgacaaatctagat(GAA)4	c	60	CGCTCACAGCATCTGAACTC	59.733	GCTAATGCTGCAGTGGTTGA	60.019	280	Bra024429	A06	16363573	16364977	Bra024429	-	-	-	-	gi|685321410|ref|XP_009150678.1|/0/PREDICTED: uncharacterized protein LOC103874029 [Brassica rapa]
A6S83	BrScaffold000009_461	(AC)7	p2	14	TGCGGCATTAGTTGTCAGTC	59.871	GCGGTGGTCAAGTTTTCTTC	59.717	280	Bra009803	A06	17991841	17995336	Bra009803	K10717|1|2e-82|308|smo:SELMODRAFT_186869|cytokinin trans-hydroxylase	GO:0044464	GO:0016491//oxidoreductase activity;GO:0005506//iron ion binding	GO:0008152//metabolic process	gi|674945344|emb|CDX88144.1|/0/BnaA06g27350D [Brassica napus]
A6S88	BrScaffold000009_674	(TG)13	p2	26	TTGTGGAAGCAAGAGCAATG	59.988	AGCCACAAACCAAAATCAGC	60.118	267	Bra009866	A06	18391953	18395465	Bra009866	K00029|1|0.0|165|tcc:TCM_037219|malate dehydrogenase (oxaloacetate-decarboxylating)(NADP+) [EC:1.1.1.40]	-	GO:0016614//oxidoreductase activity, acting on CH-OH group of donors;GO:0005488	GO:0008152//metabolic process	gi|590573602|ref|XP_007012167.1|/0/NADP-malic enzyme 4 [Theobroma cacao]
A6S97	BrScaffold000129_114	(CCA)4	p3	12	GGACAAGCATCACCCTCATC	60.484	CACTTGGAACGTCTCGAAAGA	60.416	198	Bra037460	A06	20207624	20209702	Bra037460	K03294|1|3e-90|295|sita:101754459|basic amino acid/polyamine antiporter, APA family	GO:0016020//membrane	GO:0060089	GO:0023052//signaling;GO:0009314//response to radiation	gi|685324074|ref|XP_009151678.1|/0/PREDICTED: BTB/POZ domain-containing protein At5g48800 [Brassica rapa]
A6s15	BrScaffold000129_179	(GGA)5gcaggagctttgctcgaaaccggagcgagatggacttgagttcgcggagctagctaaagaagctagaggagagaagaac(TCT)5tcg(TCT)4	c	124	AGTCATGGAGAAGGACCTCG	59.254	GAGTTTCGTCAAGCCTCCTG	59.989	265	Bra037491	A06	20333710	20336366	Bra037491	K02184|1|3e-51|152|dosa:Os05t0104000-00|formin 2	-	-	-	gi|685323977|ref|XP_009151637.1|/0/PREDICTED: formin-like protein 9 [Brassica rapa]
A6S99	BrScaffold000129_208	(GAG)4	p3	12	CCTCCCGTGATTCCAGACTA	60.065	CTCTCCACGGTCTACCTCCA	60.252	251	Bra037502	A06	20377076	20379057	Bra037502	K01609|1|8e-154|271|brp:103874936|indole-3-glycerol phosphate synthase [EC:4.1.1.48]	GO:0009532//plastid stroma	-	-	gi|685323943|ref|XP_009151623.1|/4.42928e-153/PREDICTED: indole-3-glycerol phosphate synthase, chloroplastic [Brassica rapa]
A6S100	BrScaffold000129_262	(ATG)4	p3	12	AGTACAAGCGTTTCGGCTGT	59.943	CTTGGTGGTGGACCATATCC	60.05	220	Bra037523	A06	20469423	20470727	Bra037523	K03265|1|0.0|839|brp:103874912|peptide chain release factor subunit 1	GO:0044424	GO:0003747//translation release factor activity	GO:0006412//translation	gi|685323852|ref|XP_009151586.1|/0/PREDICTED: eukaryotic peptide chain release factor subunit 1-1 [Brassica rapa]
A6s36	BrScaffold000047_642	(AGA)5	p3	15	CTAGATCTCACGGGGCAGAG	59.966	AAGCTGACCATAACCCATCG	59.955	169	Bra025340	A06	21022699	21024276	Bra025340	K08900|1|4e-143|508|pop:POPTR_0985s00200g|mitochondrial chaperone BCS1	-	GO:0017111//nucleoside-triphosphatase activity;GO:0032559	-	gi|685324542|ref|XP_009151865.1|/0/PREDICTED: uncharacterized protein LOC103875145 isoform X1 [Brassica rapa]
A6s37	BrScaffold000047_572	(AGG)4	p3	12	AGAGGAGGAGGAAAGGCTTG	59.95	GCGACGACTAGTTCGCTTCT	59.786	244	Bra025312	A06	21173651	21176276	Bra025312	K08669|1|2e-09|63.2|eus:EUTSA_v10004245mg|HtrA serine peptidase 2 [EC:3.4.21.108]	GO:0044436;GO:0009534//chloroplast thylakoid	GO:0004175//endopeptidase activity	GO:0009057//macromolecule catabolic process;GO:0009765//photosynthesis, light harvesting;GO:0019538//protein metabolic process	gi|674947307|emb|CDX86460.1|/1.96544e-87/BnaA06g31770D [Brassica napus]
A6s38	BrScaffold000047_560	(AGAAGG)3	p6	18	GAGGAGACGGTGGAGAATCA	60.199	CGGCTAACGTTGGAGAAAAG	59.876	255	Bra025308	A06	21192129	21192926	Bra025308	-	-	-	-	gi|674947310|emb|CDX86463.1|/4.49974e-80/BnaA06g31800D [Brassica napus]
A6s39	BrScaffold000047_464	(AAG)4	p3	12	CTTCACGCTTTGGAGACACA	60.025	AAACACCGGTTTGTTCTTGG	59.869	192	Bra025270	A06	21401250	21402691	Bra025270	-	GO:0016020//membrane	-	-	gi|685324792|ref|XP_009151969.1|/1.88928e-63/PREDICTED: uncharacterized protein LOC103875225 [Brassica rapa]
A6S26	BrScaffold000047_456	(GAA)6	p3	18	CGCGGACAGATTCAGTTACA	59.864	CGGTCTGATGTTCGTTGATG	60.112	188	Bra025265	A06	21421501	21423126	Bra025265	K15627|1|2e-26|77.4|cic:CICLE_v10016175mg|tether containing UBX domain for GLUT4	-	-	GO:0032984;GO:0040007//growth	gi|567909707|ref|XP_006447167.1|/8.98555e-26/hypothetical protein CICLE_v10016175mg [Citrus clementina]
A6s41	BrScaffold000047_413	(TTCGG)3	p5	15	GATTACGGGTGTTCAATCCG	60.192	AAAGCAACAAGATTGGCTGA	58.502	180	Bra025250	A06	21504399	21508094	Bra025250	K07393|1|5e-33|106|zma:103636678|putative glutathione S-transferase	GO:0009536//plastid	GO:0004175//endopeptidase activity	GO:0019538//protein metabolic process	gi|565379206|ref|XP_006356019.1|/4.77363e-102/PREDICTED: uncharacterized protein LOC102585296 isoform X1 [Solanum tuberosum]
A6s43	BrScaffold000047_398	(CTG)4	p3	12	CCTGCCTTCCACTTTGATGT	60.111	ACCGGCTGAGGTTAAGGATT	59.962	136	Bra025244	A06	21530080	21531003	Bra025244	K16221|1|4e-26|119|ath:AT5G08330|transcription factor TCP21 (protein CCA1 HIKING EXPEDITION);K13035|5|1e-13|77.4|tcc:TCM_022798|beta-cyano-L-alanine hydratase/nitrilase [EC:3.5.5.4 4.2.1.65]	-	GO:0001071//nucleic acid binding transcription factor activity	GO:0010467//gene expression;GO:0032502//developmental process	gi|685324859|ref|XP_009151998.1|/1.75761e-145/PREDICTED: transcription factor TCP20-like [Brassica rapa]
A6s44	BrScaffold000047_391	(CGT)5	p3	15	ATGGCGACGGATAACATCTC	59.923	TTGCTTCTGTTGACGCTACG	60.195	234	Bra025239	A06	21541308	21543544	Bra025239	-	-	-	-	gi|685324871|ref|XP_009152003.1|/4.17246e-137/PREDICTED: uncharacterized protein LOC103875260 [Brassica rapa]
A6S28	BrScaffold000047_358	(ATC)9	p3	27	GGTCCAAACGTGAAGACCAT	59.827	AACAGTGACGTCAGCTCCCT	59.907	194	Bra025229	A06	21597487	21599311	Bra025229	-	-	GO:0003676//nucleic acid binding	GO:0009725//response to hormone;GO:0009686//gibberellin biosynthetic process;GO:0009688//abscisic acid biosynthetic process;GO:0009793//embryo development ending in seed dormancy	gi|685324922|ref|XP_009152025.1|/1.8752e-70/PREDICTED: B3 domain-containing transcription factor FUS3-like [Brassica rapa]
A6S29	BrScaffold000047_351	(CCG)6	p3	18	AAGCTTCCTCGTTCTCCTCC	59.957	CCTCATGGATTCCTCGTGAT	59.886	231	Bra025226	A06	21611469	21613220	Bra025226	K16190|1|4e-11|51.6|bdi:100843665|glucuronokinase [EC:2.7.1.43];K13422|3|1e-08|45.4|egu:105053846|transcription factor MYC2	GO:0043231//intracellular membrane-bounded organelle	GO:0003676//nucleic acid binding;GO:0001071//nucleic acid binding transcription factor activity	GO:0006355//regulation of transcription, DNA-templated;GO:0009409//response to cold;GO:0010374//stomatal complex development	gi|685324915|ref|XP_009152022.1|/0/PREDICTED: transcription factor ICE1-like [Brassica rapa]
A6s47	BrScaffold000047_322	(AAACC)4	p5	20	GTGGCTTCATCTTGGGTGAT	59.934	GAGGAGATGCTTGCTATGCC	59.946	267	Bra025212	A06	21661391	21663492	Bra025212	K14640|1|6e-165|464|brp:103875290|solute carrier family 20 (sodium-dependent phosphate transporter)	GO:0009526//plastid envelope	GO:0015291//secondary active transmembrane transporter activity	GO:0015698//inorganic anion transport	gi|685324970|ref|XP_009152045.1|/3.36625e-164/PREDICTED: inorganic phosphate transporter 2-1, chloroplastic [Brassica rapa]
A6s48	BrScaffold000047_316	(TAGTT)4	p5	20	GAGACTCGGCTTGTCACACA	60.03	TCAGGTCCATGGTGTTTTGA	59.935	278	Bra025211	A06	21665678	21669642	Bra025211	K12818|1|0.0|1547|brp:103875292|ATP-dependent RNA helicase DHX8/PRP22 [EC:3.6.4.13]	GO:0043231//intracellular membrane-bounded organelle;GO:0044444//cytoplasmic part	GO:0003724//RNA helicase activity;GO:0003676//nucleic acid binding;GO:0042623//ATPase activity, coupled;GO:0032559	-	gi|685324975|ref|XP_009152047.1|/0/PREDICTED: probable pre-mRNA-splicing factor ATP-dependent RNA helicase isoform X2 [Brassica rapa]
A6s49	BrScaffold000047_246	(AAC)6	p3	18	GTCATTGCAACACCAACCAG	60.008	GCTTATATCCTTCCTTGCCTGA	59.722	199	Bra025186	A06	21823881	21826340	Bra025186	-	GO:0044464	GO:0016798//hydrolase activity, acting on glycosyl bonds;GO:0043167//ion binding	GO:0044238//primary metabolic process	gi|685325041|ref|XP_009152076.1|/4.21817e-136/PREDICTED: uncharacterized protein LOC103875318 [Brassica rapa]
A6s50	BrScaffold000047_82	(AGG)7	p3	21	GGAGGAGAAGAGCCTGGTTT	59.817	GCTCCTCACTGGATCCCATA	60.034	278	Bra025148	A06	22134711	22135898	Bra025148	-	-	-	-	gi|685325191|ref|XP_009152130.1|/0/PREDICTED: uncharacterized protein LOC103875368 [Brassica rapa]
A6s51	BrScaffold000047_83	(CAT)4	p3	12	GGAGGAGAAGTGGTGGTGAA	60.088	GCTCCTCACTGGATCCCATA	60.034	212	Bra025148	A06	22134711	22135898	Bra025148	-	-	-	-	gi|685325191|ref|XP_009152130.1|/0/PREDICTED: uncharacterized protein LOC103875368 [Brassica rapa]
A6s18	BrScaffold000046_234	(CTT)9	p3	27	ATTATCATCACAGGGAGCCG	59.917	TGTTGGTCGAGCTGTTTCAG	60.025	243	Bra024846	A06	22729908	22730426	Bra024846	-	GO:0009534//chloroplast thylakoid	-	-	gi|685325629|ref|XP_009101301.1|/4.15265e-74/PREDICTED: uncharacterized protein LOC103827545 [Brassica rapa]
A6s52	BrScaffold000046_333	(TGC)4	p3	12	GGAACGGGTTATTGTGTTGG	60.088	ACGATCCTTTTGCAACATCC	59.939	246	Bra024871	A06	22922695	22926239	Bra024871	-	-	-	-	gi|8778222|gb|AAF79231.1|AC006917_16/4.75351e-101/F10B6.32 [Arabidopsis thaliana]
A6S30	BrScaffold000046_344	(TAA)7	p3	21	CTGTTCATTACAACCCCGCT	59.993	TAACCATCGAATCAGGGCTC	60.036	264	Bra024875	A06	22952357	22954078	Bra024875	K14494|1|0.0|1021|brp:103827572|DELLA protein	GO:0043231//intracellular membrane-bounded organelle	GO:0001071//nucleic acid binding transcription factor activity;GO:0005488	GO:0006351//transcription, DNA-templated;GO:0010162//seed dormancy process;GO:0009639//response to red or far red light;GO:0009740//gibberellic acid mediated signaling pathway;GO:0009894;GO:0006972//hyperosmotic response;GO:0019740//nitrogen utilization;GO:0010232//vascular transport;GO:0009845//seed germination	gi|75104298|sp|Q5BN23.1|RGA1_BRACM/0/RecName: Full=DELLA protein RGA1; AltName: Full=BrRGA1; AltName: Full=RGA-like protein 1 [Brassica rapa]
A6s54	BrScaffold000046_452	(AG)10	p2	20	TGAGCTTCCCTGGAGAAGAA	60.065	ATGAATCCCGTCTCTGGGTT	60.714	241	Bra024917	A06	23175442	23177525	Bra024917	K00787|1|5e-111|184|cam:101497550|farnesyl diphosphate synthase [EC:2.5.1.1 2.5.1.10]	-	GO:0016740//transferase activity	GO:0006694//steroid biosynthetic process	gi|291585672|gb|ADE18770.1|/1.51041e-111/farnesyl-diphosphate synthase [Glycyrrhiza uralensis]
A6s55	BrScaffold000046_571	(AAGA)6gataagtgtttcaataattaagtccagtactaatcaccctcacaaaatttaatgcaaacgtataggaagtcatactcacgcgtttttgctt(TCG)4	c	127	GCTTTCACAAAGGGAACGAG	59.853	CATCGGTGGAGTATGCAAAA	59.542	239	Bra024971	A06	23404535	23411791	Bra024971	-	-	-	-	gi|674955776|emb|CDX77728.1|/7.07964e-145/BnaC07g19820D [Brassica napus]
A6s56	BrScaffold000046_586	(TCA)8	p3	24	GTGAAGCCCATCGTCATCTT	60.081	CGAAGACTTTGGAGGAGCAG	60.126	239	Bra024979	A06	23436765	23438924	Bra024979	-	GO:0009536//plastid	GO:0003676//nucleic acid binding;GO:0034061//DNA polymerase activity	GO:0006260//DNA replication;GO:0006396//RNA processing	gi|685326073|ref|XP_009101465.1|/0/PREDICTED: uncharacterized mitochondrial protein ymf11 [Brassica rapa]
A6s57	BrScaffold000046_639	(ACC)4	p3	12	CATACCCACCGGAAGAAGAA	59.926	CGCTAGTGGAGGTGGAGAAG	60.005	125	Bra025001	A06	23552803	23553894	Bra025001	-	-	-	-	gi|685326152|ref|XP_009101496.1|/8.19385e-10/PREDICTED: glycine-rich cell wall structural protein 1.8 [Brassica rapa]
A6S31	BrScaffold000046_640	(ACC)6ggcatacccttcaactcctccatat(CCA)4	c	55	ACCAGTTGCTCCACCGTAAC	60.035	GAGGTGGTGAAGGCTATGGA	60.073	206	Bra025001	A06	23552803	23553894	Bra025001	-	-	-	-	gi|685326152|ref|XP_009101496.1|/8.19385e-10/PREDICTED: glycine-rich cell wall structural protein 1.8 [Brassica rapa]
A6s59	BrScaffold000046_749	(AAG)6	p3	18	CTCTCGCACTCATCAATCCA	59.942	GGTTCCTTTTCATGCTGCTC	59.82	219	Bra025043	A06	23789506	23790120	Bra025043	-	-	-	-	gi|674955673|emb|CDX77625.1|/1.11151e-23/BnaC07g18790D [Brassica napus]
A6s19	BrScaffold000046_800	(ACA)8	p3	24	TCGGTTCGGTTCTTCTTCTG	60.366	TGCTGATGGGTCTCTGAGTG	59.98	245	Bra025061	A06	23879891	23882727	Bra025061	K10756|1|2e-15|85.5|ota:Ot02g00770|replication factor C subunit 3/5;K10755|2|4e-15|84.7|cre:CHLREDRAFT_195837|replication factor C subunit 2/4	GO:0016020//membrane	GO:0003824//catalytic activity;GO:0000166//nucleotide binding	-	gi|685326348|ref|XP_009101575.1|/0/PREDICTED: LOW QUALITY PROTEIN: protein STICHEL-like 4 [Brassica rapa]
A6s60	BrScaffold000046_843	(GAA)6	p3	18	TGGAGGGAAGTACAAGACGG	60.103	CTGCAACCTTCTCCCATCTC	59.803	260	Bra025078	A06	23965766	23966665	Bra025078	K09522|1|3e-18|92.8|smo:SELMODRAFT_74197|DnaJ homolog subfamily C member 2	GO:0016020//membrane;GO:0043231//intracellular membrane-bounded organelle	GO:0003676//nucleic acid binding;GO:0001071//nucleic acid binding transcription factor activity	-	gi|685326406|ref|XP_009101599.1|/1.34611e-134/PREDICTED: dnaJ homolog subfamily C member 2-like [Brassica rapa]
A6S32	BrScaffold000089_572	(CTT)5	p3	15	TTGGTGTTGGTGTTGCATCT	60.008	GCAAGAGGAGCTGCAGTTTT	59.763	162	Bra033752	A06	24202349	24204129	Bra033752	K12191|1|2e-64|78.2|brp:103827890|charged multivesicular body protein 2A	GO:0010008//endosome membrane	-	GO:0006810//transport	gi|674883443|emb|CDY49021.1|/7.20082e-78/BnaAnng10150D [Brassica napus]
A6s61	BrScaffold000089_498	(ATG)4	p3	12	ATGCTTCGGTGGTTATGAGG	59.955	CCAGTTGCAGGAGAACATCA	59.831	264	Bra033725	A06	24344899	24351275	Bra033725	-	-	-	GO:0006351//transcription, DNA-templated	gi|685326715|ref|XP_009101732.1|/0/PREDICTED: uncharacterized protein LOC103827923 [Brassica rapa]
A6s62	BrScaffold000089_501	(AGG)4	p3	12	ACCTCGAAGTGCAGCAAACT	60.058	CGAGCTGCTAGCTTCTCCAT	59.882	253	Bra033725	A06	24344899	24351275	Bra033725	-	-	-	GO:0006351//transcription, DNA-templated	gi|685326715|ref|XP_009101732.1|/0/PREDICTED: uncharacterized protein LOC103827923 [Brassica rapa]
A6s63	BrScaffold000089_312	(CCT)6	p3	18	TATCTCCTCCATTCCATCGC	59.998	GCGAGGAGGTCATCGTAGAG	59.973	255	Bra033660	A06	24701635	24705005	Bra033660	K01381|1|2e-61|166|pper:PRUPE_ppa017424mg|saccharopepsin [EC:3.4.23.25];K00924|5|5e-21|77.4|ath:AT5G22850|	GO:0044464	GO:0008233//peptidase activity	GO:0019538//protein metabolic process	gi|685326910|ref|XP_009101813.1|/9.54048e-143/PREDICTED: aspartic proteinase-like protein 2 [Brassica rapa]
A6S33	BrScaffold000089_313	(AG)10	p2	20	GCGATGGTGCTTGGTAAAAT	59.967	AGTACGGACTGCAAACACCC	60.035	161	Bra033660	A06	24701635	24705005	Bra033660	K01381|1|2e-61|166|pper:PRUPE_ppa017424mg|saccharopepsin [EC:3.4.23.25];K00924|5|5e-21|77.4|ath:AT5G22850|	GO:0044464	GO:0008233//peptidase activity	GO:0019538//protein metabolic process	gi|685326910|ref|XP_009101813.1|/9.54048e-143/PREDICTED: aspartic proteinase-like protein 2 [Brassica rapa]
A6s20	BrScaffold000089_133	(TCT)55	p3	165	CTTCCTCACTTCCCCTCACA	60.229	CGAAATCCTTCTCTGCCATC	59.773	273	Bra033596	A06	25009920	25011118	Bra033596	K07574|1|2e-22|107|crb:CARUB_v10005383mg|RNA-binding protein	GO:0009536//plastid	-	-	gi|685327132|ref|XP_009101905.1|/7.11202e-34/PREDICTED: translation-associated element 2 [Brassica rapa]
A6S34	BrScaffold000089_52	(TG)11	p2	22	AACCTCGTGGATGCTGTTTC	60.119	CCTTAGATTCCACATCCCCA	59.744	201	Bra033564	A06	25145883	25150608	Bra033564	K00423|1|7e-119|348|tcc:TCM_039977|L-ascorbate oxidase [EC:1.10.3.3]	GO:0005618//cell wall	GO:0003824//catalytic activity	-	gi|674877253|emb|CDY54804.1|/0/BnaA06g40970D [Brassica napus]
A6S35	BrScaffold000089_18	(GCT)9	p3	27	CAGACACTGCAGGCAGAGAA	60.333	TCGCTCATGTCTTCTCCAAA	59.522	249	Bra033559	A06	25176578	25177730	Bra033559	-	-	-	-	gi|674877248|emb|CDY54798.1|/4.9168e-135/BnaA06g40920D [Brassica napus]
A7S46	BrScaffold000117_265	(GA)10	p2	20	ACCTCCCCGCTCTCAATAAT	59.925	GTTCAGCTTTGGGTTTTGGA	60.088	201	Bra036497	A07	63696	64578	Bra036497	K07052|1|2e-77|203|brp:103828148|uncharacterized protein	GO:0009536//plastid	GO:0016787//hydrolase activity	GO:0019538//protein metabolic process	gi|685327343|ref|XP_009101996.1|/1.158e-76/PREDICTED: uncharacterized protein LOC103828148 isoform X1 [Brassica rapa]
A7S1	BrScaffold000117_142	(GA)14	p2	28	GGCTTCAGTAATCCCTTCCC	59.903	ACTCTCTGCATCCAGGTGCT	60.017	190	Bra036460	A07	266990	275096	Bra036460	K10357|1|0.0|207|pop:POPTR_0001s23960g|myosin V	GO:0015629//actin cytoskeleton	GO:0005488	GO:0030029//actin filament-based process	gi|674930056|emb|CDY03315.1|/0/BnaC09g10330D [Brassica napus]
A7S26	BrScaffold000158_105	(GT)6	p2	12	CTAGGCTGGTTAATGGCTGC	59.867	AGAGGCATGACAACGGAAAC	60.119	240	Bra039028	A07	492345	495414	Bra039028	-	-	-	-	gi|685327677|ref|XP_009102130.1|/3.50908e-141/PREDICTED: uncharacterized protein LOC103828270 [Brassica rapa]
A7S27	BrScaffold000181_29	(AG)12	p2	24	ATCGAAGAAGCGAACCAGAA	59.955	CTTCTGCTGTCTGATGAGCG	59.88	278	Bra039896	A07	1767130	1767760	Bra039896	-	-	-	-	gi|674928324|emb|CDY04819.1|/1.2237e-62/BnaAnng00010D [Brassica napus]
2s13	BrScaffold000002_532	(AG)16g(GA)12	c	57	GACCAGCTGCAAATGAGGTT	60.263	CGCGAGTTCGATGTGAGTAA	60.011	198	Bra002094	A07	1904544	1910264	Bra002094	K05658|1|0.0|514|brp:103845914|ATP-binding cassette, subfamily B (MDR/TAP), member 1 [EC:3.6.3.44]	-	GO:0017111//nucleoside-triphosphatase activity;GO:0000166//nucleotide binding	GO:0009987//cellular process;GO:0006810//transport	gi|685376233|ref|XP_009121075.1|/0/PREDICTED: ABC transporter B family member 5-like [Brassica rapa]
A7S28	BrScaffold000002_467	(AG)6	p2	12	TGTCATCACCCCTGATTCAA	59.893	ACTGCAAATCTGCTCATGGA	59.399	187	Bra002078	A07	2019578	2022739	Bra002078	K17535|1|9e-50|83.6|bvg:104895619|serine/threonine-protein kinase TNNI3K [EC:2.7.11.1]	GO:0044444//cytoplasmic part	GO:0004672//protein kinase activity	-	gi|685376273|ref|XP_009121093.1|/2.44681e-105/PREDICTED: tyrosine-protein kinase FRK-like [Brassica rapa]
A7S47	BrScaffold000002_202	(TCA)6	p3	18	GGACCTCATCGATGCTGATT	60.042	GTATGAGCACAACGGCAAGA	59.871	262	Bra002003	A07	2687218	2692252	Bra002003	K08900|1|5e-15|85.1|jcu:105629312|mitochondrial chaperone BCS1	GO:0016020//membrane	-	GO:0009628//response to abiotic stimulus	gi|685376529|ref|XP_009121196.1|/3.50638e-167/PREDICTED: LOW QUALITY PROTEIN: uncharacterized protein LOC103846020 [Brassica rapa]
A7S2	BrScaffold000002_115	(AG)8	p2	16	GCAACGTATCCTTTGCCATT	59.967	AACAGCCGAATCAGATCCAC	60.081	187	Bra001977	A07	2895538	2898092	Bra001977	K14963|1|4e-06|54.7|ppp:PHYPADRAFT_88111|COMPASS component SWD3	-	-	-	gi|685340448|ref|XP_009107026.1|/1.03005e-80/PREDICTED: uncharacterized protein LOC103832714 [Brassica rapa]
A7S29	BrScaffold000002_4	(TGT)7	p3	21	TGGTAAATGGATTGCGATTG	59.377	CAATGAGTAGGATCGCAGCA	59.972	192	Bra001953	A07	3168349	3169205	Bra001953	-	GO:0043231//intracellular membrane-bounded organelle;GO:0016020//membrane	-	GO:0009414//response to water deprivation;GO:0009725//response to hormone;GO:0009409//response to cold	gi|674882853|emb|CDY49552.1|/4.0149e-70/BnaA07g03740D [Brassica napus]
A7S48	BrScaffold000116_83	(TCT)8	p3	24	CAGGTGCTAAGCCAATGACA	59.864	CAGATACCTCAAAGCACGCA	60.011	202	Bra036396	A07	4475919	4478150	Bra036396	K13420|1|4e-86|320|bvg:104883663|LRR receptor-like serine/threonine-protein kinase FLS2 [EC:2.7.11.1]	GO:0044464	-	-	gi|685328182|ref|XP_009102319.1|/0/PREDICTED: receptor-like protein 12 isoform X1 [Brassica rapa]
A7S30	BrScaffold000017_952	(CTC)7	p3	21	AGAACCAATTGAGACCACCG	59.966	TGTTTTCTTTTGGGGGACAG	59.942	274	Bra015089	A07	5792652	5797967	Bra015089	-	-	-	GO:0051234//establishment of localization	gi|685328551|ref|XP_009102454.1|/0/PREDICTED: phosphatidylinositol/phosphatidylcholine transfer protein SFH9 isoform X1 [Brassica rapa]
A7S49	BrScaffold000017_763	(CTT)5	p3	15	CTCCTGTCGCAAACACAAAA	59.881	TCGCAATGTTTCCAATTCAA	60.051	118	Bra015042	A07	6234575	6236868	Bra015042	-	GO:0044464	-	GO:0003006//developmental process involved in reproduction	gi|674955942|emb|CDX77425.1|/2.77438e-80/BnaA07g05630D [Brassica napus]
A7S50	BrScaffold000069_470	(CT)8	p2	16	GGCAACATGCATTGGTTTTT	60.742	AGTGTAACGACCCGATCCTG	59.989	212	Bra030169	A07	8205009	8211417	Bra030169	K04733|1|7e-106|124|pop:POPTR_0011s06100g|interleukin-1 receptor-associated kinase 4 [EC:2.7.11.1]	GO:0044464	GO:0004672//protein kinase activity;GO:0032559	GO:0006464//cellular protein modification process	gi|674889500|emb|CDY43185.1|/0/BnaA07g07690D [Brassica napus]
A7S6	BrScaffold000012_1852	(CT)13	p2	26	ACCAGCCAACACAAGTCTCC	60.159	TTTGTCGGATTTGCATGTTC	59.523	205	Bra012472	A07	9592620	9594816	Bra012472	-	-	-	-	gi|685330134|ref|XP_009103074.1|/3.53214e-18/PREDICTED: GDT1-like protein 4 isoform X2 [Brassica rapa]
A7S52	BrScaffold000012_1772	(AG)9	p2	18	CCAAATCAAGCGAAAACCAT	59.938	CTCTGTTCATCTCCCGTGGT	60.112	190	Bra012447	A07	9764225	9770230	Bra012447	K15151|1|2e-78|152|brp:103829197|mediator of RNA polymerase II transcription subunit 10	GO:0043234//protein complex	GO:0005515//protein binding	GO:0044267//cellular protein metabolic process;GO:0006355//regulation of transcription, DNA-templated	gi|674892502|emb|CDY40258.1|/3.04898e-78/BnaA07g09420D [Brassica napus]
A7S33	BrScaffold000012_1235	(TC)7	p2	14	TCATCATCGTCGTCATGGTT	59.925	GGCTTCCTTCGTTTTCTTCC	60.187	237	Bra012279	A07	11083966	11086012	Bra012279	-	-	-	-	gi|685330747|ref|XP_009103295.1|/2.64272e-142/PREDICTED: TOM1-like protein 2 [Brassica rapa]
A7S53	BrScaffold000012_1159	(AATA)6	p4	24	TAGCTTTGCGGCTTTTCTTC	59.742	GACGATGACAACGTTGATGG	59.967	229	Bra012259	A07	11256922	11257844	Bra012259	K03626|1|2e-57|166|brp:103829400|nascent polypeptide-associated complex subunit alpha	-	-	-	gi|685330803|ref|XP_009103315.1|/1.09432e-56/PREDICTED: nascent polypeptide-associated complex subunit alpha-like protein 4 [Brassica rapa]
A7S54	BrScaffold000012_806	(CTG)5	p3	15	GCCTGAGCTCCGTATTTTTG	59.845	AATTACATCGAATCCACCGC	59.791	267	Bra012144	A07	12006213	12007892	Bra012144	K05542|1|6e-143|508|brp:103829527|tRNA-dihydrouridine synthase 1 [EC:1.3.1.88]	GO:0043231//intracellular membrane-bounded organelle	GO:0016627//oxidoreductase activity, acting on the CH-CH group of donors;GO:0050662//coenzyme binding	GO:0006399//tRNA metabolic process;GO:0019740//nitrogen utilization	gi|685331169|ref|XP_009103443.1|/3.24108e-142/PREDICTED: tRNA-dihydrouridine(16/17) synthase [NAD(P)(+)]-like [Brassica rapa]
A7S35	BrScaffold000012_622	(TCA)7	p3	21	GCCTTTCCCAATTTGTCTGA	60.051	GGCTTCGACTCCAAAAACAA	60.227	274	Bra012079	A07	12376151	12381350	Bra012079	K01792|1|8e-124|117|eus:EUTSA_v10004652mg|glucose-6-phosphate 1-epimerase [EC:5.1.3.15]	GO:0009532//plastid stroma;GO:0005576//extracellular region	GO:0005488;GO:0016857//racemase and epimerase activity, acting on carbohydrates and derivatives	GO:0019318//hexose metabolic process	gi|567136050|ref|XP_006393846.1|/4.61345e-123/hypothetical protein EUTSA_v10004652mg [Eutrema salsugineum]
A7S8	BrScaffold000012_562	(TGG)4tagatggcttattctctgtaggtttcttgcatcctttatgagcc(TTG)5	c	71	GGAAGTCTTTGGCGTATCCA	60.074	CTCCCTCAACTCCAAATCCA	60.042	264	Bra012058	A07	12482960	12485710	Bra012058	K13412|1|6e-157|226|brp:103829620|calcium-dependent protein kinase [EC:2.7.11.1]	GO:0016020//membrane	GO:0004674//protein serine/threonine kinase activity;GO:0000166//nucleotide binding	GO:0006464//cellular protein modification process	gi|685331425|ref|XP_009103544.1|/3.44744e-156/PREDICTED: calcium-dependent protein kinase 28 isoform X1 [Brassica rapa]
A7S36	BrScaffold000012_418	(ATC)9	p3	27	AGGGGAATGCAGAGAAGGTT	60.074	CACTGGTGGTGGTTCTGTTG	60.039	271	Bra012023	A07	12786250	12788593	Bra012023	K12655|1|6e-56|219|brp:103829662|OTU domain-containing protein 5 [EC:3.4.19.12]	-	-	-	gi|685331542|ref|XP_009103593.1|/3.46443e-55/PREDICTED: OTU domain-containing protein 5-like isoform X1 [Brassica rapa]
A7S9	BrScaffold000012_419	(AGA)6tgatgaaggtttggttgtttcggagaacgc(TGT)4	c	60	CACTCCCCAGTGATGAACCT	59.962	TCACCAAAACTCCCCAAGAC	59.943	217	Bra012023	A07	12786250	12788593	Bra012023	K12655|1|6e-56|219|brp:103829662|OTU domain-containing protein 5 [EC:3.4.19.12]	-	-	-	gi|685331542|ref|XP_009103593.1|/3.46443e-55/PREDICTED: OTU domain-containing protein 5-like isoform X1 [Brassica rapa]
A7S37	BrScaffold000012_403	(GAG)6	p3	18	TGGGAAAAAGGCTGCTAGTG	60.378	TGTTTTCCTCATTCCCGTTC	59.91	239	Bra012016	A07	12820765	12821768	Bra012016	K02326|1|4e-24|112|brp:103829668|DNA polymerase epsilon subunit 3 [EC:2.7.7.7]	GO:0043231//intracellular membrane-bounded organelle	GO:0003677//DNA binding;GO:0001071//nucleic acid binding transcription factor activity	GO:0006351//transcription, DNA-templated	gi|685331558|ref|XP_009103599.1|/1.9521e-23/PREDICTED: DNA polymerase epsilon subunit 3 [Brassica rapa]
A7S38	BrScaffold000012_354	(AG)6	p2	12	ACCTGAAAACGAGCTCCAGA	59.989	TCTTACCGGAATCTGAACCG	60.066	139	Bra011994	A07	12919097	12919758	Bra011994	-	-	-	-	gi|18401542|ref|NP_565660.1|/2.81088e-75/uncharacterized protein [Arabidopsis thaliana]
A7S55	BrScaffold000012_126	(GGA)7	p3	21	GTTTGGGGAGAGCTGATGAC	59.661	AATATCTTCAGGGGCAACCC	60.152	261	Bra011935	A07	13405727	13406047	Bra011935	K07195|1|3e-38|157|brp:103829756|exocyst complex component 7	GO:0043234//protein complex	-	GO:0006887//exocytosis	gi|685331817|ref|XP_009103703.1|/1.65515e-37/PREDICTED: exocyst complex component EXO70A1 [Brassica rapa]
A7S39	BrScaffold000012_30	(GA)11	p2	22	GGAGAATTGTAACGACCCGA	59.933	GGCAACATGCATTGGTTTTT	60.742	222	Bra011913	A07	13596381	13612956	Bra011913	K13415|1|4e-10|70.9|mdm:103401427|protein brassinosteroid insensitive 1 [EC:2.7.10.1 2.7.11.1];K10395|2|5e-07|42.4|pmum:103342269|kinesin family member 4/21/27;K13356|4|6e-07|45.8|pda:103696395|alcohol-forming fatty acyl-CoA reductase [EC:1.2.1.84]	-	-	-	gi|685331898|ref|XP_009103728.1|/1.29619e-95/PREDICTED: uncharacterized protein LOC103829785 isoform X1 [Brassica rapa]
A7S56	BrScaffold000062_119	(GA)9taa(AG)8	c	37	CATTTGGTAAGCCGCAAAAT	59.964	AGACCGGAAACATCATCGAC	59.934	243	Bra028433	A07	13969000	13972749	Bra028433	-	-	-	-	gi|674965188|emb|CDX67431.1|/1.55337e-39/BnaA07g14710D [Brassica napus]
A7S11	BrScaffold000062_428	(AAC)5aaggctacttccg(ACA)5	c	43	AAACGTTTTGGCAGTTCAGC	60.292	GTTGACGTTGTTGGATGTCG	60.008	278	Bra028523	A07	14546700	14547798	Bra028523	K10457|1|7e-19|95.5|vvi:100267149|kelch-like protein 20;K10442|2|2e-18|94.0|sly:101268156|kelch-like protein 1/4/5;K16726|3|4e-06|53.1|mis:MICPUN_106342|ankyrin repeat domain-containing protein 17	-	-	-	gi|685268279|ref|XP_009125216.1|/1.22285e-154/PREDICTED: B2 protein [Brassica rapa]
A7S12	BrScaffold000003_115	(GGA)7	p3	21	CAACGTCACGGTTGGTGTAT	59.339	ACCATGAACTCGTCCTCGTC	60.12	234	Bra003169	A07	14951119	14952141	Bra003169	-	-	-	-	gi|674965344|emb|CDX67587.1|/8.9809e-141/BnaA07g16270D [Brassica napus]
A7S41	BrScaffold000003_427	(CTT)5	p3	15	TTCTCTGACTTTGGTGTCGC	59.01	ATGGAGAAGTGAGCAAGCGT	60.02	199	Bra003270	A07	15580328	15581971	Bra003270	K11131|1|0.0|807|brp:103830088|H/ACA ribonucleoprotein complex subunit 4 [EC:5.4.99.-]	-	GO:0003676//nucleic acid binding;GO:0016866//intramolecular transferase activity	GO:0010467//gene expression;GO:0009451//RNA modification	gi|685332697|ref|XP_009104046.1|/0/PREDICTED: H/ACA ribonucleoprotein complex subunit 4 [Brassica rapa]
A7S58	BrScaffold000003_694	(AC)7(AT)8	c	30	GGAGGTCTGGATTTTGCCTT	60.443	TCAGCAAGGGTACAATGTGAA	59.184	277	Bra003364	A07	16114527	16128249	Bra003364	K11000|1|0.0|233|aly:ARALYDRAFT_907409|callose synthase [EC:2.4.1.-]	GO:0043234//protein complex;GO:0044464	GO:0035251//UDP-glucosyltransferase activity	GO:0006074//(1->3)-beta-D-glucan metabolic process	gi|674935069|emb|CDX98348.1|/0/BnaC06g17090D [Brassica napus]
A7S42	BrScaffold000003_768	(TA)6	p2	12	CGGAGAAATGTGGATATGGG	60.148	TGCTTCAGCTTCCTAAGCCT	59.359	216	Bra003396	A07	16285400	16287755	Bra003396	K11423|1|5e-55|169|brp:103830237|histone-lysine N-methyltransferase SETD2 [EC:2.1.1.43]	GO:0043231//intracellular membrane-bounded organelle	GO:0016279//protein-lysine N-methyltransferase activity	GO:0006479//protein methylation	gi|685333155|ref|XP_009104232.1|/2.6623e-54/PREDICTED: putative histone-lysine N-methyltransferase ASHH4 isoform X1 [Brassica rapa]
A7S59	BrScaffold000003_892	(T)13cgatttcttttctttc(T)28	c	57	AACAACTTTGCTAGCCCCCT	60.13	GGGAGGGTGAGTGTTGTGAT	59.817	229	Bra003447	A07	16511986	16522028	Bra003447	K03453|1|1e-37|161|mdm:103408058|bile acid:Na+ symporter, BASS family;K12819|2|1e-35|154|mdm:103427975|pre-mRNA-processing factor SLU7;K01303|4|5e-30|135|fve:101311565|acylaminoacyl-peptidase [EC:3.4.19.1];K10706|5|3e-28|130|mdm:103410900|senataxin [EC:3.6.4.-]	-	-	-	gi|685266492|ref|XP_009120064.1|/0/PREDICTED: uncharacterized protein LOC103844987 [Brassica rapa]
A7S43	BrScaffold000003_1280	(TCC)7	p3	21	TGAAAGAAACCTCCCACACC	59.943	TCGTACGGGACAATGGGTAT	60.074	279	Bra003595	A07	17248902	17251049	Bra003595	K13510|1|2e-86|320|brp:103830467|lysophosphatidylcholine acyltransferase / lyso-PAF acetyltransferase [EC:2.3.1.23 2.3.1.67]	GO:0043231//intracellular membrane-bounded organelle	GO:0016747//transferase activity, transferring acyl groups other than amino-acyl groups	-	gi|685333832|ref|XP_009104504.1|/1.29632e-85/PREDICTED: lysophospholipid acyltransferase LPEAT1 isoform X2 [Brassica rapa]
A7S61	BrScaffold000003_1496	(AT)7	p2	14	CTATCACGCGGGATGAGTCT	60.24	AACAGAGCGCAGGTAATTTCA	59.897	274	Bra003672	A07	17663372	17664300	Bra003672	K12162|1|6e-19|66.6|brp:103830553|ubiquitin-fold modifier 1	-	-	-	gi|674251536|gb|KFK44301.1|/2.01179e-18/hypothetical protein AALP_AA1G240100 [Arabis alpina]
A7S62	BrScaffold000003_1589	(TGT)6	p3	18	ACACCGGGCTCATACTGTTC	59.997	ATCTCCAATCACCGAAGCAC	60.081	220	Bra003698	A07	17836756	17840925	Bra003698	K10615|1|2e-37|159|atr:18446390|E3 ubiquitin-protein ligase HERC4 [EC:2.3.2.26]	-	GO:0017016//Ras GTPase binding;GO:0046914//transition metal ion binding	-	gi|685334174|ref|XP_009104646.1|/0/PREDICTED: uncharacterized protein LOC103830587 [Brassica rapa]
A7S15	BrScaffold000003_1611	(AT)15	p2	30	CAAGCTCAGCCATTTTCCTG	60.904	TCATGAGACTGAGAAGGCGA	59.656	253	Bra003703	A07	17874992	17877323	Bra003703	-	-	-	GO:0006351//transcription, DNA-templated	gi|685334195|ref|XP_009104654.1|/1.07464e-157/PREDICTED: trihelix transcription factor GT-2 [Brassica rapa]
A7S63	BrScaffold000003_1660	(TA)11	p2	22	TTGGCTGACTTTGCTTCGTA	59.609	AGTTCTCAAGTTTGCGGACAA	59.906	230	Bra003719	A07	17963258	17973321	Bra003719	K08176|1|2e-169|599|brp:103830612|MFS transporter, PHS family, inorganic phosphate transporter	GO:0031224//intrinsic component of membrane	GO:0015103//inorganic anion transmembrane transporter activity	GO:0006810//transport	gi|685334241|ref|XP_009104675.1|/9.97124e-169/PREDICTED: probable inorganic phosphate transporter 1-9 [Brassica rapa]
A7S44	BrScaffold000003_1886	(TGT)7	p3	21	CGGGAGTGATCGATGAAGAT	60.034	CTCAGAGGACGGACAACGAT	60.261	267	Bra003793	A07	18369902	18371270	Bra003793	K09422|1|1e-106|387|brp:103830692|myb proto-oncogene protein, plant	-	GO:0001071//nucleic acid binding transcription factor activity	GO:0009725//response to hormone;GO:0006351//transcription, DNA-templated;GO:0009743//response to carbohydrate	gi|685334464|ref|XP_009104754.1|/6.38192e-106/PREDICTED: myb-related protein 306-like [Brassica rapa]
A7S16	BrScaffold000003_2150	(AT)8	p2	16	TACGCGTTTTCTGTTTTCCC	60.11	CCCTGGTTTATTAGCCAAAATTC	60.083	231	Bra003903	A07	18926501	18933151	Bra003903	K05681|1|1e-51|207|cme:CYME_CMS467C|ATP-binding cassette, subfamily G (WHITE), member 2	GO:0016020//membrane	GO:0017111//nucleoside-triphosphatase activity;GO:0015405;GO:0032559	GO:0009725//response to hormone;GO:0009207;GO:0046865//terpenoid transport	gi|685334822|ref|XP_009104883.1|/2.81296e-168/PREDICTED: ABC transporter G family member 25-like [Brassica rapa]
A7S64	BrScaffold000003_2221	(CT)10	p2	20	GCTGTTGCTTTCGGATCTTC	59.962	TGTGCTCATCAATCCTCTCG	59.942	222	Bra003934	A07	19106861	19110289	Bra003934	K15397|1|0.0|906|brp:103830864|3-ketoacyl-CoA synthase [EC:2.3.1.199]	GO:0044464	GO:0016747//transferase activity, transferring acyl groups other than amino-acyl groups	GO:0007275//multicellular organism development;GO:0006631//fatty acid metabolic process	gi|685334934|ref|XP_009104926.1|/0/PREDICTED: 3-ketoacyl-CoA synthase 7-like [Brassica rapa]
A7S45	BrScaffold000003_2707	(AT)14	p2	28	TTGTCTCCGGCAATGAAAAT	60.448	GCATGGGTAACTGAAGTCCC	59.41	260	Bra004085	A07	20031211	20036908	Bra004085	K01228|1|1e-128|315|brp:103831024|mannosyl-oligosaccharide glucosidase [EC:3.2.1.106]	GO:0043231//intracellular membrane-bounded organelle	GO:0015926//glucosidase activity	GO:0009913//epidermal cell differentiation	gi|685335434|ref|XP_009105115.1|/7.11629e-128/PREDICTED: mannosyl-oligosaccharide glucosidase GCS1 [Brassica rapa]
A7S17	BrScaffold000003_2930	(CTT)6caccag(CTT)4caccag(CTT)11	c	75	GAGTTGACCTGCGAACATTG	59.293	CTTGGAAACTCCTCAGAGCG	60.126	248	Bra004174	A07	20491331	20492506	Bra004174	K04506|1|1e-167|589|brp:103831113|E3 ubiquitin-protein ligase SIAH1 [EC:2.3.2.27]	-	-	-	gi|685335669|ref|XP_009105214.1|/6.88976e-167/PREDICTED: E3 ubiquitin-protein ligase SINA-like 2 [Brassica rapa]
A7S65	BrScaffold000003_3314	(TA)12	p2	24	AACATGTCGTTTTGTCGCTG	59.764	GATCATATCGGATGGGGTTG	59.975	258	Bra004324	A07	21272695	21274809	Bra004324	K17573|1|4e-17|76.3|rcu:RCOM_1436620|meiosis arrest female protein 1	-	-	-	gi|674937350|emb|CDX96002.1|/0/BnaA07g27290D [Brassica napus]
A7S19	BrScaffold000003_3562	(AGGAGA)3(AGA)7*	c*	36	GTACGGCGGAGCTGATAAAA	60.23	CTCTAGCGAGTTGACCTGGG	60.005	258	Bra004402	A07	21747417	21750008	Bra004402	K04506|1|3e-142|506|brp:103831366|E3 ubiquitin-protein ligase SIAH1 [EC:2.3.2.27]	GO:0043231//intracellular membrane-bounded organelle	-	GO:0019941//modification-dependent protein catabolic process;GO:0032501//multicellular organismal process	gi|685336444|ref|XP_009105517.1|/1.5935e-141/PREDICTED: E3 ubiquitin-protein ligase SINA-like 2 isoform X1 [Brassica rapa]
A7S20	BrScaffold000019_1243	(AG)10	p2	20	TCAATCTTGTTCACATGCCC	59.502	TGGGGAATCATCTCGGTTAG	59.887	130	Bra016126	A07	22584397	22585967	Bra016126	K14156|1|3e-169|414|brp:103831678|choline/ethanolamine kinase [EC:2.7.1.32 2.7.1.82]	GO:0005911//cell-cell junction	GO:0016773//phosphotransferase activity, alcohol group as acceptor;GO:0016301//kinase activity	GO:0006950//response to stress;GO:0044237//cellular metabolic process	gi|674936917|emb|CDX96336.1|/1.4554e-168/BnaA07g29470D [Brassica napus]
2s14	BrScaffold000019_649	(CT)14	p2	28	AAGGCAACTCGTCTGAGCTT	59.236	CTGAATGTAGCAGACAGGAGGA	59.496	269	Bra015862	A07	23740784	23742399	Bra015862	-	-	-	-	gi|674887225|emb|CDY45414.1|/2.62415e-133/BnaA07g31940D [Brassica napus]
A7S23	BrScaffold000019_441	(AGA)7	p3	21	GACGAGCAATGACAACGAGA	59.992	CGTTCGTTACAGTTCCAGCA	59.904	154	Bra015783	A07	24159976	24163502	Bra015783	K01322|1|0.0|374|brp:103832063|prolyl oligopeptidase [EC:3.4.21.26]	GO:0009536//plastid	GO:0004175//endopeptidase activity	GO:0019538//protein metabolic process	gi|685338483|ref|XP_009106269.1|/0/PREDICTED: prolyl endopeptidase [Brassica rapa]
A7S24	BrScaffold000019_185	(GAA)7cactaaaacgactattttcgaaccaaaaccaaacaaagaagacgaatcactcatt(GAA)4(GAAGAG)3*	c*	103	CTTAACGACGCCGTTTCTTC	59.883	ACGCACCGTCTAGAACATCT	57.414	188	Bra015692	A07	24615310	24616754	Bra015692	-	-	-	-	gi|685338756|ref|XP_009106375.1|/1.49435e-76/PREDICTED: LOW QUALITY PROTEIN: uncharacterized protein LOC103832165 [Brassica rapa]
A7S25	BrScaffold000101_298	(TC)11	p2	22	AGCTGGAGGAAGAGCTAGGC	60.255	AATGGGATTGGATGCAGAAT	59.204	280	Bra035136	A07	25610346	25614921	Bra035136	-	GO:0044444//cytoplasmic part;GO:0043231//intracellular membrane-bounded organelle	GO:0005488	-	gi|590616549|ref|XP_007023537.1|/1.14694e-94/Nudix hydrolase isoform 1 [Theobroma cacao]
A8S41	BrScaffold000073_32	(TTG)9	p3	27	TCCGAAAAAGAAGAAAGCGA	60.067	AAGGCTTCACGTCCATGTTC	60.119	146	Bra030815	A08	57170	62428	Bra030815	K04733|1|6e-80|123|mdm:103421866|interleukin-1 receptor-associated kinase 4 [EC:2.7.11.1]	GO:0016020//membrane	GO:0004672//protein kinase activity	-	gi|685339881|ref|XP_009106800.1|/0/PREDICTED: probable LRR receptor-like serine/threonine-protein kinase At1g56140 [Brassica rapa]
A8S21	BrScaffold000073_62	(GAA)5	p3	15	ATCGTCGTCATGGTCTCCTC	60.08	ACACCCACAATCCCACTCTC	59.817	125	Bra030826	A08	113272	114329	Bra030826	K14709|1|6e-141|297|eus:EUTSA_v10011655mg|solute carrier family 39 (zinc transporter), member 1/2/3	GO:0044464	GO:0008324//cation transmembrane transporter activity	GO:0006812//cation transport	gi|8778308|gb|AAF79317.1|AC002304_10/1.67464e-142/F14J16.16 [Arabidopsis thaliana]
A8S2	BrScaffold000073_353	(CAA)4gcaatgatgcagcaagcgatgatgcaacagcagcatcactctctctatcatcctagtcttatgg(CTC)6aggtttgtcaatcggctttgattctaaattagggtttgttctgaaaatcccgattcgtgggtagctttgaa(TC)8	c	181	AAAGGATGCAGAACCAGAGG	59.284	ACACGAAACCCTAACCCACA	60.269	256	Bra030908	A08	699505	701931	Bra030908	K13201|1|5e-95|151|brp:103832637|nucleolysin TIA-1/TIAR	-	-	-	gi|685340248|ref|XP_009106944.1|/2.62943e-94/PREDICTED: oligouridylate-binding protein 1A-like [Brassica rapa]
2s15	BrScaffold000073_618	(TC)16(TA)12(GA)11	c	78	AAGGCGTGCTTCATCGTTAC	60.278	GCGCAGATTTCTCTCCAAAC	59.962	251	Bra030973	A08	1255137	1257352	Bra030973	K06130|1|3e-55|121|brp:103832709|lysophospholipase II [EC:3.1.1.5]	-	-	-	gi|674848945|emb|CDY72010.1|/6.96698e-56/BnaC03g78050D [Brassica napus]
A8S42	BrScaffold000015_1457	(GGT)5gggagactctcagctgagtcaggaggagaat(GCTCAG)5	c	76	ACTCATCCATCTTCAACCGC	60.081	TTCCGAGACCGAGTCTGAGT	59.986	140	Bra014370	A08	1369188	1370195	Bra014370	K09903|1|1e-09|64.7|pvu:PHAVU_007G105700g|uridylate kinase [EC:2.7.4.22]	GO:0031981//nuclear lumen	GO:0003677//DNA binding	GO:0048316//seed development;GO:0009725//response to hormone;GO:0009845//seed germination;GO:2000026//regulation of multicellular organismal development	gi|685340519|ref|XP_009107062.1|/9.71564e-132/PREDICTED: trihelix transcription factor GTL1-like [Brassica rapa]
A8S22	BrScaffold000015_1361	(AGA)9	p3	27	GCTCTGTCTTTCTGATCGGC	60.104	CGAGGAGGGAAGCTCTTTCT	60.088	278	Bra014330	A08	1583063	1585667	Bra014330	K10758|1|1e-125|247|aly:ARALYDRAFT_471691|thiol oxidase [EC:1.8.3.2]	GO:0030312//external encapsulating structure	GO:0046914//transition metal ion binding;GO:0016670//oxidoreductase activity, acting on a sulfur group of donors, oxygen as acceptor	GO:0006813//potassium ion transport;GO:0008152//metabolic process;GO:0019725//cellular homeostasis;GO:0009651//response to salt stress	gi|297849928|ref|XP_002892845.1|/6.95402e-125/quiescin-sulfhydryl oxidase 1 [Arabidopsis lyrata subsp. lyrata]
A8S3	BrScaffold000015_1217	(TG)13	p2	26	GATGAGTCAGGGAGGGATGA	60.008	AATCATCAACAGCGCCTTCT	59.843	256	Bra014290	A08	1890584	1892883	Bra014290	K13162|1|0.0|595|brp:103832837|poly(rC)-binding protein 2/3/4	-	GO:0003676//nucleic acid binding	-	gi|685340810|ref|XP_009107177.1|/0/PREDICTED: poly(rC)-binding protein 3 [Brassica rapa]
A8S23	BrScaffold000015_1088	(TA)9	p2	18	TTTTGACAGCTACCAACATTTCA	59.677	AGGTTGCTAGGGCTAAAGGC	59.877	265	Bra014247	A08	2222043	2224382	Bra014247	K01931|1|7e-14|80.1|ppp:PHYPADRAFT_182911|protein neuralized [EC:2.3.2.27];K15688|2|3e-07|58.2|smo:SELMODRAFT_234706|E3 ubiquitin-protein ligase MUL1 [EC:2.3.2.27]	-	-	-	gi|685340931|ref|XP_009107223.1|/3.20024e-93/PREDICTED: putative E3 ubiquitin-protein ligase XBAT34 isoform X1 [Brassica rapa]
A8S4	BrScaffold000015_842	(ACA)8agtgatcaagcatagaccag(CTCAGC)4	c	68	TGAACCGAGATCGAAGAAGG	60.331	CATCACAGGTGTTCCCACAG	59.997	251	Bra014169	A08	2842504	2843512	Bra014169	K08869|1|6e-20|84.3|cre:CHLREDRAFT_165812|aarF domain-containing kinase	-	GO:0001071//nucleic acid binding transcription factor activity	GO:0009725//response to hormone;GO:0006970//response to osmotic stress;GO:0010038//response to metal ion	gi|685341172|ref|XP_009107320.1|/2.32089e-132/PREDICTED: transcription factor DIVARICATA-like [Brassica rapa]
A8S24	BrScaffold000015_180	(CT)6	p2	12	AAATCAACAAGCCGGTTCAC	59.978	TTTGACCAATCTGCATGGAA	60.049	250	Bra014018	A08	4528256	4538226	Bra014018	-	-	-	-	gi|89257600|gb|ABD65089.1|/1.21338e-33/zinc knuckle containing protein [Brassica oleracea]
A8S44	BrScaffold000099_8	(AG)6	p2	12	CAAGGAGTAGGAGACGCTGG	60.005	CTAAACCCTCTGCTTCCGTG	59.869	182	Bra034873	A08	5880561	5882556	Bra034873	-	GO:0009526//plastid envelope	-	-	gi|685342264|ref|XP_009107704.1|/2.89985e-103/PREDICTED: GDT1-like protein 2, chloroplastic [Brassica rapa]
A8S5	BrScaffold000179_69	(TCT)11	p3	33	CAAAGATCGGCGAAGAAGAC	59.955	TGGGAATTGCAACATGAAGA	60.049	160	Bra039871	A08	6174038	6176574	Bra039871	K01931|1|1e-22|109|pda:103713536|protein neuralized [EC:2.3.2.27]	-	-	-	gi|685342409|ref|XP_009107758.1|/0/PREDICTED: uncharacterized protein LOC103833423 [Brassica rapa]
A8S45	BrScaffold000138_80	(TCA)10caatcaacaacttcaaccttcttcttattgttatcatcatcctttactaatttctcctcatcacaatcaataacttcaatgactgaatcttgagaaactg(CTT)5	c	145	AAGACAAGGAATCAAGCATCG	59.326	TTTGAATGCCTTCAGGTTCC	60.051	278	Bra038062	A08	6864505	6867889	Bra038062	K08592|1|4e-117|423|brp:103833529|sentrin-specific protease 1 [EC:3.4.22.68]	GO:0043231//intracellular membrane-bounded organelle	GO:0019783//ubiquitin-like protein-specific protease activity	GO:0070646//protein modification by small protein removal;GO:0009908//flower development	gi|685342695|ref|XP_009107868.1|/8.2353e-117/PREDICTED: ubiquitin-like-specific protease ESD4 isoform X2 [Brassica rapa]
A8S27	BrScaffold000120_74	(TC)13	p2	26	CAGTAGAAGCAGGGTCCCAA	60.246	CAAGCCTGATTCTGGTGTCA	59.831	237	Bra036745	A08	7426801	7428973	Bra036745	K19476|1|0.0|667|brp:103833603|vacuolar protein sorting-associated protein IST1	-	-	-	gi|685342866|ref|XP_009107933.1|/0/PREDICTED: uncharacterized protein LOC103833603 [Brassica rapa]
A8S46	BrScaffold000120_7	(TTG)5tggtggtggttgat(GAG)4	c	41	ATCTCCTCCTTTGGCCATCT	60.037	TAATGGCGATTCCACAACAA	59.93	133	Bra036731	A08	7611083	7613445	Bra036731	-	GO:0043231//intracellular membrane-bounded organelle	GO:0003677//DNA binding	GO:0016049//cell growth;GO:0009414//response to water deprivation;GO:0010374//stomatal complex development;GO:0010375//stomatal complex patterning;GO:0010948//negative regulation of cell cycle process;GO:0000904//cell morphogenesis involved in differentiation	gi|685342915|ref|XP_009107944.1|/0/PREDICTED: trihelix transcription factor GTL1-like isoform X1 [Brassica rapa]
A8S28	BrScaffold000106_57	(TC)14	p2	28	AGGAATGCATCTTGGTGGAC	59.934	TATCTTTCGATTAGGGCCGA	59.638	272	Bra035487	A08	7798612	7802736	Bra035487	-	-	-	-	gi|674866695|emb|CDY67072.1|/4.48527e-72/BnaAnng23550D [Brassica napus]
A8S29	BrScaffold000156_75	(TCC)6	p3	18	GCCCTCTAACAAGCCTTTCA	59.452	AGGGACTGAAGCAAGTGTGG	60.298	253	Bra038949	A08	8524734	8527648	Bra038949	K18789|1|2e-125|451|brp:103833750|xylogalacturonan beta-1,3-xylosyltransferase [EC:2.4.2.41]	GO:0043231//intracellular membrane-bounded organelle	GO:0008194//UDP-glycosyltransferase activity	GO:0010393//galacturonan metabolic process;GO:0033692//cellular polysaccharide biosynthetic process	gi|685343253|ref|XP_009108068.1|/9.07079e-125/PREDICTED: xylogalacturonan beta-1,3-xylosyltransferase isoform X2 [Brassica rapa]
A8S30	BrScaffold000032_924	(TA)9	p2	18	TGCAAGAGAAGCTGCAAAGA	60.011	TTTGCTGGATTTGTGTGGTT	59.024	235	Bra021079	A08	9216715	9221066	Bra021079	K05607|1|1e-63|184|brp:103833979|methylglutaconyl-CoA hydratase [EC:4.2.1.18]	-	GO:0016836//hydro-lyase activity	GO:0032787//monocarboxylic acid metabolic process	gi|685343860|ref|XP_009108282.1|/0/PREDICTED: uncharacterized protein LOC103833984 isoform X1 [Brassica rapa]
A8S48	BrScaffold000032_551	(TCT)5tccatttcttcttcatcctcgtcactaccatccacactgtaacaatcaaaaccaactaaataa(CAT)4	c	90	AGCTACAGCCTTGGCATGAT	59.866	TAAAGCCTGTTCCTGACGCT	60.015	245	Bra020984	A08	9960613	9963240	Bra020984	K14791|1|3e-173|162|brp:103856920|periodic tryptophan protein 1	-	-	-	gi|685258695|ref|XP_009132290.1|/1.49807e-172/PREDICTED: periodic tryptophan protein 1 homolog [Brassica rapa]
A8S31	BrScaffold000032_458	(AT)7	p2	14	TTTGAATATTCCCACTCTGAAAA	57.811	TGATCAGCCAATCTTGTTGC	59.805	175	Bra020961	A08	10170766	10176372	Bra020961	K14794|1|4e-09|65.9|aly:ARALYDRAFT_321151|ribosomal RNA-processing protein 12	GO:0044464	-	-	gi|685344299|ref|XP_009108428.1|/1.7689e-151/PREDICTED: uncharacterized protein LOC103834121 [Brassica rapa]
A8S32	BrScaffold000032_174	(TC)7	p2	14	GTTTTCTGGTCCTTGTGCGT	60.156	CCATAGCTTTGCCTTTCACC	59.708	150	Bra020855	A08	10872716	10873991	Bra020855	K04488|1|2e-34|147|ath:AT4G04080|nitrogen fixation protein NifU and related proteins	GO:0043231//intracellular membrane-bounded organelle	GO:0046914//transition metal ion binding;GO:0051540	GO:0031163	gi|685344651|ref|XP_009108554.1|/3.46179e-50/PREDICTED: iron-sulfur cluster assembly protein 1-like [Brassica rapa]
A8S49	BrScaffold000097_290	(CTC)5	p3	15	ATCGTCGTAAGCCAGAATCG	60.235	ACCCACGAACACTAACCCAA	60.269	222	Bra034629	A08	11614656	11617065	Bra034629	K17261|1|2e-112|197|brp:103834410|adenylyl cyclase-associated protein	-	-	GO:0000902//cell morphogenesis;GO:0007010//cytoskeleton organization	gi|685345094|ref|XP_009108728.1|/1.15751e-111/PREDICTED: cyclase-associated protein 1-like [Brassica rapa]
A8S50	BrScaffold000097_101	(TCG)5	p3	15	TGAGAACCCACCACTCCTTC	60.088	CTCCTCTCGTCTCCCTCCTT	59.945	269	Bra034560	A08	12033076	12035477	Bra034560	-	GO:0043231//intracellular membrane-bounded organelle;GO:0044444//cytoplasmic part;GO:0016020//membrane	-	-	gi|685345288|ref|XP_009108804.1|/0/PREDICTED: protein CYPRO4-like [Brassica rapa]
A8S33	BrScaffold000010_395	(GA)14	p2	28	GAGCCCTCCTTTTGTGTTCC	60.999	CGCGGTCATGGTTCTTATCT	60.096	277	Bra010344	A08	13204370	13208024	Bra010344	K08738|1|2e-07|59.3|bdi:100828831|cytochrome c;K16250|2|4e-06|55.1|brp:103838307|DNA-directed RNA polymerase IV subunit 1 [EC:2.7.7.6]	-	-	-	gi|685345934|ref|XP_009109059.1|/0/PREDICTED: uncharacterized protein LOC103834736 [Brassica rapa]
A8S10	BrScaffold000010_690	(AG)12	p2	24	CAAGTTCAGCTTTGGCTTCC	59.993	CCTTGGGAGTGGCAGTAGAC	59.721	149	Bra010454	A08	13820068	13823809	Bra010454	-	-	-	-	gi|685346305|ref|XP_009109196.1|/0/PREDICTED: uncharacterized protein LOC103834861 isoform X1 [Brassica rapa]
A8S34	BrScaffold000010_737	(CA)11	p2	22	CACCTGTATGTTGCTGTCCG	60.175	TTCGGATCAAAGATTTTGGG	59.872	227	Bra010474	A08	13942223	13943099	Bra010474	K09286|1|7e-12|71.6|obr:102699502|EREBP-like factor	GO:0005811//lipid particle;GO:0016020//membrane	-	GO:0010876//lipid localization;GO:0009409//response to cold;GO:0048316//seed development	gi|674908321|emb|CDY24856.1|/2.83367e-49/BnaA08g14540D [Brassica napus]
A8S53	BrScaffold000010_768	(TG)6tttgggtataatgcaaaaactttactg(TGTT)6	c	63	CCGGTGTATCAGTTCTGCAA	59.716	TTCTGCGATAGGCTTCCACT	59.978	265	Bra010481	A08	13978395	13981065	Bra010481	K08869|1|2e-69|199|brp:103834892|aarF domain-containing kinase	GO:0009536//plastid	GO:0016301//kinase activity;GO:0032559	GO:0006464//cellular protein modification process	gi|685346413|ref|XP_009109235.1|/9.18688e-69/PREDICTED: uncharacterized aarF domain-containing protein kinase 1 [Brassica rapa]
A8S11	BrScaffold000010_1018	(GTT)4	p3	12	GGCGAAATCCATCTCTTTCA	60.155	CTATGGTTGACGAAGCAGCA	60.011	263	Bra010580	A08	14531816	14533848	Bra010580	K11291|1|2e-71|226|brp:103864825|nuclear autoantigenic sperm protein	-	-	-	gi|685346728|ref|XP_009109349.1|/1.08278e-113/PREDICTED: NASP-related protein sim3-like [Brassica rapa]
A8S54	BrScaffold000010_1350	(CAT)8	p3	24	GCAATTGTTGCCGAGATTTT	60.081	CAATGGTTCCTCGTCGAGTT	60.111	248	Bra010687	A08	15214632	15216764	Bra010687	K11851|1|7e-109|395|brp:103835125|ubiquitin carboxyl-terminal hydrolase 30 [EC:3.4.19.12]	-	GO:0008234//cysteine-type peptidase activity	-	gi|685347060|ref|XP_009109473.1|/4.10538e-108/PREDICTED: ubiquitin carboxyl-terminal hydrolase 27 [Brassica rapa]
A8S12	BrScaffold000010_1480	(AG)13	p2	26	CTCTTGCTCGTAGGTTTCCG	60.008	GGAGTCCACTTCATGGAGGA	60.048	255	Bra010740	A08	15422937	15428174	Bra010740	K08900|1|4e-17|92.4|cit:102628180|mitochondrial chaperone BCS1	-	-	-	gi|674943231|emb|CDX90280.1|/0/BnaA08g17040D [Brassica napus]
A8S35	BrScaffold000010_1759	(AGC)7	p3	21	CAGTCCACACACACACCACA	60.088	GGAGATTATCGCCGTTCGTA	60.06	207	Bra010824	A08	15883186	15884153	Bra010824	-	-	-	-	gi|685347572|ref|XP_009109658.1|/1.69587e-69/PREDICTED: uncharacterized protein LOC103835267 [Brassica rapa]
A8S55	BrScaffold000010_1852	(GA)9	p2	18	CCTCTGTATCTGCGTCGTCA	60.008	AATCCATCATCAACTTCGCC	59.9	121	Bra010865	A08	16062414	16063668	Bra010865	-	-	-	-	gi|674943107|emb|CDX90156.1|/7.43287e-38/BnaA08g18280D [Brassica napus]
A8S13	BrScaffold000010_1990	(TCT)7	p3	21	TCCTCTTCTGGCTGTTGTGA	59.545	ATGGAAAGACAGTTGGTGGC	59.973	205	Bra010919	A08	16329399	16334290	Bra010919	K18667|1|0.0|897|brp:103835373|activating signal cointegrator complex subunit 2	-	GO:0005488	-	gi|685347999|ref|XP_009109777.1|/0/PREDICTED: activating signal cointegrator 1 complex subunit 2 isoform X2 [Brassica rapa]
A8S36	BrScaffold000010_2071	(GGT)6	p3	18	TTCGATGATCTGGTGGATGA	60.006	TCTCCCGAAGACAAGCAAGT	59.989	240	Bra010957	A08	16494096	16494740	Bra010957	-	-	-	-	gi|685348138|ref|XP_009109829.1|/7.60045e-60/PREDICTED: uncharacterized protein LOC103835414 [Brassica rapa]
A8S56	BrScaffold000010_2142	(GAT)7	p3	21	AGAGGCCAATTTGAATGCAC	60.081	AGCGGAATAAACGCAAGAGA	59.982	269	Bra010990	A08	16667568	16670618	Bra010990	K04733|1|2e-136|157|brp:103835452|interleukin-1 receptor-associated kinase 4 [EC:2.7.11.1]	GO:0044444//cytoplasmic part	GO:0016301//kinase activity;GO:0019899//enzyme binding	GO:0008104//protein localization;GO:0006468//protein phosphorylation	gi|674854887|emb|CDY70904.1|/0/BnaAnng35500D, partial [Brassica napus]
A8S37	BrScaffold000020_3	(CT)13	p2	26	TAGAAAATGATGCCCTTGGC	60.038	CTACGCCACACCATGTGAAG	60.175	264	Bra016271	A08	16862040	16866954	Bra016271	K01873|1|0.0|430|brp:103835594|valyl-tRNA synthetase [EC:6.1.1.9]	-	GO:0016874//ligase activity	GO:0006412//translation	gi|685348561|ref|XP_009110012.1|/0/PREDICTED: valine--tRNA ligase-like [Brassica rapa]
A8S15	BrScaffold000020_96	(CCA)8cgtccccttcctctgttgttgtagtggctcctttggtaaccgtttccacctgaattatcataagattcataccgcccgtttgagtat(CCA)4	c	123	GAGAGACGCACTCAAAAGCC	60.142	AGAGGTTATTCCAATGCCCC	60.152	256	Bra016305	A08	17038389	17040248	Bra016305	-	-	-	-	gi|685348694|ref|XP_009110060.1|/1.80311e-115/PREDICTED: uncharacterized protein LOC103835629 [Brassica rapa]
A8S38	BrScaffold000020_169	(CT)13	p2	26	GTCATCGGAGCTCCATTTGT	60.081	ACCGTTAAGGCTTGTTGTGG	60.03	249	Bra016336	A08	17175958	17177660	Bra016336	K07304|1|3e-24|114|brp:103847056|peptide-methionine (S)-S-oxide reductase [EC:1.8.4.11]	GO:0044444//cytoplasmic part	GO:0016671//oxidoreductase activity, acting on a sulfur group of donors, disulfide as acceptor	GO:0006979//response to oxidative stress;GO:0009628//response to abiotic stimulus;GO:0043412//macromolecule modification	gi|674891259|emb|CDY41436.1|/3.29639e-25/BnaA08g20380D [Brassica napus]
A8S39	BrScaffold000020_501	(AG)7	p2	14	CCGGTCTTGCCTGTAAACAT	59.993	GGGCACCAGACAGGTAAAGA	60.111	109	Bra016459	A08	17802456	17805674	Bra016459	K03781|1|0.0|609|brp:103835788|catalase [EC:1.11.1.6]	GO:0005840//ribosome;GO:0030312//external encapsulating structure;GO:0009532//plastid stroma;GO:0009526//plastid envelope;GO:0042579//microbody;GO:0005576//extracellular region;GO:0016020//membrane	GO:0004601//peroxidase activity;GO:0015171//amino acid transmembrane transporter activity;GO:0005506//iron ion binding	GO:0009314//response to radiation;GO:0010038//response to metal ion;GO:0009267//cellular response to starvation;GO:0042743//hydrogen peroxide metabolic process;GO:0015837//amine transport	gi|396075514|gb|AFN81244.1|/0/catalase 2 [Brassica rapa subsp. pekinensis]
A8S16	BrScaffold000020_543	(GAA)7	p3	21	TCCCAGCCCACTTTACTGAC	60.111	TGAAATGCTCACTTTGGGTTC	60.103	204	Bra016478	A08	17879421	17882117	Bra016478	K12486|1|2e-07|59.3|cic:CICLE_v10005234mg|stromal membrane-associated protein	-	-	-	gi|685349192|ref|XP_009110242.1|/0/PREDICTED: synaptotagmin-2-like [Brassica rapa]
A8S57	BrScaffold000020_598	(CAA)5cct(TCC)6	c	36	ACATGGCGGTTTATTACCCA	60.074	ATTCTGAAGACCCGTTGGTG	59.966	185	Bra016497	A08	17988459	17990821	Bra016497	K16670|1|2e-22|107|bdi:100844103|homeobox protein Meis2;K15613|5|1e-07|42.7|pper:PRUPE_ppa006566mg|homeobox protein Meis1	-	GO:0005488	GO:0050789	gi|685349239|ref|XP_009110262.1|/8.66047e-178/PREDICTED: BEL1-like homeodomain protein 10 [Brassica rapa]
A8S17	BrScaffold000020_922	(CAG)8	p3	24	GCAAAATGTAGCCGGAATGT	59.967	TTGCTGCTGTAGCTGTTGCT	59.958	181	Bra016651	A08	18653225	18659101	Bra016651	K14972|1|0.0|560|brp:103836018|PAX-interacting protein 1	-	-	-	gi|685349812|ref|XP_009110473.1|/0/PREDICTED: mediator of RNA polymerase II transcription subunit 15a-like [Brassica rapa]
A8S58	BrScaffold000020_1103	(TTG)7	p3	21	GTTGAGGAGAGAAGCCATGC	59.957	TCAGATTCAACAGTGGAGCG	59.984	131	Bra016749	A08	19030867	19032688	Bra016749	K16190|1|9e-06|52.8|bdi:100843665|glucuronokinase [EC:2.7.1.43]	GO:0043231//intracellular membrane-bounded organelle	GO:0003676//nucleic acid binding	GO:0010440//stomatal lineage progression;GO:0006355//regulation of transcription, DNA-templated;GO:0009409//response to cold	gi|685350153|ref|XP_009110613.1|/2.05868e-113/PREDICTED: transcription factor SCREAM2-like [Brassica rapa]
2s16	BrScaffold000020_1112	(GAT)5	p3	15	CGTCGAGGACTAGGAGACGA	60.545	CAAGTCACAAGCACAATGGC	60.31	275	Bra016753	A08	19039381	19039902	Bra016753	-	-	-	-	gi|685350167|ref|XP_009110619.1|/6.36881e-46/PREDICTED: histone H2A.Z-specific chaperone CHZ1-like [Brassica rapa]
A8S18	BrScaffold000072_618	(AG)11	p2	22	ATCCCACCTTGCGTACAAAC	59.859	TACGAAGTGCAGAGCAATCG	60.157	162	Bra030790	A08	19586542	19589988	Bra030790	K03233|1|0.0|303|brp:103836321|elongation factor 1-gamma	GO:0043234//protein complex;GO:0043231//intracellular membrane-bounded organelle;GO:0016020//membrane;GO:0030312//external encapsulating structure	GO:0008135//translation factor activity, RNA binding;GO:0046914//transition metal ion binding	GO:0006412//translation;GO:0010038//response to metal ion	gi|685350625|ref|XP_009110814.1|/0/PREDICTED: probable elongation factor 1-gamma 1 [Brassica rapa]
A8S40	BrScaffold000072_582	(AC)7	p2	14	CTCCTTGTCGTAAGCATCCA	58.874	TGATTGCTTGTTCTGAATCTTGA	59.875	185	Bra030763	A08	19675312	19680925	Bra030763	K08057|1|8e-119|206|brp:103836348|calreticulin	GO:0043231//intracellular membrane-bounded organelle	GO:0046872//metal ion binding;GO:0005515//protein binding	GO:0006970//response to osmotic stress;GO:0044267//cellular protein metabolic process	gi|685350690|ref|XP_009110842.1|/4.43345e-118/PREDICTED: calreticulin-2 [Brassica rapa]
A8S59	BrScaffold000072_450	(AGA)4gagaaagaaagatgat(AAG)5	c	43	GCCTAGGAGCATAGGGAAGG	60.187	CGTGGGAGAAGAAGATCCAA	60.187	232	Bra030707	A08	19941960	19945053	Bra030707	K03231|1|0.0|608|aly:ARALYDRAFT_311847|elongation factor 1-alpha	GO:0031981//nuclear lumen;GO:0009536//plastid;GO:0031090//organelle membrane	GO:0017111//nucleoside-triphosphatase activity;GO:0008135//translation factor activity, RNA binding;GO:0032561//guanyl ribonucleotide binding;GO:0005515//protein binding	GO:0006412//translation;GO:0010038//response to metal ion;GO:0009207	gi|8778823|gb|AAF79822.1|AC026875_2/0/T6D22.2 [Arabidopsis thaliana]
A8S19	BrScaffold000072_279	(AACA)3aaattggttaaggaaagaa(AG)12t(GA)15gt(GA)16	c	120	GCTGCTTCTGTGCTCTACTTCA	59.965	GCAGATGTTCCTGCTCCTTC	59.957	270	Bra030611	A08	20324211	20326824	Bra030611	K01099|1|1e-53|151|gmx:100792720|phosphatidylinositol-bisphosphatase [EC:3.1.3.36]	-	-	GO:0009725//response to hormone;GO:0042445//hormone metabolic process;GO:0019932//second-messenger-mediated signaling;GO:0010065;GO:0046838//phosphorylated carbohydrate dephosphorylation;GO:0043647//inositol phosphate metabolic process;GO:0010051//xylem and phloem pattern formation	gi|685351200|ref|XP_009111052.1|/2.22201e-140/PREDICTED: type I inositol 1,4,5-trisphosphate 5-phosphatase CVP2 [Brassica rapa]
A8S60	BrScaffold000072_176	(AAG)6	p3	18	CGAGGATTCCTTCGTAGCTG	59.971	ACATTGTTAGTTCACGGCCC	59.859	142	Bra030564	A08	20525461	20533788	Bra030564	K14509|1|0.0|1107|brp:103836581|ethylene receptor [EC:2.7.13.-]	GO:0043231//intracellular membrane-bounded organelle	GO:0004871//signal transducer activity;GO:0004673//protein histidine kinase activity;GO:0072328	GO:0009873//ethylene-activated signaling pathway	gi|685351340|ref|XP_009111113.1|/0/PREDICTED: ethylene response sensor 2-like [Brassica rapa]
A8S20	BrScaffold000072_47	(TCA)7	p3	21	CAATGGCTCTTCCTCTTTCG	59.948	ACTCCTTGAGGAGAGGGAGG	59.801	258	Bra030504	A08	20766886	20768973	Bra030504	K01358|1|3e-77|258|brp:103836649|ATP-dependent Clp protease, protease subunit [EC:3.4.21.92]	GO:0009526//plastid envelope;GO:0009368//endopeptidase Clp complex;GO:0031976;GO:0009532//plastid stroma	-	-	gi|685351541|ref|XP_009111195.1|/1.70351e-76/PREDICTED: ATP-dependent Clp protease proteolytic subunit 5, chloroplastic-like [Brassica rapa]
A9S21	BrScaffold000128_32	(GGA)7	p3	21	CCAATTGTTAACGCTTTTGGA	59.986	GCTCTTCTTCTTCCCTCCGT	59.957	224	Bra037320	A09	54270	57129	Bra037320	K16911|1|6e-07|57.4|pvu:PHAVU_007G207200g|ATP-dependent RNA helicase DDX21 [EC:3.6.4.13]	-	GO:0005488	GO:0001708//cell fate specification;GO:0006351//transcription, DNA-templated;GO:0048608//reproductive structure development	gi|685352311|ref|XP_009111509.1|/1.66292e-30/PREDICTED: axial regulator YABBY 3 isoform X1 [Brassica rapa]
A9S41	BrScaffold000128_123	(AAC)6	p3	18	CTCCGCAAGTTTCCTTTTTG	59.855	TTAGAGTTGATGGCAGCACG	60.011	233	Bra037351	A09	209904	212483	Bra037351	K12614|1|0.0|173|eus:EUTSA_v10028588mg|ATP-dependent RNA helicase DDX6/DHH1 [EC:3.6.4.13]	-	GO:0032559;GO:0042623//ATPase activity, coupled	-	gi|567160743|ref|XP_006396262.1|/0/hypothetical protein EUTSA_v10028588mg [Eutrema salsugineum]
A9S42	BrScaffold000128_203	(TG)8	p2	16	GGCAACGGTACAATTCTCGT	60	CAGGTATCCAATCCCCACTG	60.187	173	Bra037385	A09	375834	377530	Bra037385	-	-	-	-	gi|685352077|ref|XP_009111417.1|/6.59227e-151/PREDICTED: protein trichome birefringence-like 26 [Brassica rapa]
A9S43	BrScaffold000114_177	(CAT)6	p3	18	GATTAGGCGAGCGCATAGAG	60.103	TCGCCTCTCAATCTCATCCT	59.91	267	Bra036300	A09	740279	745641	Bra036300	K11430|1|0.0|371|brp:103836786|histone-lysine N-methyltransferase EZH2 [EC:2.1.1.43]	GO:0043231//intracellular membrane-bounded organelle	GO:0003723//RNA binding	GO:0040029//regulation of gene expression, epigenetic;GO:0003006//developmental process involved in reproduction	gi|685351858|ref|XP_009111326.1|/0/PREDICTED: histone-lysine N-methyltransferase EZA1 isoform X1 [Brassica rapa]
A9S45	BrScaffold000114_71	(GTT)6	p3	18	AGAACGCGACGGTAATCATC	60.103	ATTTCTCCGATCCCTTTTGG	60.258	268	Bra036251	A09	1037035	1039128	Bra036251	-	GO:0044424	GO:0001071//nucleic acid binding transcription factor activity;GO:0003677//DNA binding;GO:0046983//protein dimerization activity	GO:0033554//cellular response to stress;GO:0002239//response to oomycetes;GO:0010467//gene expression	gi|685351711|ref|XP_009111266.1|/2.65209e-80/PREDICTED: basic leucine zipper 10 [Brassica rapa]
A9S1	BrScaffold000114_53	(CCG)4ccc(CCG)4	c	27	AAGCCTCGGGTCTCTTTAGC	59.983	CACCGGAGCTTCTTCTTTCA	60.508	185	Bra036240	A09	1073216	1074451	Bra036240	K02692|1|1e-101|370|brp:103836715|photosystem I subunit II	GO:0009526//plastid envelope;GO:0009570//chloroplast stroma;GO:0009534//chloroplast thylakoid;GO:0009522//photosystem I	-	GO:0044237//cellular metabolic process	gi|685351687|ref|XP_009111256.1|/5.37675e-101/PREDICTED: photosystem I reaction center subunit II-1, chloroplastic [Brassica rapa]
A9S23	BrScaffold000093_347	(AG)9	p2	18	TTCAATCTTTGTGAAACAGAGC	57.154	GTGATGATCAGATGGCGATG	60.039	224	Bra034183	A09	1172565	1177069	Bra034183	-	-	-	-	gi|674911102|emb|CDY22100.1|/0/BnaA09g01290D [Brassica napus]
A9S24	BrScaffold000093_417	(AG)14	p2	28	CCAAGTGAAGGATAATGCTCG	59.716	ACAATGGGGATGTTGTGGTT	59.95	170	Bra034214	A09	1319552	1321200	Bra034214	K03671|1|9e-56|218|brp:103846588|thioredoxin 1	GO:0009532//plastid stroma;GO:0009534//chloroplast thylakoid	GO:0015036//disulfide oxidoreductase activity;GO:0030234//enzyme regulator activity	GO:0018904;GO:0019725//cellular homeostasis;GO:0044093	gi|685266823|ref|XP_009121784.1|/5.02813e-55/PREDICTED: thioredoxin M2, chloroplastic [Brassica rapa]
A9S46	BrScaffold000093_431	(TCT)7	p3	21	GCCTCCTCACTGTCTCTTGC	60.143	AAGGGGCGATTCTAAAAGGA	60.034	211	Bra034219	A09	1348687	1353271	Bra034219	K16900|1|1e-168|166|crb:CARUB_v10000313mg|two pore calcium channel protein, plant	GO:0031090//organelle membrane;GO:0005773//vacuole	GO:0005262//calcium channel activity	GO:0010118//stomatal movement;GO:0019932//second-messenger-mediated signaling;GO:0009695//jasmonic acid biosynthetic process;GO:0032412//regulation of ion transmembrane transporter activity;GO:0032501//multicellular organismal process;GO:0070838//divalent metal ion transport	gi|565458283|ref|XP_006287141.1|/7.02612e-168/hypothetical protein CARUB_v10000313mg [Capsella rubella]
A9S25	BrScaffold000113_252	(AT)12	p2	24	CAAAAGGTCACGCAGATGAA	59.84	AGCAAATTTACTGCGGAAGG	59.361	276	Bra036199	A09	1995727	2000203	Bra036199	K02940|1|3e-26|95.1|sita:101773010|large subunit ribosomal protein L9e;K01623|5|3e-19|73.2|pda:103722777|fructose-bisphosphate aldolase, class I [EC:4.1.2.13]	-	-	-	gi|567141086|ref|XP_006395253.1|/3.22669e-73/hypothetical protein EUTSA_v10004454mg [Eutrema salsugineum]
A9S48	BrScaffold000113_224	(AAC)8	p3	24	TCCAACAACAACTCTGACGC	59.88	CTCTAGCGATGTCTCGGACC	59.973	214	Bra036184	A09	2049271	2051701	Bra036184	-	GO:0043231//intracellular membrane-bounded organelle	GO:0046914//transition metal ion binding;GO:0042802//identical protein binding;GO:0046983//protein dimerization activity	GO:0010074//maintenance of meristem identity;GO:0010015//root morphogenesis;GO:0003006//developmental process involved in reproduction;GO:0010467//gene expression;GO:0046739//transport of virus in multicellular host	gi|685353151|ref|XP_009111828.1|/0/PREDICTED: protein OBERON 2 [Brassica rapa]
A9S2	BrScaffold000113_178	(TGA)7	p3	21	TGAGGAGTATCCTTGGTGGG	59.92	TTCCCACTCCTCCTCACATC	60.048	160	Bra036165	A09	2128548	2130215	Bra036165	K00988|1|6e-20|99.8|vcn:VOLCADRAFT_92922|ATP adenylyltransferase [EC:2.7.7.53]	-	-	-	gi|685353193|ref|XP_009111846.1|/3.49437e-80/PREDICTED: uncharacterized protein LOC103837258 [Brassica rapa]
A9S49	BrScaffold000113_27	(GA)12	p2	24	TATGCAGGCTAAACCGATCC	60.06	AGATGATGCAGCCTTGCTCT	60.127	252	Bra036114	A09	2412752	2414449	Bra036114	K01738|1|4e-133|176|brp:103837318|cysteine synthase A [EC:2.5.1.47]	-	GO:0016835//carbon-oxygen lyase activity;GO:0048037//cofactor binding	GO:0006563//L-serine metabolic process;GO:0000097//sulfur amino acid biosynthetic process	gi|2245144|emb|CAA71799.1|/2.15025e-132/O-acetylserine(thiol) lyase [Brassica juncea]
A9S50	BrScaffold000118_188	(TG)7	p2	14	TGCAGCTTATGATATTTGGCA	59.323	GGAGTGCATCTTCCATGGTT	59.934	189	Bra036587	A09	2712358	2714899	Bra036587	K00654|1|8e-16|65.5|pda:103698677|serine palmitoyltransferase [EC:2.3.1.50]	GO:0044464	-	-	gi|685352820|ref|XP_009111712.1|/5.67761e-117/PREDICTED: protein notum homolog [Brassica rapa]
A9S51	BrScaffold000118_44	(TCA)6	p3	18	TGTTCCTCCTCGCTCTTCAT	59.95	CTGCAACAAGTTGGCAAGAA	60.027	136	Bra036527	A09	2987263	2988027	Bra036527	-	-	-	-	gi|685352655|ref|XP_009111646.1|/3.53024e-95/PREDICTED: uncharacterized protein LOC103837072 isoform X1 [Brassica rapa]
A9S52	BrScaffold000110_146	(TTC)6	p3	18	TCGTTTCGTCTCTTCGCTTT	60.132	GGACTCTCGAAACGATGGAA	60.195	150	Bra035882	A09	3741346	3742077	Bra035882	-	-	-	-	gi|685353691|ref|XP_009112032.1|/6.48683e-104/PREDICTED: uncharacterized protein LOC103837426 [Brassica rapa]
A9S28	BrScaffold000110_63	(TGA)9	p3	27	TTGTTGAGCAATGGGACAAA	60.088	CCTTGACAAAGTGCCAGTCTT	59.386	120	Bra035861	A09	3858592	3861225	Bra035861	-	-	-	-	gi|674916336|emb|CDY16740.1|/3.28528e-152/BnaA09g06420D [Brassica napus]
A9S53	BrScaffold000133_56	(AAC)8	p3	24	CGCGAGAACGAGGTAACAAT	60.27	CGTTGTAATTCGCAGCTTCC	60.772	166	Bra037769	A09	4084384	4089662	Bra037769	-	-	GO:0005515//protein binding	GO:0009409//response to cold	gi|674914582|emb|CDY18719.1|/6.2688e-154/BnaA09g06760D [Brassica napus]
A9S29	BrScaffold000133_87	(CA)9	p2	18	CTTCGGAAGTGATAATCGCC	59.668	CTATCATGCACCGTGTCCAG	60.136	258	Bra037781	A09	4142777	4145245	Bra037781	K16075|1|1e-120|309|brp:103837534|magnesium transporter	-	GO:0046873//metal ion transmembrane transporter activity	GO:0070838//divalent metal ion transport	gi|685353970|ref|XP_009112139.1|/7.50556e-120/PREDICTED: magnesium transporter MRS2-2-like [Brassica rapa]
A9S54	BrScaffold000133_148	(CCA)8	p3	24	GTCTCTAACGCCTCAATCGC	59.985	CGATCGATAACCGGAAGAAA	60.031	230	Bra037800	A09	4249051	4249959	Bra037800	K11982|1|2e-130|465|brp:103837560|E3 ubiquitin-protein ligase RNF115/126 [EC:2.3.2.27]	GO:0044424	GO:0005488	GO:0032446//protein modification by small protein conjugation	gi|685354034|ref|XP_009112165.1|/1.32669e-129/PREDICTED: E3 ubiquitin-protein ligase CIP8 [Brassica rapa]
A9S4	BrScaffold000133_188	(CA)10(TA)14	c	48	GAATGAGTCACAAGACACACAGC	59.831	AAAGCAGCAATTGGGTGTTC	60.118	279	Bra037817	A09	4334676	4336469	Bra037817	K18810|1|4e-63|165|aly:ARALYDRAFT_686270|cyclin D1/2/4, plant	-	GO:0019887//protein kinase regulator activity;GO:0005488	GO:0010374//stomatal complex development;GO:0051318;GO:0034285	gi|674952108|emb|CDX81286.1|/1.75822e-71/BnaC09g06970D [Brassica napus]
A9S55	BrScaffold000126_35	(CTT)5attctccacctaatcaatccaatcaccaattacatacctccggatccaaaacagtagc(AGA)6	c	91	TGGATGATCTTAAGCCCCAA	60.405	ACGGAAACAAAAATGGCAAA	60.335	259	Bra037125	A09	4564557	4567632	Bra037125	K13717|1|5e-44|100|aly:ARALYDRAFT_496882|OTU domain-containing protein 3 [EC:3.4.19.12]	-	-	-	gi|297797661|ref|XP_002866715.1|/2.76352e-43/hypothetical protein ARALYDRAFT_496882 [Arabidopsis lyrata subsp. lyrata]
A9S30	BrScaffold000126_135	(GGA)9	p3	27	AGCGAGCTTCAGAGGAAATG	59.717	GAAGAGGAAAGAAGGCCCAC	60.19	259	Bra037160	A09	4726382	4728787	Bra037160	-	-	-	GO:0006950//response to stress	gi|685354547|ref|XP_009112381.1|/1.48009e-145/PREDICTED: protein DA1-related 6-like, partial [Brassica rapa]
A9S56	BrScaffold000126_202	(GT)9	p2	18	AACCCAATCCCGAATCTTTC	60.131	GTCCCTTGTGCAGAGGACAT	60.12	253	Bra037186	A09	4819973	4823849	Bra037186	K18757|1|1e-80|255|brp:103837670|la-related protein 1	-	GO:0046914//transition metal ion binding	GO:0009743//response to carbohydrate	gi|685354309|ref|XP_009112277.1|/6.94863e-80/PREDICTED: la-related protein 1B [Brassica rapa]
A9S5	BrScaffold000127_216	(AT)9	p2	18	AGATATAGCACACATTGAAACATATTG	57.828	TTAGGAAGCGGGTACGTGTT	59.632	263	Bra037285	A09	5137967	5145639	Bra037285	-	-	-	-	gi|685354610|ref|XP_009112409.1|/2.22371e-49/PREDICTED: hippocampus abundant transcript 1 protein-like isoform X1 [Brassica rapa]
A9S31	BrScaffold000127_37	(TA)9	p2	18	TCGTGCAGTCGTGCTTATTC	60.019	AATCAGTCGTTGACGTTCCC	59.973	194	Bra037225	A09	5521392	5525730	Bra037225	K17681|1|2e-120|230|mus:103983845|ATPase family AAA domain-containing protein 3A/B	-	GO:0017111//nucleoside-triphosphatase activity;GO:0046914//transition metal ion binding;GO:0032559	-	gi|695024431|ref|XP_009399430.1|/1.07144e-119/PREDICTED: ATPase family AAA domain-containing protein 3-like [Musa acuminata subsp. malaccensis]
A9S58	BrScaffold000148_158	(TGG)7	p3	21	CACTAGGTCCACCGTCAGGT	60.026	CATCTTCCCCCATGTTCATC	60.135	240	Bra038552	A09	5661477	5664682	Bra038552	-	-	GO:0005515//protein binding	-	gi|685355003|ref|XP_009112562.1|/3.95403e-129/PREDICTED: uncharacterized protein LOC103837921 [Brassica rapa]
A9S6	BrScaffold000119_228	(AT)13	p2	26	TCCGAGGGAAGAAGGTAACA	59.665	TGATCACATTCTCTAAGAACAAAGA	57.285	280	Bra036707	A09	5924764	5925849	Bra036707	K05759|1|6e-20|99.0|brp:103842625|profilin	GO:0016020//membrane;GO:0030312//external encapsulating structure;GO:0009536//plastid;GO:0031981//nuclear lumen;GO:0015630//microtubule cytoskeleton	GO:0008092//cytoskeletal protein binding	GO:0007015//actin filament organization;GO:0000902//cell morphogenesis	gi|674911359|emb|CDY21648.1|/3.29047e-19/BnaA09g43990D [Brassica napus]
A9S32	BrScaffold000119_134	(TCT)7	p3	21	GAGAGGATTCAGCCACGAAA	60.34	GGCTCGAACCATTTGTCTTC	59.676	249	Bra036682	A09	6093503	6098922	Bra036682	K05666|1|0.0|353|fve:101300583|ATP-binding cassette, subfamily C (CFTR/MRP), member 2	-	-	-	gi|685355256|ref|XP_009112666.1|/0/PREDICTED: ABC transporter C family member 5-like [Brassica rapa]
A9S59	BrScaffold000119_53	(TA)13	p2	26	GACTCTCAAACCCACAAATGG	59.439	GTGATCCGTCTGAAGGTCG	59.196	250	Bra036653	A09	6265222	6269596	Bra036653	K01193|1|0.0|445|brp:103838037|beta-fructofuranosidase [EC:3.2.1.26]	GO:0043231//intracellular membrane-bounded organelle	GO:0004558//alpha-1,4-glucosidase activity	GO:0044238//primary metabolic process	gi|685355339|ref|XP_009112697.1|/0/PREDICTED: acid beta-fructofuranosidase 3, vacuolar-like [Brassica rapa]
A9S33	BrScaffold000057_406	(CA)9	p2	18	TCTGACACAACCCACAGCTC	59.872	TATTCCAAGGCGGTATTTGC	59.928	182	Bra027728	A09	7027797	7031863	Bra027728	K06158|1|4e-126|150|mtr:MTR_3g080970|ATP-binding cassette, subfamily F, member 3	-	-	-	gi|357462361|ref|XP_003601462.1|/2.40272e-125/ABC transporter family protein [Medicago truncatula]
A9S60	BrScaffold000057_376	(CT)11	p2	22	TTGGTGGGAACAGATTGACA	59.935	GCTCTCAGCAGTGCTATCCC	60.127	275	Bra027719	A09	7083721	7084851	Bra027719	-	GO:0031224//intrinsic component of membrane;GO:0043231//intracellular membrane-bounded organelle	-	GO:0044267//cellular protein metabolic process	gi|685355742|ref|XP_009112851.1|/7.41494e-54/PREDICTED: uncharacterized protein C119.09c-like [Brassica rapa]
A9S7	BrScaffold000057_112	(CT)14	p2	28	GGATCCACTAGAGCACGAGG	59.827	GGTGTAAGGCCGTGTGAACT	60.035	187	Bra027641	A09	7612797	7619657	Bra027641	K17686|1|0.0|626|obr:102705621|Cu+-exporting ATPase [EC:3.6.3.54]	GO:0043231//intracellular membrane-bounded organelle;GO:0016020//membrane	GO:0015662//ATPase activity, coupled to transmembrane movement of ions, phosphorylative mechanism;GO:0046873//metal ion transmembrane transporter activity;GO:0000166//nucleotide binding	GO:0009987//cellular process;GO:0008152//metabolic process;GO:0030001//metal ion transport	gi|573942552|ref|XP_006653660.1|/0/PREDICTED: probable copper-transporting ATPase HMA5-like [Oryza brachyantha]
A9S34	BrScaffold000058_535	(AT)14	p2	28	CCAAATCCTCAATGGGAGAA	59.864	TTCCCGGCAATACATCAAAT	60.153	237	Bra027983	A09	10741100	10746879	Bra027983	K11422|1|2e-35|96.3|pmum:103330802|histone-lysine N-methyltransferase SETD1 [EC:2.1.1.43]	GO:0044424	-	GO:0034968//histone lysine methylation;GO:0009908//flower development	gi|685357329|ref|XP_009113446.1|/0/PREDICTED: LOW QUALITY PROTEIN: uncharacterized protein LOC103838745 [Brassica rapa]
A9S35	BrScaffold000022_792	(TA)12	p2	24	AATGCCTCCATTGTCCTCTG	60.073	GAGAAATGCCCGTCTGGTAA	60.074	269	Bra017541	A09	12924963	12926258	Bra017541	-	GO:0044464	-	-	gi|685359539|ref|XP_009114344.1|/3.21025e-35/PREDICTED: uncharacterized protein LOC103839594 [Brassica rapa]
A9S36	BrScaffold000022_313	(AT)10	p2	20	TGGAAGCAGAAAAACAGCAA	59.585	GGCATGTGATACCCACGAAG	61.329	224	Bra017410	A09	14045299	14046181	Bra017410	K10573|1|2e-44|115|crb:CARUB_v10021094mg|ubiquitin-conjugating enzyme E2 A [EC:2.3.2.23]	-	GO:0019787//ubiquitin-like protein transferase activity	GO:0019941//modification-dependent protein catabolic process;GO:0032446//protein modification by small protein conjugation	gi|604330972|gb|EYU35873.1|/1.25554e-44/hypothetical protein MIMGU_mgv1a015600mg [Erythranthe guttata]
A9S9	BrScaffold000066_379	(TA)10	p2	20	TCACAACACGGTTTGAGTCC	59.571	TCCAACACTCTCAGTCGTGC	60.03	227	Bra029519	A09	17925641	17940415	Bra029519	K07305|1|3e-52|116|brp:103839813|peptide-methionine (R)-S-oxide reductase [EC:1.8.4.12]	GO:0009536//plastid	GO:0046873//metal ion transmembrane transporter activity;GO:0005451//monovalent cation:proton antiporter activity	GO:0006810//transport	gi|565458225|ref|XP_006287112.1|/5.17605e-145/hypothetical protein CARUB_v10000273mg [Capsella rubella]
A9S37	BrScaffold000040_685	(AT)17	p2	34	TGGATGTTGTTTGGTTGATGA	59.808	TGGTTCAGGATATTGACTCCC	58.85	246	Bra023280	A09	20046333	20049414	Bra023280	-	-	-	-	gi|674932120|emb|CDY01253.1|/3.45974e-65/BnaC05g24790D [Brassica napus]
A9S10	BrScaffold000040_611	(TC)10	p2	20	CATGGTTAAAACAATGGCCC	60.053	AAGGGAGAGTACAAGAAACACCA	59.199	159	Bra023254	A09	20238662	20243940	Bra023254	-	-	-	GO:0006351//transcription, DNA-templated;GO:0009943//adaxial/abaxial axis specification;GO:0048437//floral organ development	gi|685360849|ref|XP_009114900.1|/1.4919e-86/PREDICTED: probable transcription factor KAN2 isoform X1 [Brassica rapa]
A9S38	BrScaffold000081_407	(TTC)7	p3	21	ATCGCCAAGCAAGCAAATAC	60.238	CCATTCGCCAGAACATCTTT	60.074	266	Bra032392	A09	21853841	21866247	Bra032392	K04733|1|2e-97|235|pop:POPTR_0011s12900g|interleukin-1 receptor-associated kinase 4 [EC:2.7.11.1]	GO:0043231//intracellular membrane-bounded organelle;GO:0016020//membrane	GO:0019899//enzyme binding;GO:0004674//protein serine/threonine kinase activity	-	gi|685361426|ref|XP_009115145.1|/0/PREDICTED: receptor-like serine/threonine-protein kinase SD1-8 isoform X2 [Brassica rapa]
A9S11	BrScaffold000084_303	(GCT)7	p3	21	TTCCATCATCAACTCCGACA	60.048	ACCTGTCCTGTCTGAAACCG	60.151	259	Bra032882	A09	23325846	23326688	Bra032882	-	-	-	-	gi|674885955|emb|CDY46621.1|/1.09604e-127/BnaA09g27480D [Brassica napus]
A9S12	BrScaffold000045_607	(AG)13	p2	26	AACCAGCAATGAAAACGTCC	59.978	AAGTGCTTCTTTTGGCCTGA	59.993	261	Bra024715	A09	24602501	24605206	Bra024715	-	GO:0043231//intracellular membrane-bounded organelle	-	-	gi|685361959|ref|XP_009115364.1|/0/PREDICTED: pentatricopeptide repeat-containing protein At1g26460, mitochondrial [Brassica rapa]
A9S39	BrScaffold000045_337	(CTC)7	p3	21	CACCAGATCTGATTCAGCCA	59.787	CTTGGGAAGTTCAGGAGCAG	59.982	159	Bra024628	A09	25159825	25160925	Bra024628	K19041|1|9e-72|271|egu:105050317|E3 ubiquitin-protein ligase RNF38/44 [EC:2.3.2.27]	-	GO:0046872//metal ion binding	-	gi|685362272|ref|XP_009115485.1|/1.49425e-168/PREDICTED: RING-H2 finger protein ATL47 [Brassica rapa]
A9S14	BrScaffold000006_574	(GCG)6	p3	18	TCGGATCGACACAATCTGAA	60.201	GGTTCAGTCCGAGCAGTCTC	59.993	164	Bra007083	A09	28725353	28727215	Bra007083	-	-	GO:0046983//protein dimerization activity	-	gi|685363821|ref|XP_009116138.1|/8.63177e-92/PREDICTED: basic leucine zipper 25 [Brassica rapa]
A9S15	BrScaffold000006_1529	(AAG)47	p3	141	GACGGAGAAATGATGGTTCC	59.341	TTTTCCGGTCAGATTCCAAC	59.91	259	Bra007453	A09	30794985	30797924	Bra007453	K10406|1|9e-95|349|tcc:TCM_032503|kinesin family member C2/C3	GO:0044464	-	GO:0023052//signaling	gi|685364908|ref|XP_009116611.1|/0/PREDICTED: receptor-like protein 12 [Brassica rapa]
A9S18	BrScaffold000074_504	(TG)15	p2	30	CCAAAAACAGTGCCAAAGGT	60.008	CCCTAATCCCCATCACACC	59.995	280	Bra031166	A09	33967937	33969805	Bra031166	K13249|1|4e-34|109|brp:103864251|translocon-associated protein subunit alpha	GO:0009534//chloroplast thylakoid;GO:0031090//organelle membrane	-	-	gi|674248960|gb|KFK41725.1|/2.16796e-33/hypothetical protein AALP_AA2G164800 [Arabis alpina]
A9S40	BrScaffold000074_61	(CT)11	p2	22	TGAAGAACGAACGAGGAACA	59.415	TTAAAATACATGGATGGAGCAA	57.235	245	Bra030996	A09	34766957	34770814	Bra030996	K08064|1|4e-122|204|brp:103842742|nuclear transcription factor Y, alpha	GO:0043231//intracellular membrane-bounded organelle	GO:0001071//nucleic acid binding transcription factor activity	-	gi|685367317|ref|XP_009117651.1|/2.0288e-121/PREDICTED: LOW QUALITY PROTEIN: nuclear transcription factor Y subunit A-8 [Brassica rapa]
A9S19	BrScaffold000053_534	(TCT)7gaattccctccctggtcttgctcttcttattcttcttt(TTC)5	c	74	TGGACAACACATTGCACAGA	59.705	CGCTTCACTAGGGAGCAGAT	59.598	260	Bra026908	A09	36000373	36001765	Bra026908	K11294|1|5e-06|46.2|brp:103871689|nucleolin	-	-	-	gi|685368116|ref|XP_009118007.1|/7.38255e-115/PREDICTED: uncharacterized protein LOC103843059 isoform X1 [Brassica rapa]
A9S20	BrScaffold000082_126	(TG)13	p2	26	CTTCTTACCGACTTGGGCTG	59.869	TTGTGACAAGCTGCAACACA	60.071	273	Bra032482	A09	38020446	38023513	Bra032482	K04532|1|6e-111|120|pop:POPTR_0014s15180g|amyloid beta precursor protein binding protein 1	GO:0043231//intracellular membrane-bounded organelle	GO:0005488;GO:0003824//catalytic activity	GO:0006259//DNA metabolic process;GO:0032446//protein modification by small protein conjugation;GO:0048878//chemical homeostasis;GO:0009887//organ morphogenesis;GO:0009755//hormone-mediated signaling pathway;GO:0006950//response to stress	gi|224128954|ref|XP_002320462.1|/3.26037e-110/auxin resistant 1 family protein [Populus trichocarpa]
A10S41	BrScaffold000018_1246	(TTC)5	p3	15	GGACCCTAGCGTTGACACAT	59.997	TTCTTCTACCCACTGGACCG	60.103	279	Bra015605	A10	209492	211108	Bra015605	K11108|1|2e-152|373|brp:103843917|RNA 3'-terminal phosphate cyclase-like protein	-	GO:0009975//cyclase activity	-	gi|685370311|ref|XP_009118938.1|/9.91635e-152/PREDICTED: probable RNA 3'-terminal phosphate cyclase-like protein [Brassica rapa]
A10S1	BrScaffold000018_1041	(AC)10	p2	20	TGGCTCTGGAGCTTTCACTT	60.134	TGGACAAGCTTAGGTGAGCA	59.591	183	Bra015525	A10	778232	783077	Bra015525	K16277|1|2e-78|295|brp:103844010|E3 ubiquitin-protein ligase DRIP [EC:2.3.2.27]	-	GO:0005488	GO:0016567//protein ubiquitination	gi|685336504|ref|XP_009105538.1|/2.75263e-137/PREDICTED: uncharacterized protein LOC103831393 [Brassica rapa]
A10S44	BrScaffold000018_929	(GAT)6	p3	18	GTCGGAGGAGGTGATTCAAA	60.05	GGAGACAGTTCGCTACGAGG	60.012	179	Bra015482	A10	1043378	1044868	Bra015482	-	GO:0009536//plastid	-	GO:0009725//response to hormone	gi|685370694|ref|XP_009119083.1|/7.82638e-161/PREDICTED: rho-N domain-containing protein 1, chloroplastic [Brassica rapa]
A10S2	BrScaffold000018_893	(TTC)7	p3	21	ATTCAACGACGGATTTGGAG	59.933	AGACGATTCGCGAAGGTAAA	59.845	257	Bra015467	A10	1121510	1123796	Bra015467	-	-	GO:0005488	-	gi|674884806|emb|CDY47708.1|/5.96343e-87/BnaA10g03970D [Brassica napus]
A10S22	BrScaffold000018_775	(CAT)7	p3	21	TGTTTTGGACCCCTGGTTTA	60.198	AGCTTGGAGATGGCAGCTTA	60.118	251	Bra015423	A10	1373100	1374498	Bra015423	-	-	-	-	gi|674885283|emb|CDY47287.1|/1.57361e-105/BnaA10g03590D [Brassica napus]
A10S46	BrScaffold000018_516	(AAG)7aggg(GAA)4	c	37	GGGTCACACAGGATGAACAA	59.367	GAAGAACATCTCCTCCAGCG	59.95	231	Bra015326	A10	1991024	1992184	Bra015326	K14484|1|2e-51|120|eus:EUTSA_v10008626mg|auxin-responsive protein IAA	-	GO:0005488	GO:0003002//regionalization;GO:0009790//embryo development;GO:0009725//response to hormone;GO:0048513//animal organ development	gi|567155579|ref|XP_006418118.1|/8.9098e-51/hypothetical protein EUTSA_v10008626mg [Eutrema salsugineum]
A10S47	BrScaffold000087_521	(TCT)5tcactatcctcctcatcatcactctcttcttcttcactg(CTA)4	c	66	CTGCACTCTCTATCTCGCCC	60.119	TTGCTGAGTCTGAGAGCGAA	60.008	195	Bra033408	A10	2469036	2475175	Bra033408	K14763|1|0.0|498|brp:103844497|H/ACA ribonucleoprotein complex non-core subunit NAF1	GO:0044464	GO:0008194//UDP-glycosyltransferase activity	GO:0005975//carbohydrate metabolic process	gi|685371750|ref|XP_009119534.1|/0/PREDICTED: H/ACA ribonucleoprotein complex non-core subunit NAF1-like [Brassica rapa]
A10S36	BrScaffold000087_454	(AG)9	p2	18	GGGTTTGGGCTAGACATTGA	59.933	AAGCATACGACGCGAGAGTT	60.044	215	Bra033381	A10	2607610	2614345	Bra033381	K16302|1|9e-91|227|brp:103844524|metal transporter CNNM	GO:0005667//transcription factor complex	-	GO:0034645//cellular macromolecule biosynthetic process;GO:0010467//gene expression;GO:0044238//primary metabolic process	gi|674914914|emb|CDY18163.1|/7.75011e-104/BnaC05g01860D [Brassica napus]
A10S4	BrScaffold000087_406	(AT)14	p2	28	GTGCAAGTCAGTGCCAAAGA	60.032	TTTCCATAGTTCCCATCCCA	60.126	230	Bra033362	A10	2718105	2720929	Bra033362	K03347|1|0.0|464|brp:103844544|cullin 1	GO:0043234//protein complex;GO:0015630//microtubule cytoskeleton;GO:0000228//nuclear chromosome;GO:0044444//cytoplasmic part	GO:0005488	GO:0009725//response to hormone;GO:0007623//circadian rhythm;GO:0043623//cellular protein complex assembly;GO:0007165//signal transduction;GO:0003006//developmental process involved in reproduction	gi|685371877|ref|XP_009119589.1|/0/PREDICTED: cullin-1-like [Brassica rapa]
A10S37	BrScaffold000087_315	(ATC)7	p3	21	TGGTGGAAAACGCAATGATA	59.93	CCGAAGAACAGAGCCGTTAC	59.875	273	Bra033322	A10	2932871	2933412	Bra033322	-	-	-	-	gi|685372005|ref|XP_009119639.1|/4.46342e-40/PREDICTED: uncharacterized protein LOC103844590 isoform X2 [Brassica rapa]
A10S48	BrScaffold000087_219	(ACA)6	p3	18	GATCCAAACCAGCCAAGTGT	59.973	CCCTTGGGAGACTTCTTTCC	60.045	111	Bra033291	A10	3104989	3107793	Bra033291	K12133|1|0.0|589|brp:103844616|MYB-related transcription factor LHY	-	GO:0001071//nucleic acid binding transcription factor activity;GO:0043565//sequence-specific DNA binding	GO:0010038//response to metal ion;GO:0009725//response to hormone;GO:0007623//circadian rhythm;GO:0006970//response to osmotic stress;GO:0043392//negative regulation of DNA binding;GO:0006351//transcription, DNA-templated;GO:0048571//long-day photoperiodism	gi|685372072|ref|XP_009119664.1|/0/PREDICTED: protein LHY [Brassica rapa]
A10S23	BrScaffold000087_32	(TA)12	p2	24	GCTGCAGATCATGGCTGTTA	59.979	TGCATTGGCAAAAGCTGATA	60.356	261	Bra033222	A10	3455615	3469442	Bra033222	K12604|1|0.0|263|eus:EUTSA_v10006521mg|CCR4-NOT transcription complex subunit 1	GO:0044464	-	-	gi|674863735|emb|CDY68431.1|/0/BnaCnng58980D [Brassica napus]
A10S24	BrScaffold000087_23	(GA)14	p2	28	GATCCATTAGGGGTGTGTGG	60.05	CATCGGGATCACAAACAACA	60.367	272	Bra033221	A10	3480530	3482147	Bra033221	K13415|1|3e-11|70.9|mdm:103401427|protein brassinosteroid insensitive 1 [EC:2.7.10.1 2.7.11.1]	GO:0043231//intracellular membrane-bounded organelle	-	GO:0009555//pollen development;GO:0003006//developmental process involved in reproduction;GO:0048236//plant-type spore development	gi|685372302|ref|XP_009119750.1|/1.03208e-137/PREDICTED: squamosa promoter-binding-like protein 8 [Brassica rapa]
A10S49	BrScaffold000061_227	(AGCA)5	p4	20	GCCCACAAAAATGCTGAAAT	59.945	TTCGCTTGATTAGCTGGAAA	58.651	156	Bra028297	A10	4774198	4775885	Bra028297	K16833|1|1e-29|80.5|aly:ARALYDRAFT_918263|protein phosphatase inhibitor 2	-	GO:0019212//phosphatase inhibitor activity	GO:0007165//signal transduction;GO:0010921//regulation of phosphatase activity	gi|674234065|gb|KFK26830.1|/3.62299e-32/hypothetical protein AALP_AA8G299300 [Arabis alpina]
A10S61	BrScaffold000002_3210	(CTT)5ggtatctccatcaactcctttctccttccttc(TCT)4	c	59	GTGACAGCTCCTTTCTTGGC	59.997	GAGCGGAGGAGAAGGAAGAT	59.919	179	Bra003034	A10	5933798	5935271	Bra003034	-	-	-	-	gi|674912918|emb|CDY20218.1|/7.70248e-39/BnaC09g30210D [Brassica napus]
A10S62	BrScaffold000002_3084	(AAC)4	p3	12	GCAAATTTTGGATTTGCAGG	60.436	TGGCTGTGATAGGTGACTCG	59.855	271	Bra003003	A10	6190441	6193735	Bra003003	-	GO:0031234//extrinsic component of cytoplasmic side of plasma membrane	-	GO:0023052//signaling	gi|685372901|ref|XP_009119955.1|/0/PREDICTED: WD repeat-containing protein 44 [Brassica rapa]
A10S25	BrScaffold000002_3077	(AT)10	p2	20	GACTTAGTCCGGCAGGTCAG	59.867	AGTGACTTCACACGATCGCA	60.473	193	Bra003001	A10	6203509	6208673	Bra003001	K05391|1|7e-85|280|bdi:100823258|cyclic nucleotide gated channel, other eukaryote	GO:0044464	GO:0015075//ion transmembrane transporter activity;GO:0005515//protein binding;GO:0000166//nucleotide binding	GO:0033554//cellular response to stress;GO:0006811//ion transport	gi|685372904|ref|XP_009119956.1|/2.20882e-128/PREDICTED: cyclic nucleotide-gated ion channel 4-like [Brassica rapa]
A10S6	BrScaffold000002_2889	(CT)59(TA)7	c	132	CACTGCCTCTTCTCCCTCAC	59.986	CCAAAAAGACCAAAACAAAGAA	58.322	240	Bra002956	A10	6550088	6555432	Bra002956	-	-	-	-	gi|685373045|ref|XP_009120007.1|/1.73099e-47/PREDICTED: uncharacterized protein LOC103844931 [Brassica rapa]
A10S64	BrScaffold000002_2803	(ATC)6	p3	18	CACGACTCCACAGATATATGCAA	60.032	GAGAAGACGTACGACCGAGC	60.02	260	Bra002929	A10	6743676	6744130	Bra002929	-	-	-	-	gi|685373162|ref|XP_009120037.1|/3.29512e-30/PREDICTED: uncharacterized protein LOC103844959 [Brassica rapa]
A10S39	BrScaffold000002_2659	(AGG)6	p3	18	GGTTTCTTCAGTCTGCGAGG	59.989	TAGCTCAACTCTAAGCCCGC	59.752	272	Bra002879	A10	7069286	7071367	Bra002879	K14398|1|4e-121|436|brp:103845018|cleavage and polyadenylation specificity factor subunit 6/7	-	GO:0005488	-	gi|685373351|ref|XP_009120094.1|/2.04816e-120/PREDICTED: cleavage and polyadenylation specificity factor subunit 6-like [Brassica rapa]
A10S7	BrScaffold000002_2639	(CTC)7	p3	21	TCCATCTTTGTGCCAATCAA	60.049	ATCACCCGGTAAATCCACTG	59.67	216	Bra002871	A10	7101900	7102230	Bra002871	K13456|1|8e-08|55.8|pvu:PHAVU_010G021200g|RPM1-interacting protein 4	GO:0016020//membrane	-	-	gi|685373371|ref|XP_009120102.1|/4.77422e-21/PREDICTED: uncharacterized protein LOC103845026 [Brassica rapa]
A10S66	BrScaffold000002_2572	(TGT)6	p3	18	AGATGGCCTGGAGACTCTGA	59.945	TTTGTTTGGTATGGCTGGAA	59.013	177	Bra002846	A10	7251112	7251819	Bra002846	-	-	-	-	gi|685373434|ref|XP_009120125.1|/1.60727e-112/PREDICTED: uncharacterized protein LOC103845048 [Brassica rapa]
A10S67	BrScaffold000002_2508	(CTG)5	p3	15	ATTAACCCACGTTGGAGCAG	59.993	GAAGTGAGTATCCGCGAAGC	59.985	236	Bra002828	A10	7373318	7375583	Bra002828	K18835|1|8e-165|438|brp:103845067|WRKY transcription factor 2	-	-	GO:0006351//transcription, DNA-templated	gi|685373499|ref|XP_009120143.1|/0/PREDICTED: probable WRKY transcription factor 2 [Brassica rapa]
A10S68	BrScaffold000002_2390	(TTGT)3	p4	12	AAGGGTTTAAGATGGACGGG	60.18	TTGCCAAACTGACCATCAGA	60.24	210	Bra002785	A10	7663378	7666337	Bra002785	-	-	GO:0046914//transition metal ion binding	-	gi|685373672|ref|XP_009120199.1|/2.59261e-137/PREDICTED: zinc finger CCCH domain-containing protein 64 isoform X1 [Brassica rapa]
A10S51	BrScaffold000002_2084	(GCT)5	p3	15	TAATCAGCTGCTCCAGCTCC	60.646	TCGCTTCTTCCTCAGGTTTC	59.55	270	Bra002703	A10	8213129	8216236	Bra002703	K03695|1|5e-62|240|mus:103984343|ATP-dependent Clp protease ATP-binding subunit ClpB	-	-	GO:0009628//response to abiotic stimulus	gi|685373957|ref|XP_009120288.1|/0/PREDICTED: chaperone protein ClpB1 isoform X2 [Brassica rapa]
A10S8	BrScaffold000002_1878	(GAA)5gacggagagaagaagacaatgaaggagtttatagatcttgaatcaagaactcgccaaatcaagaagagcaacgacaaagagc(CCT)4	c	109	AAGACGAGAGGCTAGGGAGC	60.117	TTTTGGGAGTTCTTGGGATG	59.903	268	Bra002608	A10	8641700	8643232	Bra002608	-	-	-	-	gi|685374300|ref|XP_009120400.1|/0/PREDICTED: UPF0503 protein At3g09070, chloroplastic [Brassica rapa]
A10S40	BrScaffold000002_1726	(GGA)6	p3	18	GGGGCGAAGTGAGTTGATTA	60.074	TCCATCGAACAAGAGAACCC	60.05	140	Bra002552	A10	8966734	8967330		-	-	GO:0003723//RNA binding	-	gi|2067594160|emb|CAG7910515.1|//PREDICTED: putative pumilio homolog 20 [Brassica rapa]
A10S9	BrScaffold000002_1624	(TCT)11tccacttcctca(TCT)5tccacttcc(TCT)6tccacttcctca(TCT)5tccacttcctca(TCT)11	c	159	GCAGTCGTCCACTTCCTCAT	60.269	CCAGATGGTAATATTTCCCTTCTAAA	59.998	280	Bra002502	A10	9253661	9256982	Bra002502	K11968|1|2e-76|288|mdm:103406370|ariadne-1 [EC:2.3.2.27];K11975|5|2e-74|281|aly:ARALYDRAFT_484938|E3 ubiquitin-protein ligase RNF144 [EC:2.3.2.27]	-	GO:0046914//transition metal ion binding	-	gi|685374695|ref|XP_009120546.1|/1.15045e-155/PREDICTED: uncharacterized protein LOC103845438, partial [Brassica rapa]
A10S10	BrScaffold000002_1387	(GAT)6	p3	18	AACTGAAATGGGTTTGGCTG	59.971	CACGAAGCAAAAGACAACGA	60.027	240	Bra002424	A10	9720823	9724635	Bra002424	-	GO:0009526//plastid envelope;GO:0009534//chloroplast thylakoid	-	GO:0007275//multicellular organism development;GO:0003006//developmental process involved in reproduction;GO:0009657//plastid organization	gi|685374958|ref|XP_009120639.1|/0/PREDICTED: uncharacterized protein LOC103845523 [Brassica rapa]
A10S11	BrScaffold000002_964	(AC)8	p2	16	TGATGTACTCTGGTCGCTGC	60.016	ATTCAGTGTCTCGCGAATCC	60.226	256	Bra002273	A10	10623048	10624208	Bra002273	K15153|1|9e-43|159|brp:103845710|mediator of RNA polymerase II transcription subunit 31	-	-	-	gi|685375595|ref|XP_009120846.1|/4.94027e-42/PREDICTED: mediator of RNA polymerase II transcription subunit 31 [Brassica rapa]
A10S53	BrScaffold000002_866	(CT)6	p2	12	AAAGCAAGGAGGAGGAGGAG	59.95	ACAAGCGTACCTCGTCGATT	59.763	278	Bra002225	A10	10850291	10852522	Bra002225	K09142|1|6e-64|119|brp:103845766|uncharacterized protein	-	-	-	gi|685375754|ref|XP_009120901.1|/3.52233e-63/PREDICTED: uncharacterized protein C9orf114 homolog [Brassica rapa]
A10S12	BrScaffold000002_796	(AG)6t(GA)14	c	41	CTGACCCCACTACTTTCCCA	59.959	CAGAGATGAGAGACCGCACA	60.138	205	Bra002201	A10	11001328	11003790	Bra002201	K04371|1|0.0|345|jcu:105631897|mitogen-activated protein kinase 1/3 [EC:2.7.11.24]	GO:0043231//intracellular membrane-bounded organelle;GO:0016020//membrane	GO:0004702//receptor signaling protein serine/threonine kinase activity;GO:0032559	GO:0006464//cellular protein modification process;GO:0023052//signaling	gi|674941052|emb|CDX92566.1|/0/BnaA10g16050D [Brassica napus]
A10S13	BrScaffold000002_622	(AAG)9	p3	27	TGACACCGAGCTTGAAGATG	59.984	AAACGTGAGAGATGCGAGGT	59.874	265	Bra002137	A10	11374296	11375849	Bra002137	-	-	-	-	gi|685376062|ref|XP_009121006.1|/6.19599e-99/PREDICTED: dnaJ homolog subfamily C member 18 [Brassica rapa]
A10S54	BrScaffold000008_88	(TATC)5	p4	20	TCTGCGGTTCAGATCCTTTC	60.34	GGTAGATGCCAGCCATTGAT	59.923	219	Bra008600	A10	11804033	11806844	Bra008600	K12811|1|9e-33|143|brp:103874839|ATP-dependent RNA helicase DDX46/PRP5 [EC:3.6.4.13];K12472|2|8e-08|60.5|ota:Ot15g00490|epidermal growth factor receptor substrate 15;K06669|4|9e-06|53.5|cam:101502088|structural maintenance of chromosome 3 (chondroitin sulfate proteoglycan 6)	-	-	-	gi|685377085|ref|XP_009121455.1|/0/PREDICTED: WEB family protein At5g16730, chloroplastic [Brassica rapa]
A10S27	BrScaffold000008_144	(AT)8	p2	16	TTGTCAATGTTCGTTCAAAACTT	58.71	AAATAAATTAAACAACCACAATAACCA	58.381	249	Bra008613	A10	11896006	11900956	Bra008613	-	GO:0043231//intracellular membrane-bounded organelle	-	GO:0001708//cell fate specification;GO:0009943//adaxial/abaxial axis specification;GO:0009653//anatomical structure morphogenesis;GO:0048437//floral organ development	gi|685377129|ref|XP_009121475.1|/1.29202e-119/PREDICTED: transcription repressor KAN1-like [Brassica rapa]
A10S14	BrScaffold000008_398	(AG)10a(AAGTG)3	c	36	ATCGTCCAAACCCATCTCAC	59.786	GCTTTTGCTTTGATCCGTTC	59.829	186	Bra008726	A10	12388033	12398424	Bra008726	K13024|1|1e-117|286|brp:103846446|inositol-hexakisphosphate/diphosphoinositol-pentakisphosphate 1-kinase [EC:2.7.4.24]	GO:0016020//membrane	GO:0004672//protein kinase activity;GO:0000166//nucleotide binding	GO:0008152//metabolic process	gi|674873894|emb|CDY59664.1|/4.48344e-119/BnaCnng35380D [Brassica napus]
A10S28	BrScaffold000008_463	(TC)7	p2	14	CTTGATCCCATGCTACGGTT	59.955	AATGATCGGAGCAAATGAGG	60.036	243	Bra008758	A10	12536788	12538788	Bra008758	K16280|1|0.0|273|brp:103846485|E3 ubiquitin-protein ligase RGLG [EC:2.3.2.27]	GO:0016020//membrane	GO:0046872//metal ion binding	GO:0042445//hormone metabolic process;GO:0006725//cellular aromatic compound metabolic process;GO:0032446//protein modification by small protein conjugation	gi|685377609|ref|XP_009121662.1|/0/PREDICTED: E3 ubiquitin-protein ligase RGLG2-like [Brassica rapa]
A10S15	BrScaffold000008_556	(TCA)10	p3	30	CACGATGTGGAAGCGAAGTA	59.864	TCTACTGCATCACCGGAACA	60.263	158	Bra008803	A10	12702662	12703366	Bra008803	K00670|1|2e-95|348|brp:103846541|peptide alpha-N-acetyltransferase [EC:2.3.1.88]	-	GO:0008080//N-acetyltransferase activity	-	gi|685377782|ref|XP_009121729.1|/1.14669e-94/PREDICTED: N-terminal acetyltransferase A complex catalytic subunit ard1-like [Brassica rapa]
A10S55	BrScaffold000008_600	(GTA)6	p3	18	TAAGCATCTCATCCCGGTTC	60.036	CTGCGTTCCAGTACCCTCTC	59.867	216	Bra008826	A10	12802553	12803848	Bra008826	K05863|1|0.0|290|brp:103846570|solute carrier family 25 (mitochondrial adenine nucleotide translocator), member 4/5/6/31	GO:0031224//intrinsic component of membrane;GO:0030312//external encapsulating structure;GO:0031981//nuclear lumen;GO:0019866//organelle inner membrane;GO:0009526//plastid envelope	GO:0046914//transition metal ion binding	GO:0006862//nucleotide transport	gi|685377861|ref|XP_009121762.1|/0/PREDICTED: ADP,ATP carrier protein 1, mitochondrial-like [Brassica rapa]
A10S16	BrScaffold000008_971	(TGA)5agag(GAT)7	c	40	GGATGATCCATTTGAGGCAC	60.289	TCTTCAGCTTCACCGGTCTT	59.989	266	Bra008975	A10	13500002	13501321	Bra008975	-	GO:0043231//intracellular membrane-bounded organelle	-	GO:0006952//defense response;GO:0009725//response to hormone;GO:0007165//signal transduction	gi|685378378|ref|XP_009121970.1|/3.28919e-77/PREDICTED: 46 kDa FK506-binding nuclear protein [Brassica rapa]
A10S56	BrScaffold000008_1075	(ATG)5(TGATGG)4*	c*	34	CTCCTGGGGAGGATCCTAAG	60.023	GGTCTCACCACAGCATTGAA	59.682	244	Bra009023	A10	13702916	13705971	Bra009023	K15920|1|1e-139|446|mus:103985427|beta-D-xylosidase 4 [EC:3.2.1.37]	GO:0031090//organelle membrane;GO:0043231//intracellular membrane-bounded organelle	GO:0004553//hydrolase activity, hydrolyzing O-glycosyl compounds	GO:0044238//primary metabolic process	gi|685378556|ref|XP_009122041.1|/0/PREDICTED: probable beta-D-xylosidase 6 [Brassica rapa]
A10S29	BrScaffold000008_1820	(AT)16	p2	32	GCATTGAAGAAGAAGCGGAC	59.962	TCGCTTTAATCGCACTGTTG	60.014	266	Bra009373	A10	14091683	14093131	Bra009373	K12195|1|3e-35|101|brp:103847195|charged multivesicular body protein 6	GO:0010008//endosome membrane	-	GO:0006810//transport	gi|674963684|emb|CDX69916.1|/1.96656e-34/BnaA10g22650D [Brassica napus]
A10S30	BrScaffold000008_1809	(CAC)6	p3	18	AGTTTCAGCTGGGGATTTGA	59.67	CCTCTTCTGTCGGATTCTGC	59.95	189	Bra009367	A10	14116603	14117857	Bra009367	K15407|1|1e-08|61.6|smo:SELMODRAFT_417998|queuine tRNA-ribosyltransferase subunit QTRTD1 [EC:2.4.2.29]	-	GO:0046914//transition metal ion binding	-	gi|685379570|ref|XP_009122494.1|/1.59955e-179/PREDICTED: uncharacterized protein LOC103847187 [Brassica rapa]
A10S19	BrScaffold000008_1292	(GA)14	p2	28	GTTCGCCAAGAAACTTCTGC	60	TCGAAGGTATCCCGTAGTGG	59.948	240	Bra009120	A10	15163928	15170138	Bra009120	K08518|1|0.0|267|brp:103846904|syntaxin-binding protein 5	GO:0016020//membrane	-	GO:0009987//cellular process	gi|685378831|ref|XP_009122161.1|/0/PREDICTED: uncharacterized protein LOC103846904 [Brassica rapa]
A10S32	BrScaffold000008_1908	(TTG)6	p3	18	CGAACCTGTCCTTGGACCTA	60.103	GCAGGACAAGCTCATAAGGG	59.836	253	Bra009426	A10	15405062	15406609	Bra009426	-	-	-	-	gi|685379738|ref|XP_009122562.1|/4.43027e-90/PREDICTED: transcription factor RF2a [Brassica rapa]
A10S59	BrScaffold000008_2045	(TGT)5	p3	15	GGAAGTGAAGATTCCGGTGA	60.05	CGGATTCTTGCCATAGTGGT	59.955	170	Bra009477	A10	15662803	15663774	Bra009477	K14848|1|5e-25|115|sita:101766449|ribosome assembly protein RRB1	GO:0005576//extracellular region	GO:0008135//translation factor activity, RNA binding;GO:0004175//endopeptidase activity;GO:0046914//transition metal ion binding	GO:0006351//transcription, DNA-templated;GO:0006412//translation	gi|685379897|ref|XP_009122627.1|/0/PREDICTED: metacaspase-9 [Brassica rapa]
A10S20	BrScaffold000008_2172	(AG)11	p2	22	AGATTGATTCCCAGCGAAGA	59.773	CGATCTCTCAACTCCACCGT	60.261	272	Bra009521	A10	15872209	15877661	Bra009521	K00700|1|0.0|170|brp:103847372|1,4-alpha-glucan branching enzyme [EC:2.4.1.18]	GO:0009536//plastid	GO:0016758//transferase activity, transferring hexosyl groups	GO:0009250//glucan biosynthetic process	gi|685380020|ref|XP_009122687.1|/0/PREDICTED: 1,4-alpha-glucan-branching enzyme 2-2, chloroplastic/amyloplastic isoform X1 [Brassica rapa]
A10S34	BrScaffold000008_2299	(AGC)6	p3	18	AACACAGCACGCCTTTCTCT	60.058	AGCAATGCAAGAACTGGAGG	60.397	152	Bra009586	A10	16135525	16137297	Bra009586	K04683|1|1e-16|81.3|vvi:100240899|transcription factor Dp-1	GO:0043231//intracellular membrane-bounded organelle	GO:0005488;GO:0001071//nucleic acid binding transcription factor activity	GO:0006351//transcription, DNA-templated	gi|685380195|ref|XP_009122777.1|/2.74217e-37/PREDICTED: transcription factor-like protein DPA [Brassica rapa]
A10S60	BrScaffold000008_2350	(GAA)5	p3	15	ACATTGCTCGGTGATGATGA	60.08	AGTGACACGTCGTGATTCCA	60.162	181	Bra009609	A10	16238673	16239295	Bra009609	-	GO:0009534//chloroplast thylakoid	GO:0005515//protein binding	GO:0044267//cellular protein metabolic process	gi|685380248|ref|XP_009122802.1|/2.07093e-19/PREDICTED: uncharacterized protein LOC103847473 [Brassica rapa]
A10S35	BrScaffold000008_2386	(GGA)6	p3	18	AAAAAGCCGTGGGAAATTCT	59.945	ATGGAAGCCCTCTCAATCCT	60.037	198	Bra009625	A10	16298892	16299214	Bra009625	-	-	-	-	gi|674922874|emb|CDY10479.1|/2.96923e-24/BnaCnng03800D [Brassica napus]
Note: Markers in red are ones used for mapping construction
