# Supplementary material
Source: MDPI journal article supplement (https://www.mdpi.com/2311-7524/8/2/165)
Supplement: s1 [file s1 › Table S2.xlsx]

## Sheet: Sheet1
Table s2 Gene information for QTLs with the interval size ≤10 cM
Trait	QTL name	Chro.	Flanking markers	Marker interval (cM)	Region size (cM)	Physical interval（bp）	Bra_id	Chromosome	Start	Stop	Strand	NR Description
NNL	qNNL-1	A02	A2S38-A2S58	137.79-147.42	9.63	19786087-23330794	Bra026630	A02	19832309	19834060	+	PREDICTED: probable xyloglucan endotransglucosylase..hydrolase protein 27 [Brassica rapa]
							Bra026629	A02	19834619	19835720	+	BnaA02g26010D [Brassica napus]
							Bra026628	A02	19838042	19839196	+	replication protein A 70 kDa DNA-binding subunit C-like [Brassica napus]
							Bra026627	A02	19847723	19852615	-	PREDICTED: purple acid phosphatase 7-like [Brassica rapa]
							Bra026626	A02	19871141	19874083	+	BnaA02g26080D [Brassica napus]
							Bra026625	A02	19886326	19889914	+	BnaC02g34170D [Brassica napus]
							Bra026624	A02	19896731	19899540	+	PREDICTED: protein SHOOT GRAVITROPISM 5 isoform X2 [Brassica rapa]
							Bra026623	A02	19914814	19917193	-	transmembrane 9 superfamily member 3 [Brassica napus]
							Bra026622	A02	19920533	19921797	-	uncharacterized protein BNAA02G26130D [Brassica napus]
							Bra026621	A02	19936666	19939088	-	PREDICTED: glutamate decarboxylase 4-like [Raphanus sativus]
							Bra026620	A02	19948127	19950445	+	PREDICTED: protein NRT1.. PTR FAMILY 8.4-like [Raphanus sativus]
							Bra026619	A02	19953753	19954025	+	PREDICTED: NADH dehydrogenase [ubiquinone] 1 beta subcomplex subunit 7-like [Brassica rapa]
							Bra026618	A02	19977133	19979163	+	PREDICTED: putative Myb family transcription factor At1g14600 [Brassica rapa]
							Bra026617	A02	19992352	20001272	+	PREDICTED: protein indeterminate-domain 5, chloroplastic-like [Brassica rapa]
							Bra026616	A02	20030179	20037968	-	PREDICTED: protein indeterminate-domain 4, chloroplastic-like [Brassica rapa]
							Bra026615	A02	20056289	20056818	+	defensin-like protein 1 [Brassica napus]
							Bra026613	A02	20074117	20076232	-	PREDICTED: zinc finger CCCH domain-containing protein 17 [Brassica rapa]
							Bra026612	A02	20077087	20079054	-	PREDICTED: uncharacterized protein LOC103854014 isoform X1 [Brassica rapa]
							Bra026611	A02	20084364	20086353	+	PREDICTED: tobamovirus multiplication protein 3 [Brassica rapa]
							Bra026610	A02	20088846	20091677	-	PREDICTED: phytosulfokine receptor 1 [Brassica rapa]
							Bra026609	A02	20096002	20097145	-	F-box protein PP2-B1-like [Brassica napus]
							Bra026608	A02	20110737	20112151	-	PREDICTED: F-box protein At2g02240-like [Brassica rapa]
							Bra026607	A02	20119105	20122616	+	PREDICTED: probable ATP-dependent DNA helicase DDX11 isoform X1 [Brassica rapa]
							Bra026606	A02	20125556	20128837	-	PREDICTED: putative F-box protein PP2-B2 [Brassica rapa]
							Bra026605	A02	20131178	20132211	-	PREDICTED: F-box protein At2g02240-like [Brassica rapa]
							Bra026604	A02	20132791	20140056	-	PREDICTED: putative F-box protein PP2-B6 isoform X2 [Brassica rapa]
							Bra026603	A02	20141036	20142387	-	PREDICTED: F-box protein PP2-B10-like [Brassica rapa]
							Bra026602	A02	20143543	20144749	+	PREDICTED: uncharacterized protein LOC103854005 [Brassica rapa]
							Bra026601	A02	20150189	20152669	+	PREDICTED: glutathione S-transferase Z1 [Brassica rapa]
							Bra026600	A02	20155558	20157094	-	PREDICTED: cinnamoyl-CoA reductase 1 [Brassica rapa]
							Bra026598	A02	20165163	20165459	+	PREDICTED: auxin-responsive protein SAUR21-like [Brassica rapa]
							Bra026597	A02	20166609	20166899	-	PREDICTED: auxin-responsive protein SAUR21-like [Brassica rapa]
							Bra026596	A02	20167655	20169631	+	PREDICTED: auxin-responsive protein SAUR20-like [Raphanus sativus]
							Bra026595	A02	20185554	20188083	+	PREDICTED: NAC domain-containing protein 35 isoform X1 [Brassica rapa]
							Bra026594	A02	20198437	20200256	-	--
							Bra026592	A02	20229339	20232244	+	PREDICTED: protein STICHEL-like [Brassica rapa]
							Bra026591	A02	20233925	20235644	-	PREDICTED: 2-C-methyl-D-erythritol 4-phosphate cytidylyltransferase, chloroplastic [Brassica rapa]
							Bra026590	A02	20236102	20236320	+	hypothetical protein AXX17_AT2G01510 [Arabidopsis thaliana]
							Bra026589	A02	20257231	20258133	+	PREDICTED: zinc-finger homeodomain protein 3 [Brassica rapa]
							Bra026588	A02	20259608	20260223	+	BnaA02g26490D [Brassica napus]
							Bra026587	A02	20264007	20265158	+	PREDICTED: F-box protein At1g11270-like [Brassica rapa]
							Bra026586	A02	20276426	20283261	+	PREDICTED: cullin-associated NEDD8-dissociated protein 1 isoform X1 [Tarenaya hassleriana]
							Bra026585	A02	20288337	20290320	-	PREDICTED: survival of motor neuron-related-splicing factor 30 isoform X1 [Brassica rapa]
							Bra026584	A02	20292810	20295156	+	PREDICTED: uncharacterized protein LOC103853984 [Brassica rapa]
							Bra026583	A02	20307055	20309169	+	hypothetical protein AALP_AA5G015800 [Arabis alpina]
							Bra026581	A02	20319023	20321149	+	PREDICTED: protein IQ-DOMAIN 31-like [Brassica rapa]
							Bra026580	A02	20321867	20324008	-	PREDICTED: protein kinase 2B, chloroplastic isoform X1 [Brassica rapa]
							Bra026579	A02	20328502	20330470	+	PREDICTED: UDP-galactose..UDP-glucose transporter 1 [Brassica rapa]
							Bra026578	A02	20331823	20334081	-	PREDICTED: myb-related protein B [Brassica rapa]
							Bra026577	A02	20355911	20357013	-	basic blue protein [Brassica napus]
							Bra026576	A02	20357852	20361366	-	PREDICTED: sucrose transport protein SUC3-like isoform X1 [Brassica rapa]
							Bra026575	A02	20366286	20367620	+	PREDICTED: F-box..kelch-repeat protein SKIP11-like [Brassica rapa]
							Bra026574	A02	20369515	20371450	+	PREDICTED: uncharacterized protein LOC103853971 [Brassica rapa]
							Bra026573	A02	20377192	20379560	-	uncharacterized protein LOC106438187 [Brassica napus]
							Bra026572	A02	20382524	20383771	-	PREDICTED: protein PHYTOCHROME KINASE SUBSTRATE 1-like [Brassica rapa]
							Bra026571	A02	20387671	20389494	+	pentatricopeptide repeat-containing protein At2g02980, chloroplastic-like isoform X2 [Brassica napus]
							Bra026570	A02	20391492	20392500	+	PREDICTED: ribonuclease 1 [Brassica rapa]
							Bra026569	A02	20400046	20401012	-	expansin-A15 isoform X2 [Brassica napus]
							Bra026567	A02	20419443	20421714	+	PREDICTED: signal peptide peptidase-like [Brassica rapa]
							Bra026566	A02	20423766	20425707	+	cell division cycle and apoptosis regulator protein 1-like, partial [Brassica napus]
							Bra026565	A02	20426327	20429827	-	phosphate transporter PHO1 homolog 5 isoform X4 [Brassica napus]
							Bra026563	A02	20464477	20464740	-	PREDICTED: putative F-box protein At2g02030 [Brassica oleracea var. oleracea]
							Bra026562	A02	20481444	20488060	-	PREDICTED: DNA polymerase alpha catalytic subunit-like [Brassica rapa]
							Bra026561	A02	20494007	20496190	+	PREDICTED: subtilisin-like protease SBT1.9 [Brassica rapa]
							Bra026560	A02	20501057	20501489	-	BnaAnng31130D [Brassica napus]
							Bra026559	A02	20507293	20508392	+	PREDICTED: transmembrane emp24 domain-containing protein p24delta8-like [Brassica rapa]
							Bra026558	A02	20510070	20510630	-	PREDICTED: protein PHLOEM PROTEIN 2-LIKE A5-like [Brassica rapa]
							Bra026557	A02	20517446	20518458	+	PREDICTED: uncharacterized protein LOC108813411 [Raphanus sativus]
							Bra026556	A02	20525858	20529292	-	PREDICTED: protein PHLOEM PROTEIN 2-LIKE A8-like [Brassica rapa]
							Bra026555	A02	20541131	20541992	-	protein PHLOEM PROTEIN 2-LIKE A5-like [Brassica napus]
							Bra026554	A02	20545251	20547158	-	WRKY transcription factor 3 [Brassica rapa]
							Bra026553	A02	20560309	20561406	-	PREDICTED: uncharacterized protein At5g01610-like [Brassica rapa]
							Bra026552	A02	20563326	20564140	-	PREDICTED: uncharacterized protein LOC103853946 isoform X1 [Brassica rapa]
							Bra026551	A02	20564579	20565082	-	PREDICTED: nodulin-related protein 1-like [Brassica rapa]
							Bra026550	A02	20566089	20568017	+	PREDICTED: probable inactive purple acid phosphatase 9 [Brassica rapa]
							Bra026549	A02	20572287	20574924	+	PREDICTED: probable methyltransferase PMT5 [Brassica rapa]
							Bra026548	A02	20582253	20584299	+	PREDICTED: myb family transcription factor EFM-like [Brassica rapa]
							Bra026547	A02	20589343	20590917	+	PREDICTED: ureide permease 1 isoform X1 [Brassica rapa]
							Bra026546	A02	20591682	20592566	+	PREDICTED: UDP-glycosyltransferase 73B3-like [Brassica rapa]
							Bra026545	A02	20594757	20595169	+	PREDICTED: protein SPIRAL1-like [Brassica rapa]
							Bra026544	A02	20595459	20596220	-	PREDICTED: ubiquinone biosynthesis protein COQ4 homolog, mitochondrial-like [Brassica rapa]
							Bra026543	A02	20607728	20609823	+	PREDICTED: agamous-like MADS-box protein AGL3 [Brassica oleracea var. oleracea]
							Bra026541	A02	20622486	20623417	-	PREDICTED: protein COLD-REGULATED 15B, chloroplastic-like isoform X2 [Brassica rapa]
							Bra026540	A02	20628890	20629846	-	BnaA02g27270D [Brassica napus]
							Bra026536	A02	20676730	20677296	-	PREDICTED: cytosolic sulfotransferase 12-like [Brassica rapa]
							Bra026535	A02	20682920	20683969	-	PREDICTED: cytosolic sulfotransferase 12-like isoform X2 [Brassica rapa]
							Bra026534	A02	20687210	20688152	+	--
							Bra026533	A02	20693830	20701289	+	D-aminoacyl-tRNA deacylase-like [Brassica napus]
							Bra026532	A02	20708407	20709192	+	PREDICTED: probable root meristem growth factor 8 [Brassica rapa]
							Bra026531	A02	20712622	20713424	+	BnaA02g27350D [Brassica napus]
							Bra026530	A02	20719032	20720285	-	PREDICTED: putative F-box protein At2g02030 [Brassica oleracea var. oleracea]
							Bra026529	A02	20726583	20728679	+	BnaA02g27380D [Brassica napus]
							Bra026528	A02	20735902	20738483	+	BnaA02g27390D [Brassica napus]
							Bra026526	A02	20741050	20742211	-	PREDICTED: root meristem growth factor 3 [Brassica rapa]
							Bra026525	A02	20749527	20754583	+	hypothetical protein B456_005G148100 [Gossypium raimondii]
							Bra026524	A02	20787645	20788013	+	BnaA02g27420D [Brassica napus]
							Bra026523	A02	20818524	20818793	+	BnaA02g27460D [Brassica napus]
							Bra026522	A02	20825900	20827629	+	PREDICTED: LAG1 longevity assurance homolog 1 [Brassica rapa]
							Bra026521	A02	20833399	20834205	+	PREDICTED: uncharacterized protein LOC103853904 [Brassica rapa]
							Bra026520	A02	20834669	20840974	-	PREDICTED: uncharacterized protein LOC106314145 [Brassica oleracea var. oleracea]
							Bra026519	A02	20855886	20858091	+	PREDICTED: choline..ethanolaminephosphotransferase 2-like [Brassica rapa]
							Bra026518	A02	20863308	20865155	+	PREDICTED: uncharacterized protein LOC103853900 [Brassica rapa]
							Bra026516	A02	20875011	20875460	+	PREDICTED: uncharacterized protein LOC103853898 [Brassica rapa]
							Bra026515	A02	20878098	20883250	-	hypothetical protein ARALYDRAFT_322706 [Arabidopsis lyrata subsp. lyrata]
							Bra026514	A02	20891473	20894469	-	PREDICTED: ABC transporter G family member 21-like [Brassica rapa]
							Bra026513	A02	20928206	20929003	+	PREDICTED: protein MIZU-KUSSEI 1-like [Brassica oleracea var. oleracea]
							Bra026512	A02	20944565	20945567	-	BnaA02g27590D [Brassica napus]
							Bra026511	A02	20947552	20948907	+	PREDICTED: aspartyl protease family protein 2-like [Brassica rapa]
							Bra026510	A02	20970558	20971978	+	PREDICTED: transcription factor AIG1-like [Brassica rapa]
							Bra026509	A02	20996782	20997762	+	PREDICTED: AP2..ERF and B3 domain-containing transcription factor ARF14-like [Brassica rapa]
							Bra026508	A02	20998808	21001703	-	cytochrome P450 705A22 [Brassica napus]
							Bra036376	A02	21018835	21022491	-	uncharacterized protein LOC111208635 [Brassica napus]
							Bra036375	A02	21024100	21024351	-	--
							Bra036374	A02	21025078	21025863	+	uncharacterized protein LOC106350762 [Brassica napus]
							Bra036370	A02	21080677	21081758	+	PREDICTED: uncharacterized protein At3g60930, chloroplastic-like [Brassica oleracea var. oleracea]
							Bra036369	A02	21094292	21096272	+	PREDICTED: uncharacterized protein LOC106297537 [Brassica oleracea var. oleracea]
							Bra036368	A02	21127202	21129550	-	BnaA06g20510D [Brassica napus]
							Bra036367	A02	21132689	21139201	+	uncharacterized protein LOC106394127 [Brassica napus]
							Bra036365	A02	21150732	21152040	+	peroxiredoxin Q, chloroplastic isoform X2 [Brassica napus]
							Bra036363	A02	21185632	21186096	-	PREDICTED: uncharacterized protein LOC103854401 [Brassica rapa]
							Bra036362	A02	21186838	21187188	-	PREDICTED: protein NIM1-INTERACTING 2-like [Brassica rapa]
							Bra036360	A02	21201771	21202616	+	PREDICTED: ethylene-responsive transcription factor ERF119-like isoform X2 [Brassica rapa]
							Bra036359	A02	21207608	21207850	-	CLAVATA3..ESR ..CLE..-related protein 27 [Brassica napus]
							Bra036357	A02	21229045	21232810	+	PREDICTED: uncharacterized protein LOC103854395 [Brassica rapa]
							Bra036356	A02	21233655	21235280	-	PREDICTED: uncharacterized protein LOC103854394 [Brassica rapa]
							Bra036355	A02	21239712	21241640	-	PREDICTED: putative pentatricopeptide repeat-containing protein At3g25970 [Brassica rapa]
							Bra036354	A02	21242691	21244376	-	PREDICTED: trihelix transcription factor GT-4 [Brassica rapa]
							Bra036353	A02	21245927	21247184	-	PREDICTED: F-box protein SKIP14-like [Brassica rapa]
							Bra036352	A02	21257834	21260012	+	PREDICTED: serine..threonine protein phosphatase 2A 59 kDa regulatory subunit B' eta isoform-like [Brassica rapa]
							Bra036350	A02	21265413	21267887	+	PREDICTED: LOW QUALITY PROTEIN: protein WVD2-like 7 [Brassica rapa]
							Bra036349	A02	21278310	21280601	+	BnaA02g27780D [Brassica napus]
							Bra036348	A02	21283896	21284252	+	anther-specific protein BCP1 [Brassica napus]
							Bra036347	A02	21288181	21290784	+	PREDICTED: protein terminal ear1 homolog [Camelina sativa]
							Bra036340	A02	21408274	21410045	+	BnaAnng02000D [Brassica napus]
							Bra036339	A02	21436524	21441235	+	PREDICTED: uncharacterized protein LOC103854373 [Brassica rapa]
							Bra036337	A02	21483103	21484229	-	PREDICTED: uncharacterized protein LOC103854371 isoform X1 [Brassica rapa]
							Bra036336	A02	21532949	21534898	-	BnaA10g28200D [Brassica napus]
							Bra036335	A02	21562529	21562970	+	PREDICTED: thioredoxin H5-like [Brassica rapa]
							Bra036334	A02	21563132	21566945	-	PREDICTED: beta-galactosidase 5 [Theobroma cacao]
							Bra036333	A02	21582495	21584222	-	hypothetical protein CARUB_v10009636mg [Capsella rubella]
							Bra036332	A02	21594894	21596456	-	PREDICTED: LOW QUALITY PROTEIN: ubiquitin-conjugating enzyme 15 [Brassica rapa]
							Bra036331	A02	21600378	21600971	-	BnaA10g28240D [Brassica napus]
							Bra036330	A02	21607768	21609307	-	PREDICTED: peroxidase 9 [Brassica rapa]
							Bra036329	A02	21610076	21611227	-	uncharacterized protein LOC111207236 [Brassica napus]
							Bra032926	A02	21626346	21627544	+	dihomomethionine N-hydroxylase-like isoform X2 [Brassica napus]
							Bra032928	A02	21644227	21646099	+	cytochrome P450 71B9-like [Brassica napus]
							Bra032929	A02	21646635	21647711	-	PREDICTED: uncharacterized protein LOC103854321 [Brassica rapa]
							Bra032930	A02	21649026	21649340	-	BnaA02g28030D [Brassica napus]
							Bra032931	A02	21650727	21655769	+	PREDICTED: probable alpha-galactosidase B isoform X2 [Brassica rapa]
							Bra032932	A02	21656599	21658318	-	PREDICTED: tRNA ..guanine..10..-N2..-methyltransferase homolog [Camelina sativa]
							Bra032933	A02	21658715	21659586	+	BnaA02g28060D [Brassica napus]
							Bra032934	A02	21660310	21661922	+	BnaA02g28070D [Brassica napus]
							Bra032935	A02	21662079	21663670	-	plant intracellular Ras-group-related LRR protein 2-like [Brassica napus]
							Bra032936	A02	21665848	21666487	-	PREDICTED: uncharacterized protein LOC103854316 [Brassica rapa]
							Bra032937	A02	21684584	21685852	-	aquaporin TIP1-2 [Capsella rubella]
							Bra032938	A02	21690732	21697188	+	transcription factor LBD24a [Brassica rapa var. rapa]
							Bra032939	A02	21698033	21699570	+	BnaA02g28150D [Brassica napus]
							Bra032940	A02	21700082	21702220	-	PREDICTED: probable magnesium transporter NIPA8 [Brassica rapa]
							Bra032941	A02	21704296	21705281	-	nudix hydrolase 13, mitochondrial-like [Brassica napus]
							Bra032942	A02	21712093	21715218	+	PREDICTED: nodulation receptor kinase-like [Brassica rapa]
							Bra032943	A02	21716379	21717435	+	PREDICTED: protein COFACTOR ASSEMBLY OF COMPLEX C SUBUNIT B CCB1, chloroplastic [Brassica rapa]
							Bra032944	A02	21718378	21721834	+	PREDICTED: RING finger protein 10 isoform X1 [Brassica rapa]
							Bra032945	A02	21722221	21722648	+	PREDICTED: light-regulated protein [Brassica rapa]
							Bra032946	A02	21726189	21726794	-	BnaA02g28210D [Brassica napus]
							Bra032947	A02	21730896	21732491	-	PREDICTED: transcription factor ICE1 [Brassica rapa]
							Bra032949	A02	21738466	21739774	+	short-chain dehydrogenase reductase ATA1-like [Brassica napus]
							Bra032950	A02	21743953	21753155	+	BnaAnng32100D [Brassica napus]
							Bra032951	A02	21755514	21758199	+	BnaA02g28260D [Brassica napus]
							Bra032952	A02	21762594	21764296	+	BnaC02g36340D [Brassica napus]
							Bra032953	A02	21768147	21770040	-	PREDICTED: B3 domain-containing transcription factor FUS3 [Brassica rapa]
							Bra032954	A02	21782268	21784649	+	protein AUXIN SIGNALING F-BOX 3 [Arabidopsis lyrata subsp. lyrata]
							Bra032955	A02	21786082	21787614	-	uncharacterized protein LOC106402232 [Brassica napus]
							Bra032957	A02	21805268	21810180	+	acyltransferase-like protein At3g26840, chloroplastic [Brassica napus]
							Bra032958	A02	21833406	21833807	+	acyltransferase-like protein At3g26840, chloroplastic isoform X1 [Brassica napus]
							Bra032959	A02	21836692	21839336	+	PREDICTED: acyltransferase-like protein At3g26840, chloroplastic [Brassica rapa]
							Bra032960	A02	21839437	21841935	-	PREDICTED: uncharacterized protein LOC103854287 isoform X1 [Brassica rapa]
							Bra032961	A02	21844919	21846797	-	BnaA02g28400D [Brassica napus]
							Bra032962	A02	21857210	21858495	-	BnaA02g28410D [Brassica napus]
							Bra032963	A02	21859668	21861777	-	PREDICTED: probable protein S-acyltransferase 7 [Brassica rapa]
							Bra032964	A02	21863318	21865309	-	PREDICTED: serine..threonine-protein kinase CDG1-like [Brassica rapa]
							Bra032965	A02	21874083	21874680	+	PREDICTED: membrane-anchored ubiquitin-fold protein 4-like [Brassica rapa]
							Bra032967	A02	21892853	21893614	+	PREDICTED: uncharacterized protein LOC103854354, partial [Brassica rapa]
							Bra032969	A02	21898670	21899281	+	PREDICTED: uncharacterized protein LOC103854353 [Brassica rapa]
							Bra032970	A02	21901412	21901833	-	PREDICTED: transcription factor TCP20-like [Brassica rapa]
							Bra032972	A02	21913380	21913991	+	PREDICTED: uncharacterized protein LOC103854276 [Brassica rapa]
							Bra032973	A02	21915783	21918030	-	BnaA02g28500D [Brassica napus]
							Bra032976	A02	21941540	21942870	+	PREDICTED: uncharacterized protein LOC103854275 [Brassica rapa]
							Bra032977	A02	21944457	21944666	-	BnaA02g28550D [Brassica napus]
							Bra032979	A02	21952700	21953698	-	PREDICTED: ribonucleoside-diphosphate reductase small chain C [Brassica rapa]
							Bra032980	A02	21957126	21958444	-	mitochondrial import receptor subunit TOM20-3 [Brassica napus]
							Bra032981	A02	21970114	21971240	+	PREDICTED: B2 protein-like [Brassica rapa]
							Bra032982	A02	21977254	21981048	-	PREDICTED: fidgetin-like protein 1 [Brassica rapa]
							Bra032983	A02	21982161	21983396	-	PREDICTED: F-box..kelch-repeat protein At3g27150-like [Brassica rapa]
							Bra032984	A02	21995219	21996004	+	PREDICTED: uncharacterized protein LOC103854264 [Brassica rapa]
							Bra032985	A02	22002425	22005508	+	chloride channel protein CLC-b-like isoform X1 [Brassica napus]
							Bra032986	A02	22007089	22010457	-	PREDICTED: uridine kinase-like protein 2, chloroplastic [Brassica oleracea var. oleracea]
							Bra032987	A02	22011441	22012034	-	PREDICTED: mavicyanin-like [Brassica rapa]
							Bra032988	A02	22013102	22013669	-	PREDICTED: uncharacterized protein At3g27210-like isoform X1 [Brassica rapa]
							Bra032989	A02	22014898	22016283	+	PREDICTED: SNAP25 homologous protein SNAP33-like [Brassica rapa]
							Bra032991	A02	22042883	22044503	-	PREDICTED: cytochrome c1 1, heme protein, mitochondrial-like [Brassica rapa]
							Bra032992	A02	22050151	22050984	+	uncharacterized protein LOC106401995 [Brassica napus]
							Bra032993	A02	22069574	22070141	-	PREDICTED: 1,4-dihydroxy-2-naphthoyl-CoA thioesterase 1-like [Brassica rapa]
							Bra032995	A02	22078564	22079316	+	PREDICTED: TLC domain-containing protein At5g14285 [Brassica rapa]
							Bra032996	A02	22083981	22085693	+	probable disease resistance protein RPP1 [Brassica napus]
							Bra032997	A02	22086761	22088869	+	PREDICTED: probable carboxylesterase 11 [Brassica rapa]
							Bra032998	A02	22089526	22093825	-	PREDICTED: ATP-dependent RNA helicase DEAH13 [Brassica rapa]
							Bra032999	A02	22097624	22103104	+	PREDICTED: uncharacterized protein LOC103854245 isoform X2 [Brassica rapa]
							Bra033000	A02	22103599	22103793	-	BnaA02g28830D [Brassica napus]
							Bra033001	A02	22108135	22108374	-	BnaAnng40130D [Brassica napus]
							Bra033003	A02	22115506	22117278	-	PREDICTED: glycosyltransferase family 92 protein RCOM_0530710 [Brassica rapa]
							Bra033004	A02	22120338	22121655	+	BnaA02g28860D [Brassica napus]
							Bra033005	A02	22131199	22132655	+	PREDICTED: protein WVD2-like 7 [Brassica rapa]
							Bra033006	A02	22133618	22135719	-	PREDICTED: succinate dehydrogenase [ubiquinone] iron-sulfur subunit 1, mitochondrial-like [Brassica rapa]
							Bra033007	A02	22141734	22144821	-	uncharacterized membrane protein At3g27390-like [Brassica napus]
							Bra033008	A02	22148206	22150856	+	putative pectate lyase 11 [Brassica napus]
							Bra033009	A02	22151881	22152264	-	PREDICTED: uncharacterized protein LOC103854342 [Brassica rapa]
							Bra033010	A02	22153202	22156750	+	BnaA02g28930D [Brassica napus]
							Bra033011	A02	22158152	22160172	+	PREDICTED: proteasome subunit beta type-7-A [Brassica rapa]
							Bra033012	A02	22161177	22173247	-	BnaA02g28950D [Brassica napus]
							Bra033014	A02	22191219	22192557	-	BnaAnng40390D [Brassica napus]
							Bra033015	A02	22193248	22193994	+	RNA polymerase II C-terminal domain phosphatase-like 4 [Brassica napus]
							Bra033016	A02	22194408	22205668	-	BnaA06g32030D [Brassica napus]
							Bra033017	A02	22209574	22212041	-	PREDICTED: uncharacterized CRM domain-containing protein At3g25440, chloroplastic-like [Brassica rapa]
							Bra033018	A02	22212871	22215295	-	PREDICTED: uncharacterized protein LOC103854224 [Brassica rapa]
							Bra033019	A02	22222695	22223093	+	transcription factor LBD25b [Brassica rapa var. rapa]
							Bra033020	A02	22227032	22227341	-	BnaA02g28990D [Brassica napus]
							Bra033021	A02	22228379	22229341	+	BnaA02g29000D [Brassica napus]
							Bra033022	A02	22231715	22232600	+	PREDICTED: chlorophyll a-b binding protein 5, chloroplastic [Raphanus sativus]
							Bra033023	A02	22233262	22236153	-	PREDICTED: zinc finger CCCH domain-containing protein 41-like [Brassica rapa]
							Bra033024	A02	22239455	22241035	+	PREDICTED: probable E3 ubiquitin-protein ligase ARI3 [Brassica rapa]
							Bra033025	A02	22241274	22247139	-	PREDICTED: DExH-box ATP-dependent RNA helicase DExH17 [Brassica rapa]
							Bra033026	A02	22248333	22250413	-	PREDICTED: uncharacterized protein LOC103854216 [Brassica rapa]
							Bra033027	A02	22251113	22253260	-	transcription factor MYB118-like [Brassica napus]
							Bra033028	A02	22257619	22260680	+	PREDICTED: monodehydroascorbate reductase 4, peroxisomal-like [Brassica rapa]
							Bra033029	A02	22262571	22263152	+	PREDICTED: 50S ribosomal protein L12-1, chloroplastic [Brassica rapa]
							Bra033030	A02	22267646	22268419	+	PREDICTED: uncharacterized protein LOC103854211 [Brassica rapa]
							Bra033032	A02	22278201	22280203	+	BnaA02g29130D [Brassica napus]
							Bra033033	A02	22289672	22292964	+	BnaA02g29140D [Brassica napus]
							Bra033034	A02	22295276	22297037	-	BnaA02g29150D [Brassica napus]
							Bra033035	A02	22303607	22306196	+	PREDICTED: WAT1-related protein At3g28050 isoform X1 [Brassica rapa]
							Bra033036	A02	22309339	22309766	-	BnaAnng32290D [Brassica napus]
							Bra033037	A02	22311449	22314552	+	WAT1-related protein At3g28100-like [Brassica napus]
							Bra033038	A02	22315358	22320424	-	PREDICTED: uncharacterized protein LOC106338374 [Brassica oleracea var. oleracea]
							Bra033039	A02	22345322	22346302	+	BnaA02g29210D [Brassica napus]
							Bra033040	A02	22351170	22352129	+	BnaA02g29220D [Brassica napus]
							Bra033041	A02	22362838	22364100	-	PREDICTED: F-box protein At3g28330-like [Brassica rapa]
							Bra033043	A02	22375466	22380720	-	PREDICTED: ABC transporter B family member 15-like isoform X1 [Brassica rapa]
							Bra033044	A02	22388722	22390069	+	uncharacterized protein LOC106419636 [Brassica napus]
							Bra033045	A02	22416863	22417483	-	uncharacterized protein LOC106421588 [Brassica napus]
							Bra033046	A02	22421507	22423231	+	PREDICTED: inactive LRR receptor-like serine..threonine-protein kinase BIR2 [Brassica rapa]
							Bra033047	A02	22425075	22425386	-	PREDICTED: CLAVATA3..ESR ..CLE..-related protein 25-like [Brassica rapa]
							Bra033048	A02	22427244	22427781	-	transcription factor MYB35-like [Brassica napus]
							Bra033049	A02	22428440	22428784	+	60S acidic ribosomal protein P2-3-like [Brassica napus]
							Bra033050	A02	22431126	22432889	+	BnaA02g29330D [Brassica napus]
							Bra033051	A02	22436237	22437778	+	PREDICTED: AAA-ATPase At3g28510-like isoform X1 [Brassica rapa]
							Bra033052	A02	22440310	22441380	+	BnaA08g07490D [Brassica napus]
							Bra033053	A02	22445518	22447592	+	PREDICTED: probable receptor-like protein kinase At5g15080 isoform X2 [Brassica rapa]
							Bra033054	A02	22448794	22451365	+	V-type proton ATPase subunit d1-like isoform X2 [Brassica napus]
							Bra033055	A02	22453637	22456999	+	PREDICTED: FACT complex subunit SSRP1 [Raphanus sativus]
							Bra033056	A02	22457261	22459150	-	PREDICTED: cytochrome P450 81D11-like [Brassica oleracea var. oleracea]
							Bra033057	A02	22459631	22464560	-	cytochrome P450 81D11-like [Brassica napus]
							Bra033058	A02	22468790	22477566	+	PREDICTED: trichohyalin [Brassica rapa]
							Bra033059	A02	22480217	22482411	-	uncharacterized transmembrane protein DDB_G0289901-like [Brassica napus]
							Bra033060	A02	22491889	22494404	-	PREDICTED: uncharacterized protein LOC103854183 [Brassica rapa]
							Bra033061	A02	22498193	22499062	-	PREDICTED: uncharacterized protein LOC103854182 [Brassica rapa]
							Bra033062	A02	22501023	22502036	+	PREDICTED: uncharacterized protein At5g39865-like [Brassica rapa]
							Bra033063	A02	22504533	22505067	-	PREDICTED: transcription factor PRE5-like [Brassica rapa]
							Bra033064	A02	22512969	22513409	-	BnaA02g29470D [Brassica napus]
							Bra033065	A02	22519827	22523309	+	PREDICTED: uncharacterized protein LOC103854179 [Brassica rapa]
							Bra033066	A02	22523815	22531354	-	BnaA02g29500D [Brassica napus]
							Bra033067	A02	22526810	22528199	+	PREDICTED: transcription factor MYB30-like [Brassica rapa]
							Bra033068	A02	22534365	22535065	-	BnaA02g29510D [Brassica napus]
							Bra033070	A02	22540102	22540955	-	PREDICTED: protein AIG2-like [Brassica rapa]
							Bra033072	A02	22546586	22550922	-	BnaA02g29550D [Brassica napus]
							Bra033073	A02	22552682	22553312	-	protein yippee-like At3g08990 [Brassica napus]
							Bra033074	A02	22558349	22558996	-	PREDICTED: protein yippee-like At3g08990 [Brassica rapa]
							Bra033075	A02	22560724	22562248	-	amino acid transporter AVT1I isoform X1 [Brassica napus]
							Bra033076	A02	22564171	22565755	-	PREDICTED: uncharacterized protein LOC103854167 isoform X1 [Brassica rapa]
							Bra033077	A02	22567046	22567606	+	PREDICTED: probable calcium-binding protein CML30 [Brassica rapa]
							Bra033078	A02	22569147	22570075	-	PREDICTED: myb-related protein MYBAS1 [Brassica rapa]
							Bra033079	A02	22576475	22576738	-	PREDICTED: uncharacterized protein LOC108809775 [Raphanus sativus]
							Bra033080	A02	22581748	22585701	-	phosphate transporter PHO1 homolog 9-like [Brassica napus]
							Bra033081	A02	22586092	22587445	+	transmembrane emp24 domain-containing protein p24delta11-like [Brassica napus]
							Bra033082	A02	22587929	22589596	-	PREDICTED: uncharacterized protein At5g39570-like [Raphanus sativus]
							Bra033083	A02	22590264	22591881	+	PREDICTED: pectinesterase 31 [Tarenaya hassleriana]
							Bra033085	A02	22604170	22605138	-	BnaA02g29700D [Brassica napus]
							Bra033087	A02	22608727	22610768	-	BnaA02g29710D [Brassica napus]
							Bra033088	A02	22613073	22615791	-	PREDICTED: SNF1-related protein kinase catalytic subunit alpha KIN11-like [Brassica rapa]
							Bra033089	A02	22617049	22618311	-	PREDICTED: transmembrane protein 230-like [Brassica rapa]
							Bra033091	A02	22626855	22627322	-	PREDICTED: uncharacterized protein LOC103854147 [Brassica rapa]
							Bra033092	A02	22630110	22631116	+	PREDICTED: uncharacterized protein LOC103854146 [Brassica rapa]
							Bra033093	A02	22635187	22635915	+	PREDICTED: uncharacterized protein LOC103854144 [Brassica rapa]
							Bra033094	A02	22636529	22638472	-	BnaA02g29790D [Brassica napus]
							Bra033095	A02	22639474	22640518	-	PREDICTED: uncharacterized protein LOC103854142 isoform X1 [Brassica rapa]
							Bra033096	A02	22641173	22641757	+	BnaA02g29810D [Brassica napus]
							Bra033097	A02	22642334	22643814	+	PREDICTED: BAG family molecular chaperone regulator 8, chloroplastic-like [Brassica rapa]
							Bra033098	A02	22645128	22649919	+	PREDICTED: alpha-glucan phosphorylase 1-like isoform X1 [Brassica rapa]
							Bra033099	A02	22651317	22652219	+	expansin-A23-like precursor [Brassica rapa]
							Bra033100	A02	22654116	22654774	-	BnaC03g66820D [Brassica napus]
							Bra033101	A02	22677213	22678321	-	PREDICTED: plant-specific TFIIB-related protein 2-like [Brassica rapa]
							Bra033102	A02	22687288	22690826	-	PREDICTED: uncharacterized protein LOC103833972 [Brassica rapa]
							Bra033103	A02	22693749	22698474	+	PREDICTED: protein RIK-like isoform X1 [Brassica rapa]
							Bra033104	A02	22698834	22700774	-	exocyst complex component EXO70E2-like [Brassica napus]
							Bra033105	A02	22706355	22707123	-	PREDICTED: ninja-family protein AFP3-like [Brassica rapa]
							Bra033106	A02	22709776	22709964	-	BnaA02g29920D [Brassica napus]
							Bra033107	A02	22713681	22715015	-	PREDICTED: BAHD acyltransferase At3g29680-like [Brassica rapa]
							Bra033109	A02	22725980	22727240	+	PREDICTED: 40S ribosomal protein S4-1-like [Brassica rapa]
							Bra033110	A02	22732289	22734557	+	putative methylesterase 11, chloroplastic [Brassica napus]
							Bra033111	A02	22734918	22735265	+	PREDICTED: protein RALF-like 27 [Brassica rapa]
							Bra033112	A02	22735747	22735980	+	BnaA02g29960D [Brassica napus]
							Bra033113	A02	22742611	22744893	+	BnaA02g29970D [Brassica napus]
							Bra033114	A02	22751844	22752717	+	BnaUnng01860D [Brassica napus]
							Bra020747	A02	22780454	22783117	+	cytochrome P450 85A2-like [Brassica napus]
							Bra020744	A02	22794253	22797915	+	BnaAnng07760D [Brassica napus]
							Bra020742	A02	22817099	22826398	+	uncharacterized protein LOC106400140 [Brassica napus]
							Bra020743	A02	22823514	22823978	-	BnaAnng07810D [Brassica napus]
							Bra020741	A02	22830651	22831639	-	uncharacterized protein LOC106398993 [Brassica napus]
							Bra020739	A02	22851873	22853074	-	root meristem growth factor 4 [Brassica napus]
							Bra020738	A02	22858743	22860549	+	protein ABHD17B-like [Brassica napus]
							Bra020737	A02	22861040	22863222	-	amino acid transporter AVT6A-like [Brassica napus]
							Bra020735	A02	22879352	22879867	+	PREDICTED: basic leucine zipper 43-like [Brassica rapa]
							Bra020734	A02	22887633	22888043	-	PREDICTED: micronuclear linker histone polyprotein-like [Brassica rapa]
							Bra020733	A02	22896316	22898741	-	--
							Bra020732	A02	22899852	22900196	+	PREDICTED: protein GLUTAMINE DUMPER 6-like [Brassica rapa]
							Bra020731	A02	22907012	22909412	-	proline dehydrogenase 1, mitochondrial [Brassica rapa]
							Bra020730	A02	22923593	22925756	+	PREDICTED: uncharacterized protein LOC103854503 [Brassica rapa]
							Bra020729	A02	22929341	22935136	+	kinesin-like protein KIN-4A [Brassica napus]
							Bra020728	A02	22935637	22936292	-	PREDICTED: uncharacterized protein LOC103854504, partial [Brassica rapa]
							Bra020727	A02	22939737	22943218	+	PREDICTED: protein ACCELERATED CELL DEATH 6 [Brassica rapa]
							Bra020725	A02	22946629	22947941	+	BnaAnng07980D [Brassica napus]
							Bra020724	A02	22952534	22956998	+	PREDICTED: respiratory burst oxidase homolog protein D [Raphanus sativus]
							Bra020723	A02	22959649	22960185	-	PREDICTED: uncharacterized protein LOC103854510 isoform X1 [Brassica rapa]
							Bra020722	A02	22963065	22963679	-	PREDICTED: 40S ribosomal protein S27-2 [Raphanus sativus]
							Bra020721	A02	22964756	22967919	-	PREDICTED: chaperone protein dnaJ GFA2, mitochondrial [Brassica rapa]
							Bra020720	A02	22968361	22971851	-	transparent testa BraA.TT10a [Brassica rapa]
							Bra020719	A02	22973541	22979049	-	PREDICTED: MMS19 nucleotide excision repair protein homolog [Brassica rapa]
							Bra020716	A02	23007297	23008749	-	polygalacturonase-like [Brassica napus]
							Bra020715	A02	23009864	23011545	-	PREDICTED: scarecrow-like transcription factor PAT1 [Brassica rapa]
							Bra020714	A02	23024544	23025014	-	PREDICTED: F-box protein SNE [Brassica rapa]
							Bra020712	A02	23050783	23051088	+	uncharacterized protein LOC111212457 [Brassica napus]
							Bra020711	A02	23054923	23055231	+	BnaA02g30020D [Brassica napus]
							Bra020709	A02	23060751	23062254	-	PREDICTED: zinc finger protein CONSTANS-LIKE 10-like [Brassica rapa]
							Bra020708	A02	23068738	23069706	-	uncharacterized protein LOC106428118 [Brassica napus]
							Bra020707	A02	23078708	23079441	+	histone H3.2 [Rosa chinensis]
							Bra020706	A02	23082861	23097656	+	receptor-like protein 12 [Brassica napus]
							Bra020705	A02	23102914	23105135	-	probably inactive leucine-rich repeat receptor-like protein kinase At5g48380 [Brassica napus]
							Bra020704	A02	23108032	23110321	+	PREDICTED: FRIGIDA-like protein 3 [Brassica rapa]
							Bra020703	A02	23111389	23120962	+	PREDICTED: glutamate receptor 1.3-like [Brassica rapa]
							Bra020702	A02	23123298	23126784	+	glutamate receptor 1.3-like isoform X1 [Brassica napus]
							Bra020701	A02	23128314	23136469	+	PREDICTED: glutamate receptor 1.2-like isoform X2 [Brassica rapa]
							Bra020700	A02	23136804	23139617	-	monocopper oxidase-like protein SKU5 isoform X1 [Eutrema salsugineum]
							Bra020697	A02	23148500	23152097	+	BnaA02g30200D [Brassica napus]
							Bra020696	A02	23152783	23153097	-	putative lipid-transfer protein DIR1 [Brassica napus]
							Bra020695	A02	23158852	23159600	+	PREDICTED: uncharacterized protein LOC103854542 isoform X1 [Brassica rapa]
							Bra020694	A02	23166968	23167393	+	PREDICTED: transcription factor bHLH78-like [Brassica rapa]
							Bra020693	A02	23172610	23174933	+	PREDICTED: protein SUPPRESSOR OF npr1-1, CONSTITUTIVE 1-like [Brassica oleracea var. oleracea]
							Bra020691	A02	23184195	23186552	+	PREDICTED: transcription factor bHLH78-like [Brassica rapa]
							Bra020690	A02	23192663	23193837	-	PREDICTED: peptidyl-prolyl cis-trans isomerase FKBP15-2-like [Brassica rapa]
							Bra020689	A02	23195557	23196905	-	PREDICTED: GTP cyclohydrolase 1-like [Brassica rapa]
							Bra020688	A02	23204660	23205928	+	chalcone synthase [Fourraea alpina]
							Bra020686	A02	23208723	23210189	-	BnaA02g30350D [Brassica napus]
							Bra020685	A02	23214632	23216182	-	cyclin-C1-1 [Brassica napus]
							Bra020684	A02	23217156	23217863	-	PREDICTED: E3 ubiquitin-protein ligase RNF4-like [Brassica rapa]
							Bra020683	A02	23218893	23219771	+	PREDICTED: uncharacterized protein LOC103854553 [Brassica rapa]
							Bra020682	A02	23223621	23225190	+	PREDICTED: protein XRI1-like isoform X1 [Brassica rapa]
							Bra020681	A02	23227133	23229167	-	PREDICTED: 60S ribosomal protein L13a-4-like [Brassica rapa]
							Bra020680	A02	23231034	23232578	+	BnaAnng40510D [Brassica napus]
							Bra020678	A02	23237447	23238265	-	BnaCnng68950D [Brassica napus]
							Bra020677	A02	23242842	23244742	-	PREDICTED: uncharacterized protein LOC103854560 [Brassica rapa]
							Bra020676	A02	23246298	23246837	-	PREDICTED: pantoate--beta-alanine ligase-like [Brassica rapa]
							Bra020675	A02	23247276	23249192	-	PREDICTED: protein SULFUR DEFICIENCY-INDUCED 1-like [Brassica rapa]
							Bra020674	A02	23266079	23266957	+	sm-like protein LSM5 [Brassica napus]
							Bra020673	A02	23267159	23269400	-	PREDICTED: 3-ketoacyl-CoA thiolase 5, peroxisomal isoform X1 [Brassica rapa]
							Bra020672	A02	23275410	23279000	+	PREDICTED: probable pectate lyase 20 [Brassica rapa]
							Bra020671	A02	23285282	23286783	-	PREDICTED: UPF0725 protein At3g19520-like [Brassica rapa]
							Bra020670	A02	23288484	23289756	+	BnaA02g30500D [Brassica napus]
							Bra020668	A02	23296188	23299756	+	PREDICTED: cytosolic purine 5'-nucleotidase-like [Brassica rapa]
							Bra020667	A02	23300508	23303657	+	PREDICTED: probable histone-arginine methyltransferase 1.4 isoform X1 [Brassica rapa]
							Bra020666	A02	23304389	23311136	-	PREDICTED: isoleucine--tRNA ligase, chloroplastic..mitochondrial [Brassica oleracea var. oleracea]
							Bra020665	A02	23312073	23312576	+	PREDICTED: universal stress protein PHOS34 [Brassica rapa]
							Bra020664	A02	23313274	23314605	-	PREDICTED: probable 3-ketoacyl-CoA synthase 21 [Brassica rapa]
							Bra020663	A02	23318952	23320016	-	PREDICTED: uncharacterized protein DDB_G0271670-like [Brassica rapa]
HH, PEL	qHH-3, qPEL-2	A03	A3S20-A3S49	132.08-141.56	9.48	22308150-25478614	Bra012784	A03	22311911	22313383	-	PREDICTED: UDP-glycosyltransferase 84A1 [Brassica rapa]
							Bra012783	A03	22314658	22318384	+	uncharacterized protein LOC111210521 [Brassica napus]
							Bra012782	A03	22322707	22323735	+	PREDICTED: uncharacterized protein LOC103860786 [Brassica rapa]
							Bra012781	A03	22324147	22328313	-	pyruvate, phosphate dikinase 1, chloroplastic [Brassica napus]
							Bra012780	A03	22331272	22333683	-	UDP-glycosyltransferase 75D1-like [Brassica napus]
							Bra012779	A03	22336843	22339709	+	BnaC07g33090D [Brassica napus]
							Bra012778	A03	22340483	22341459	-	PREDICTED: heavy metal-associated isoprenylated plant protein 22-like [Brassica rapa]
							Bra012777	A03	22349780	22351334	+	PREDICTED: CASP-like protein 1D1 [Brassica rapa]
							Bra012775	A03	22364595	22365823	+	PREDICTED: CASP-like protein 1E1 [Brassica rapa]
							Bra012774	A03	22367631	22368828	+	PREDICTED: uncharacterized protein LOC103860792 isoform X1 [Brassica rapa]
							Bra012773	A03	22372065	22372373	+	monothiol glutaredoxin-S4-like [Brassica napus]
							Bra012772	A03	22376054	22377892	+	PREDICTED: pentatricopeptide repeat-containing protein At4g15720 [Brassica rapa]
							Bra012771	A03	22380957	22381817	+	PREDICTED: protein SRC2-like [Brassica rapa]
							Bra012770	A03	22382295	22383608	-	protein SRC2-like [Brassica napus]
							Bra012768	A03	22386805	22387434	-	PREDICTED: protein SRC2-like [Brassica rapa]
							Bra012767	A03	22388415	22390139	-	PREDICTED: uncharacterized protein LOC103860798 [Brassica rapa]
							Bra012766	A03	22390590	22391104	-	PREDICTED: UPF0725 protein At4g11700 [Brassica rapa]
							Bra012765	A03	22392582	22393145	+	60S ribosome subunit biogenesis protein NIP7 homolog [Brassica napus]
							Bra012764	A03	22395966	22396301	+	PREDICTED: protein RALF-like 33 [Brassica rapa]
							Bra012763	A03	22397942	22398891	-	predicted protein [Arabidopsis lyrata subsp. lyrata]
							Bra012762	A03	22401834	22403665	+	PREDICTED: uncharacterized protein LOC103860803 [Brassica rapa]
							Bra012761	A03	22404510	22408276	+	PREDICTED: uncharacterized protein LOC108855386 isoform X1 [Raphanus sativus]
							Bra012760	A03	22410179	22410806	+	PREDICTED: uncharacterized protein LOC103860801 [Brassica rapa]
							Bra012759	A03	22414560	22415323	+	PREDICTED: uncharacterized protein LOC103860806 [Brassica rapa]
							Bra012758	A03	22416041	22420268	-	PREDICTED: ubiquitin-like-specific protease ESD4 isoform X1 [Brassica rapa]
							Bra012757	A03	22422479	22424700	-	11-beta-hydroxysteroid dehydrogenase-like 3 [Brassica napus]
							Bra012756	A03	22427780	22429312	+	PREDICTED: probable pectate lyase 4 [Brassica rapa]
							Bra012755	A03	22432015	22436460	-	PREDICTED: kinesin-like protein KIN-13A isoform X1 [Brassica rapa]
							Bra012754	A03	22438890	22444255	+	PREDICTED: condensin-2 complex subunit D3 [Brassica rapa]
							Bra012753	A03	22449546	22452876	+	PREDICTED: protein pleiotropic regulatory locus 1 [Brassica rapa]
							Bra012752	A03	22453768	22456653	-	PREDICTED: bidirectional sugar transporter SWEET17 [Brassica rapa]
							Bra012751	A03	22459698	22460229	+	dynein light chain 2, cytoplasmic [Brassica napus]
							Bra012750	A03	22460576	22461830	-	PREDICTED: bifunctional epoxide hydrolase 2 [Brassica rapa]
							Bra012749	A03	22464092	22465976	-	uncharacterized protein BNAA03G42290D [Brassica napus]
							Bra012748	A03	22475059	22475475	+	uncharacterized protein LOC106419205 [Brassica napus]
							Bra012747	A03	22481811	22483230	+	PREDICTED: bifunctional epoxide hydrolase 2 [Brassica rapa]
							Bra012746	A03	22483558	22485291	-	PREDICTED: nudix hydrolase 7-like [Brassica rapa]
							Bra012745	A03	22491385	22494721	-	PREDICTED: uncharacterized protein LOC103860822 [Brassica rapa]
							Bra012744	A03	22500167	22501636	+	PREDICTED: LOW QUALITY PROTEIN: uncharacterized protein LOC103860824 [Brassica rapa]
							Bra012743	A03	22512067	22515221	+	PREDICTED: two-component response regulator ARR2 isoform X2 [Brassica rapa]
							Bra012742	A03	22516921	22517634	-	GATA transcription factor 17-like [Brassica napus]
							Bra012741	A03	22519019	22520753	-	importin subunit alpha-2 [Brassica napus]
							Bra012739	A03	22526316	22529475	-	PREDICTED: AMSH-like ubiquitin thioesterase 3 [Brassica oleracea var. oleracea]
							Bra012738	A03	22538082	22539446	-	PREDICTED: LOW QUALITY PROTEIN: dihydrolipoyl dehydrogenase 2, chloroplastic [Brassica rapa]
							Bra012737	A03	22539811	22540983	+	PREDICTED: outer envelope pore protein 16-2, chloroplastic-like [Brassica rapa]
							Bra012735	A03	22545991	22546659	+	transcription factor bHLH147-like [Brassica napus]
							Bra012734	A03	22547402	22552185	-	uncharacterized protein LOC106446577 [Brassica napus]
							Bra012733	A03	22552488	22553856	+	probable cysteine protease RD19C [Brassica napus]
							Bra012732	A03	22554012	22554485	-	S-protein homolog 2-like [Brassica napus]
							Bra012731	A03	22554732	22555690	-	probable enoyl-CoA hydratase 1, peroxisomal [Brassica napus]
							Bra012730	A03	22558028	22558327	+	60S ribosomal protein L37-2 [Brassica napus]
							Bra012728	A03	22563322	22565054	+	RecName: Full=GDSL esterase..lipase At4g16230; AltName: Full=Extracellular lipase At4g16230; Flags: Precursor
							Bra012726	A03	22571501	22574778	+	PREDICTED: uncharacterized protein LOC108871255 [Brassica rapa]
							Bra012725	A03	22578201	22579323	+	PREDICTED: SNF1-related protein kinase regulatory subunit beta-2-like isoform X1 [Brassica rapa]
							Bra012724	A03	22584334	22585180	+	pollen-specific leucine-rich repeat extensin-like protein 1 isoform X1 [Brassica napus]
							Bra012723	A03	22586718	22586975	+	PREDICTED: uncharacterized protein LOC106303279 [Brassica oleracea var. oleracea]
							Bra012722	A03	22587148	22587690	-	PREDICTED: uncharacterized protein LOC103860845 [Brassica rapa]
							Bra012721	A03	22587864	22590255	-	PREDICTED: transcriptional adapter ADA2b-like isoform X1 [Brassica rapa]
							Bra012720	A03	22592364	22593734	+	transcription factor bHLH3-like [Brassica napus]
							Bra012719	A03	22593990	22595000	-	PREDICTED: CASP-like protein 2B1 [Brassica rapa]
							Bra012718	A03	22595725	22596803	-	PREDICTED: uncharacterized protein LOC103860850 [Brassica rapa]
							Bra012717	A03	22600231	22600608	+	PREDICTED: uncharacterized protein LOC103860851 [Brassica rapa]
							Bra012716	A03	22601986	22602399	+	PREDICTED: NADH-ubiquinone oxidoreductase 20.9 kDa subunit-like [Brassica rapa]
							Bra012715	A03	22604376	22605073	+	protein pxr1 [Brassica napus]
							Bra012714	A03	22609141	22611048	+	PREDICTED: inositol transporter 4 [Tarenaya hassleriana]
							Bra012713	A03	22611734	22613185	-	PREDICTED: U-box domain-containing protein 4-like [Brassica rapa]
							Bra012712	A03	22628700	22629041	-	cysteine proteinase inhibitor 4 [Brassica napus]
							Bra012711	A03	22631686	22631931	-	root meristem growth factor 6-like [Brassica napus]
							Bra012710	A03	22633368	22634202	-	PREDICTED: autophagy-related protein 8f-like [Brassica rapa]
							Bra012709	A03	22640441	22641109	+	leukocyte receptor cluster member 1-like isoform X2 [Brassica napus]
							Bra012708	A03	22642374	22643339	-	PREDICTED: putative 57 kDa heat shock protein isoform X1 [Brassica rapa]
							Bra012707	A03	22646084	22647008	-	PREDICTED: putative 57 kDa heat shock protein [Brassica rapa]
							Bra012706	A03	22649345	22651799	-	PREDICTED: LOW QUALITY PROTEIN: cysteine-rich receptor-like protein kinase 13 [Brassica rapa]
							Bra012705	A03	22653878	22657350	-	PREDICTED: putative 57 kDa heat shock protein [Brassica rapa]
							Bra012704	A03	22660282	22660958	-	putative 57 kDa heat shock protein [Brassica napus]
							Bra012703	A03	22666627	22675105	-	BnaC07g33850D [Brassica napus]
							Bra012702	A03	22676881	22681389	+	probable mannan synthase 1 [Eutrema salsugineum]
							Bra012701	A03	22687203	22687847	-	PREDICTED: zinc finger protein ZAT1-like [Brassica rapa]
							Bra012700	A03	22690740	22692407	-	PREDICTED: WAT1-related protein At4g16620 [Brassica rapa]
							Bra012699	A03	22698672	22699766	-	PREDICTED: metalloendoproteinase 1-MMP-like [Brassica rapa]
							Bra012698	A03	22703321	22708032	-	hypothetical protein ARALYDRAFT_898463 [Arabidopsis lyrata subsp. lyrata]
							Bra012696	A03	22715409	22719277	+	heat shock 70 kDa protein 17-like [Brassica napus]
							Bra012695	A03	22720743	22720989	+	uncharacterized protein LOC106440270 isoform X1 [Brassica napus]
							Bra012694	A03	22721949	22724159	-	BnaC07g50070D [Brassica napus]
							Bra012693	A03	22732904	22733437	-	PREDICTED: ethylene-responsive transcription factor ERF039-like [Brassica rapa]
							Bra012691	A03	22738914	22741827	-	2-oxoglutarate-Fe..II.. type oxidoreductase isoform X1 [Arabidopsis lyrata subsp. lyrata]
							Bra012690	A03	22746731	22748263	+	phospholipase A1-Ibeta2, chloroplastic [Brassica napus]
							Bra012689	A03	22748848	22755373	-	PREDICTED: protein SUPPRESSOR OF npr1-1, CONSTITUTIVE 1 [Brassica rapa]
							Bra012688	A03	22755751	22761669	-	PREDICTED: disease resistance protein RPP4-like [Brassica rapa]
							Bra012687	A03	22765165	22766704	-	PREDICTED: expansin-like B1 [Brassica rapa]
							Bra012686	A03	22769293	22771272	-	BnaCnng62590D [Brassica napus]
							Bra012685	A03	22772998	22774131	-	PREDICTED: putative F-box protein At3g22650 [Brassica rapa]
							Bra012684	A03	22775094	22777822	-	BnaA03g58070D [Brassica napus]
							Bra012683	A03	22782406	22784623	-	PREDICTED: ATP-dependent Clp protease proteolytic subunit-related protein 4, chloroplastic-like [Brassica rapa]
							Bra012682	A03	22784987	22787406	+	PREDICTED: ..S..-ureidoglycine aminohydrolase isoform X4 [Brassica rapa]
							Bra012680	A03	22800481	22805937	+	PREDICTED: cationic amino acid transporter 6, chloroplastic-like isoform X2 [Brassica rapa]
							Bra012679	A03	22815886	22816632	+	protein ACCELERATED CELL DEATH 6-like [Brassica napus]
							Bra012678	A03	22819339	22823051	+	PREDICTED: death-associated protein kinase dapk-1-like [Brassica rapa]
							Bra012676	A03	22829181	22831081	-	hypothetical protein AALP_AA1G332100 [Arabis alpina]
							Bra012675	A03	22833366	22835566	-	PREDICTED: poly..U..-specific endoribonuclease-B [Brassica rapa]
							Bra012674	A03	22838975	22839542	-	GTP-binding protein RAB2A, putative [Brassica oleracea]
							Bra012673	A03	22850720	22851235	+	uncharacterized protein LOC106440250 [Brassica napus]
							Bra012672	A03	22855932	22858160	+	PREDICTED: uncharacterized protein LOC103860903 isoform X1 [Brassica rapa]
							Bra012671	A03	22859249	22860371	+	L-lactate dehydrogenase B [Brassica napus]
							Bra012670	A03	22862375	22864495	+	hypothetical protein AALP_AA2G092900 [Arabis alpina]
							Bra012669	A03	22866167	22867815	+	VAN3-binding protein-like [Brassica napus]
							Bra012668	A03	22868226	22869879	+	hypothetical protein AXX17_AT4G20420 [Arabidopsis thaliana]
							Bra012667	A03	22870592	22872068	-	60S ribosomal protein L15-1-like [Brassica napus]
							Bra012665	A03	22878996	22880161	-	PREDICTED: uncharacterized protein LOC103860911 [Brassica rapa]
							Bra012664	A03	22883377	22884204	+	PREDICTED: uncharacterized protein LOC103860912 [Brassica rapa]
							Bra012663	A03	22894734	22895838	+	PREDICTED: homeobox-leucine zipper protein HAT1-like isoform X2 [Brassica rapa]
							Bra012662	A03	22896572	22898107	-	PREDICTED: palmitoyl-protein thioesterase 1 isoform X1 [Brassica rapa]
							Bra012661	A03	22898742	22899607	-	PREDICTED: deSI-like protein At4g17486 [Brassica rapa]
							Bra012660	A03	22900588	22902055	-	PREDICTED: ubiquitin carboxyl-terminal hydrolase 3-like [Brassica rapa]
							Bra012659	A03	22902623	22904391	+	PREDICTED: plasminogen activator inhibitor 1 RNA-binding protein-like [Brassica rapa]
							Bra012658	A03	22904814	22906157	-	ras-related protein RABD2b-like [Brassica napus]
							Bra012657	A03	22910926	22913523	-	putative glycerol-3-phosphate transporter 4 [Brassica napus]
							Bra012655	A03	22921984	22923846	+	PREDICTED: calcineurin B-like protein 1 [Brassica rapa]
							Bra012654	A03	22924421	22926361	+	PREDICTED: pentatricopeptide repeat-containing protein At4g17616 [Brassica rapa]
							Bra012651	A03	22934290	22934927	-	PREDICTED: uncharacterized protein LOC103860927 [Brassica rapa]
							Bra012650	A03	22939903	22951793	-	PREDICTED: E3 ubiquitin-protein ligase BOI [Brassica rapa]
							Bra012649	A03	22958029	22958496	+	peroxidase 41-like [Brassica napus]
							Bra012648	A03	22972460	22972867	-	PREDICTED: putative defensin-like protein 307 [Brassica rapa]
							Bra012647	A03	22973896	22975720	-	PREDICTED: putative defensin-like protein 307 [Brassica rapa]
							Bra012646	A03	22981893	22983409	-	PREDICTED: binding partner of ACD11 1 [Brassica rapa]
							Bra012645	A03	22984234	22985571	+	PREDICTED: syntaxin-23 [Brassica rapa]
							Bra012644	A03	22985954	22988505	-	PREDICTED: carboxyl-terminal-processing peptidase 2, chloroplastic [Brassica rapa]
							Bra012643	A03	22990405	22991802	+	PREDICTED: uncharacterized protein LOC103860940 [Brassica rapa]
							Bra012642	A03	22998441	23001305	+	hypothetical protein PRUPE_5G031500 [Prunus persica]
							Bra012641	A03	23003357	23004779	-	transcription factor MYB39-like [Brassica napus]
							Bra012640	A03	23014551	23015971	+	PREDICTED: uncharacterized membrane protein At4g09580-like [Brassica rapa]
							Bra012639	A03	23020952	23021827	-	PREDICTED: AT-hook motif nuclear-localized protein 23 [Brassica rapa]
							Bra012638	A03	23037621	23038223	+	PREDICTED: LOW QUALITY PROTEIN: uncharacterized protein LOC103860946 [Brassica rapa]
							Bra012637	A03	23041420	23043468	+	PREDICTED: acetylornithine deacetylase-like [Brassica rapa]
							Bra012636	A03	23043634	23045370	-	PREDICTED: uncharacterized protein LOC103860948 [Brassica rapa]
							Bra012635	A03	23045837	23046412	+	PREDICTED: abscisic acid receptor PYR1 [Brassica rapa]
							Bra012634	A03	23053650	23060256	+	PREDICTED: ubiquitin carboxyl-terminal hydrolase 20 [Brassica rapa]
							Bra012632	A03	23069898	23071556	+	PREDICTED: uncharacterized protein LOC103860953 [Brassica rapa]
							Bra012631	A03	23073746	23075137	-	PREDICTED: putative pentatricopeptide repeat-containing protein At4g17915 [Brassica rapa]
							Bra012630	A03	23080892	23084026	-	PREDICTED: RING-H2 finger protein ATL29-like [Brassica rapa]
							Bra012628	A03	23090001	23091923	+	PREDICTED: uncharacterized protein LOC103860956 [Brassica rapa]
							Bra012627	A03	23098887	23101162	+	aluminum-activated malate transporter 12-like [Brassica napus]
							Bra012626	A03	23104173	23105291	-	NAC domain-containing protein 71-like [Brassica napus]
							Bra012624	A03	23141124	23144007	-	type I inositol polyphosphate 5-phosphatase 2-like isoform X2 [Brassica napus]
							Bra012623	A03	23167399	23170295	-	PREDICTED: two-component response regulator-like APRR2 [Raphanus sativus]
							Bra012622	A03	23181385	23182043	-	PREDICTED: eukaryotic translation initiation factor 4E-1-like, partial [Brassica rapa]
							Bra012621	A03	23194809	23199954	+	LOW QUALITY PROTEIN: ABC transporter B family member 9 [Eutrema salsugineum]
							Bra012620	A03	23200509	23202417	-	PREDICTED: SH3 domain-containing protein 3 [Brassica rapa]
							Bra012619	A03	23204340	23205348	+	PREDICTED: protein starmaker isoform X1 [Brassica rapa]
							Bra012618	A03	23206821	23208727	+	PREDICTED: uncharacterized protein LOC103860967 [Brassica rapa]
							Bra012617	A03	23209421	23216374	-	PREDICTED: LOW QUALITY PROTEIN: ABC transporter C family member 13 [Brassica rapa]
							Bra012616	A03	23217255	23217955	-	PREDICTED: 60S ribosomal protein L32-1 [Raphanus sativus]
							Bra012615	A03	23227792	23228901	+	PREDICTED: two-pore potassium channel 3-like [Brassica rapa]
							Bra012614	A03	23235102	23236224	+	probable WRKY transcription factor 28 [Brassica napus]
							Bra012613	A03	23243009	23246478	+	PREDICTED: exopolygalacturonase [Brassica rapa]
							Bra012612	A03	23246873	23247924	-	PREDICTED: UDP-N-acetylglucosamine transferase subunit ALG14-like isoform X1 [Brassica rapa]
							Bra012610	A03	23254316	23255659	+	PREDICTED: uncharacterized protein LOC103860976 isoform X1 [Brassica rapa]
							Bra012608	A03	23265197	23266513	-	uncharacterized protein At4g18257-like [Brassica napus]
							Bra012606	A03	23271069	23273760	-	PREDICTED: phospho-N-acetylmuramoyl-pentapeptide-transferase homolog [Brassica rapa]
							Bra012605	A03	23275797	23276198	+	PREDICTED: uncharacterized protein LOC103860982 [Brassica rapa]
							Bra012604	A03	23276870	23278847	-	PREDICTED: glucan endo-1,3-beta-glucosidase 14-like [Camelina sativa]
							Bra012603	A03	23305442	23306770	+	PREDICTED: 9-cis-epoxycarotenoid dioxygenase NCED2, chloroplastic [Brassica rapa]
							Bra012602	A03	23309284	23311367	-	PREDICTED: peroxisomal ..S..-2-hydroxy-acid oxidase GLO5 [Brassica rapa]
							Bra012601	A03	23313066	23313410	-	uncharacterized protein LOC106444381 [Brassica napus]
							Bra012600	A03	23315387	23316535	-	TCP2 [Brassica rapa subsp. rapa]
							Bra012599	A03	23323044	23323968	-	PREDICTED: E3 ubiquitin-protein ligase RNF19B-like [Brassica rapa]
							Bra012597	A03	23332920	23333882	-	ras-related protein RABA1e [Brassica napus]
							Bra012596	A03	23335149	23337266	-	uncharacterized protein LOC106375604 [Brassica napus]
							Bra012595	A03	23337781	23339208	-	PREDICTED: magnesium-chelatase subunit ChlI-1, chloroplastic-like [Brassica rapa]
							Bra012594	A03	23340092	23343812	+	PREDICTED: uncharacterized protein At4g18490-like isoform X2 [Brassica rapa]
							Bra012593	A03	23353318	23353554	+	PREDICTED: CLAVATA3..ESR ..CLE..-related protein 2-like [Brassica rapa]
							Bra012592	A03	23357893	23358129	+	BnaA03g58130D [Brassica napus]
							Bra012591	A03	23366900	23368123	-	PREDICTED: pentatricopeptide repeat-containing protein At4g18520 [Brassica rapa]
							Bra012590	A03	23369671	23372052	+	PREDICTED: uncharacterized protein LOC103861001 [Brassica rapa]
							Bra012589	A03	23376061	23376893	+	factor of DNA methylation 5 [Brassica napus]
							Bra012588	A03	23379457	23381516	-	BnaAnng30480D [Brassica napus]
							Bra012587	A03	23382122	23387287	-	PREDICTED: phospholipase A1-IIgamma-like [Brassica rapa]
							Bra012586	A03	23398926	23401869	+	protein CHUP1, chloroplastic-like isoform X2 [Brassica napus]
							Bra012585	A03	23403421	23408434	+	PREDICTED: pollen-specific protein-like At4g18596 [Brassica rapa]
							Bra012582	A03	23448511	23449257	+	PREDICTED: uncharacterized protein LOC103861007 [Brassica rapa]
							Bra012581	A03	23457614	23459115	+	shaggy-like kinase etha [Arabidopsis thaliana]
							Bra012580	A03	23460027	23460952	+	60S ribosomal protein L11-1 [Brassica napus]
							Bra012579	A03	23462221	23463664	+	PREDICTED: transcription factor MYB98-like [Brassica rapa]
							Bra012578	A03	23464101	23467994	-	PREDICTED: cellulose synthase A catalytic subunit 8 [UDP-forming] [Raphanus sativus]
							Bra012577	A03	23468959	23471272	-	PREDICTED: metal transporter Nramp5 [Camelina sativa]
							Bra012576	A03	23472325	23473182	-	BnaC07g50160D [Brassica napus]
							Bra012575	A03	23483838	23485120	+	PREDICTED: transcription repressor OFP5-like isoform X3 [Brassica rapa]
							Bra012574	A03	23487129	23488283	+	PREDICTED: cytosolic Fe-S cluster assembly factor NBP35-like [Brassica rapa]
							Bra012573	A03	23490604	23492543	-	PREDICTED: uncharacterized protein LOC103861172 [Brassica rapa]
							Bra012571	A03	23505791	23507034	-	PREDICTED: heat stress transcription factor A-4a-like [Brassica rapa]
							Bra012570	A03	23511589	23513479	+	BES1..BZR1 homolog protein 3-like isoform X2 [Brassica napus]
							Bra012569	A03	23518885	23519097	+	BnaCnng75830D [Brassica napus]
							Bra012567	A03	23528140	23532627	+	PREDICTED: aquaporin NIP1-2 [Brassica rapa]
							Bra012566	A03	23534075	23535207	+	PREDICTED: oil body-associated protein 2B-like [Brassica rapa]
							Bra012564	A03	23551452	23555429	+	PREDICTED: floral homeotic protein AGAMOUS isoform X3 [Brassica rapa]
							Bra012563	A03	23556541	23558004	-	PREDICTED: GDSL esterase..lipase At4g18970 [Raphanus sativus]
							Bra012561	A03	23568271	23571353	-	BnaC09g36000D [Brassica napus]
							Bra012560	A03	23572557	23572886	+	PREDICTED: uncharacterized protein LOC103861028 [Brassica rapa]
							Bra012559	A03	23574130	23576251	-	PREDICTED: probable xyloglucan endotransglucosylase..hydrolase protein 29 isoform X1 [Brassica rapa]
							Bra012558	A03	23577896	23588667	-	PREDICTED: protein ENHANCED DISEASE RESISTANCE 2-like isoform X1 [Brassica rapa]
							Bra012557	A03	23591496	23593839	-	PREDICTED: probable methyltransferase PMT21 [Brassica rapa]
							Bra012555	A03	23606489	23608041	+	BnaC01g40960D [Brassica napus]
							Bra012554	A03	23608674	23610913	-	PREDICTED: LOW QUALITY PROTEIN: probable apyrase 7 [Brassica rapa]
							Bra012553	A03	23612142	23614915	+	PREDICTED: ABC transporter E family member 2-like [Brassica rapa]
							Bra012552	A03	23615400	23618282	-	PREDICTED: pentatricopeptide repeat-containing protein At4g19220, mitochondrial [Brassica rapa]
							Bra012551	A03	23647356	23649349	+	PREDICTED: abscisic acid 8'-hydroxylase 1 [Brassica rapa]
							Bra012550	A03	23661905	23662967	+	uncharacterized protein LOC111214755 [Brassica napus]
							Bra012549	A03	23664350	23665775	+	PREDICTED: uncharacterized protein LOC103861045 [Brassica rapa]
							Bra012548	A03	23667896	23671699	-	PREDICTED: long-chain-alcohol oxidase FAO4A-like [Brassica rapa]
							Bra012544	A03	23705880	23709189	+	cysteine-rich receptor-like protein kinase 15 [Brassica napus]
							Bra012543	A03	23711466	23714828	+	PREDICTED: protein NUCLEAR FUSION DEFECTIVE 4-like [Brassica rapa]
							Bra012542	A03	23714966	23716408	-	PREDICTED: uncharacterized protein LOC103861177 [Brassica rapa]
							Bra012541	A03	23717282	23721752	-	disease resistance protein LAZ5-like [Brassica napus]
							Bra012540	A03	23721983	23726550	+	disease resistance protein [Brassica rapa subsp. pekinensis]
							Bra012539	A03	23727547	23733908	+	vacuolar protein sorting-associated protein 54, chloroplastic-like [Brassica napus]
							Bra012537	A03	23741113	23742372	-	F-box..kelch-repeat protein At4g19930-like [Brassica napus]
							Bra012536	A03	23743300	23744611	-	E3 ubiquitin-protein ligase ARIH1-like [Brassica napus]
							Bra012535	A03	23747783	23748826	+	PREDICTED: fe..2+.. transport protein 2-like [Brassica rapa]
							Bra012534	A03	23762049	23763245	+	fe..2+.. transport protein 1-like [Brassica napus]
							Bra012533	A03	23767714	23768952	+	fe..2+.. transport protein 1-like [Brassica napus]
							Bra012532	A03	23774420	23775477	-	PREDICTED: E3 ubiquitin-protein ligase BOI-like [Brassica rapa]
							Bra012531	A03	23790671	23793046	-	PREDICTED: lecithin-cholesterol acyltransferase-like 4 [Brassica rapa]
							Bra012530	A03	23793744	23795327	-	uncharacterized protein LOC106421194 isoform X1 [Brassica napus]
							Bra012529	A03	23796396	23797712	+	PREDICTED: F-box protein At4g19940-like [Brassica rapa]
							Bra012526	A03	23818579	23821907	+	PREDICTED: potassium transporter 9-like [Brassica rapa]
							Bra012525	A03	23826492	23833028	+	PREDICTED: potassium transporter 9-like isoform X3 [Brassica rapa]
							Bra012524	A03	23834935	23843744	+	uncharacterized protein At4g15970-like [Brassica napus]
							Bra012523	A03	23847217	23849057	+	PREDICTED: protein OSB2, chloroplastic [Brassica rapa]
							Bra012522	A03	23849354	23851372	-	PREDICTED: multiple organellar RNA editing factor 1, mitochondrial-like [Brassica rapa]
							Bra012521	A03	23852409	23854091	-	polygalacturonase QRT3-like [Brassica napus]
							Bra012520	A03	23858218	23859724	-	polygalacturonase QRT3-like isoform X1 [Brassica napus]
							Bra012519	A03	23881400	23884326	+	allantoate deiminase [Brassica napus]
							Bra012518	A03	23886033	23887608	-	PREDICTED: indoleacetaldoxime dehydratase-like [Brassica rapa]
							Bra012516	A03	23894193	23895071	-	hypothetical protein EUTSA_v10026700mg [Eutrema salsugineum]
							Bra012515	A03	23896125	23898313	-	PREDICTED: putative terpenoid synthase 7 isoform X2 [Brassica rapa]
							Bra012514	A03	23903270	23904816	-	PREDICTED: cytochrome P450 71A16-like [Brassica rapa]
							Bra012513	A03	23914598	23920186	-	PREDICTED: LOW QUALITY PROTEIN: putative terpenoid synthase 7 [Brassica rapa]
							Bra038811	A03	23945876	23947554	+	PREDICTED: plasma membrane-associated cation-binding protein 1-like [Brassica rapa]
							Bra038810	A03	23957026	23959983	+	PREDICTED: leucine-rich repeat receptor-like serine..threonine-protein kinase BAM3 [Brassica rapa]
							Bra038808	A03	23987357	23993560	-	PREDICTED: uncharacterized protein LOC108830708 [Raphanus sativus]
							Bra038807	A03	23998060	24001707	+	PREDICTED: CTP synthase-like isoform X1 [Brassica rapa]
							Bra038805	A03	24006387	24007814	+	PREDICTED: elongation factor Tu, chloroplastic [Raphanus sativus]
							Bra038804	A03	24008770	24009770	+	PREDICTED: protein LSD1-like isoform X2 [Brassica rapa]
							Bra038803	A03	24010510	24010929	+	PREDICTED: uncharacterized protein LOC103861198 [Brassica rapa]
							Bra038802	A03	24011144	24011419	-	PREDICTED: small nuclear ribonucleoprotein-associated protein B'-like [Brassica oleracea var. oleracea]
							Bra038801	A03	24013300	24014350	-	PREDICTED: calcium-binding protein CML42-like [Brassica rapa]
							Bra038800	A03	24015152	24016788	-	PREDICTED: putative leucine-rich repeat receptor-like serine..threonine-protein kinase At2g24130 [Brassica rapa]
							Bra038799	A03	24019500	24021107	+	PREDICTED: reticuline oxidase-like protein [Brassica rapa]
							Bra038798	A03	24024093	24025712	+	PREDICTED: reticuline oxidase-like protein [Brassica oleracea var. oleracea]
							Bra038797	A03	24029080	24037835	-	PREDICTED: tripeptidyl-peptidase 2 [Raphanus sativus]
							Bra038796	A03	24039495	24040244	-	uncharacterized protein LOC106405619 [Brassica napus]
							Bra038794	A03	24045671	24047296	-	protein POLLENLESS 3-like [Brassica napus]
							Bra038793	A03	24049508	24050735	+	PREDICTED: LOW QUALITY PROTEIN: riboflavin biosynthesis protein PYRD, chloroplastic [Brassica oleracea var. oleracea]
							Bra038791	A03	24055290	24056641	+	alpha carbonic anhydrase 4-like isoform X1 [Brassica napus]
							Bra038789	A03	24064183	24064803	+	PREDICTED: dof zinc finger protein DOF4.4-like [Brassica rapa]
							Bra038786	A03	24074763	24075524	+	BnaA03g58540D [Brassica napus]
							Bra038785	A03	24078188	24081398	+	cationic amino acid transporter 1-like [Brassica napus]
							Bra038784	A03	24082923	24087220	+	PREDICTED: dolichyl-diphosphooligosaccharide--protein glycosyltransferase subunit 2-like [Brassica rapa]
							Bra038783	A03	24088192	24089891	+	PREDICTED: ADP-ribosylation factor GTPase-activating protein AGD12-like isoform X2 [Brassica oleracea var. oleracea]
							Bra038782	A03	24090601	24091586	-	PREDICTED: pentatricopeptide repeat-containing protein At4g21190-like isoform X2 [Brassica rapa]
							Bra038781	A03	24100121	24100754	+	COX assembly mitochondrial protein 2 homolog [Brassica napus]
							Bra038780	A03	24105920	24109253	+	gibberellin 2-beta-dioxygenase 8 isoform X1 [Brassica napus]
							Bra038778	A03	24121939	24127447	+	PREDICTED: subtilisin-like protease SBT3.1 [Brassica rapa]
							Bra038777	A03	24131847	24134902	+	PREDICTED: subtilisin-like protease SBT3.12 [Brassica rapa]
							Bra038776	A03	24138243	24142244	-	PREDICTED: cysteine-rich receptor-like protein kinase 29 [Brassica rapa]
							Bra038775	A03	24143814	24147599	-	PREDICTED: lysine-specific demethylase JMJ25-like isoform X1 [Brassica rapa]
							Bra038774	A03	24162509	24163765	-	PREDICTED: transcription factor MYB39-like [Brassica rapa]
							Bra038773	A03	24166740	24167051	+	PREDICTED: glycine-rich protein 5 [Brassica rapa]
							Bra038772	A03	24187673	24187972	+	PREDICTED: uncharacterized protein LOC103861233 [Brassica rapa]
							Bra038771	A03	24189137	24194055	-	PREDICTED: sphingosine kinase 1 isoform X1 [Brassica rapa]
							Bra038769	A03	24199166	24199567	+	PREDICTED: ATP-dependent RNA helicase A [Brassica rapa]
							Bra038768	A03	24199838	24203059	-	PREDICTED: subtilisin-like protease SBT3.13 [Brassica rapa]
							Bra038767	A03	24208207	24216002	-	PREDICTED: S-locus-specific glycoprotein S13-like [Brassica rapa]
							Bra038766	A03	24217318	24220864	-	PREDICTED: subtilisin-like protease SBT3.13 [Brassica rapa]
							Bra038765	A03	24224082	24224555	-	--
							Bra038764	A03	24225333	24229949	+	RNA polymerase II C-terminal domain phosphatase-like 1 [Brassica napus]
							Bra038763	A03	24230588	24232594	-	protein NRT1.. PTR FAMILY 7.2 [Brassica napus]
							Bra038762	A03	24248736	24250267	-	PREDICTED: pentatricopeptide repeat-containing protein At4g21705, mitochondrial [Brassica rapa]
							Bra038760	A03	24257553	24259049	+	uncharacterized protein LOC106399538 [Brassica napus]
							Bra038759	A03	24259586	24260017	+	uncharacterized protein LOC106399716 [Brassica napus]
							Bra038758	A03	24263024	24264157	+	PREDICTED: CRIB domain-containing protein RIC11-like [Brassica rapa]
							Bra038757	A03	24275881	24279414	+	homeobox-leucine zipper protein MERISTEM L1 [Arabidopsis lyrata subsp. lyrata]
							Bra038756	A03	24280484	24283179	+	PREDICTED: beta-glucosidase 47-like [Raphanus sativus]
							Bra038754	A03	24290155	24292149	+	PREDICTED: tobamovirus multiplication protein 1 [Brassica rapa]
							Bra038753	A03	24294019	24295276	-	PREDICTED: peptide methionine sulfoxide reductase B5-like [Brassica rapa]
							Bra038751	A03	24296257	24296659	-	protein COFACTOR ASSEMBLY OF COMPLEX C SUBUNIT B CCB1, chloroplastic [Brassica napus]
							Bra038750	A03	24303342	24304157	-	PREDICTED: uncharacterized protein LOC103861256 [Brassica rapa]
							Bra038749	A03	24306906	24310339	-	PREDICTED: protein TRANSPARENT TESTA 12-like [Brassica oleracea var. oleracea]
							Bra038748	A03	24323537	24327067	-	protein DETOXIFICATION 39 [Eutrema salsugineum]
							Bra038747	A03	24339450	24340813	-	unnamed protein product [Eutrema halophilum]
							Bra019413	A03	24350950	24353977	-	putative disease resistance protein, partial [Brassica rapa subsp. pekinensis]
							Bra019412	A03	24370531	24371199	-	disease resistance-like protein [Brassica rapa subsp. pekinensis]
							Bra019411	A03	24372280	24372516	+	--
							Bra019410	A03	24373815	24379176	-	PREDICTED: disease resistance protein TAO1-like isoform X1 [Brassica rapa]
							Bra019408	A03	24388976	24389449	+	PREDICTED: uncharacterized protein LOC103861270 [Brassica rapa]
							Bra019407	A03	24391878	24392811	+	autophagy-related protein 8a isoform X1 [Brassica napus]
							Bra019406	A03	24393210	24394793	-	5'-adenylylsulfate reductase 3, chloroplastic-like [Brassica napus]
							Bra019405	A03	24403694	24404722	+	F-box protein [Brassica rapa subsp. pekinensis]
							Bra019404	A03	24409283	24411164	-	glutathione S-transferase T3-like [Brassica napus]
							Bra019403	A03	24413728	24415552	-	PREDICTED: uncharacterized protein LOC103861733 isoform X4 [Brassica rapa]
							Bra019402	A03	24429989	24430549	+	F-box protein At1g69090-like [Brassica napus]
							Bra019400	A03	24437662	24439848	-	uncharacterized protein LOC106442609 [Brassica napus]
							Bra019398	A03	24454780	24457677	+	cardosin-E [Brassica napus]
							Bra019396	A03	24501547	24502262	+	PREDICTED: uncharacterized protein LOC108869291 [Brassica rapa]
							Bra019395	A03	24510450	24512273	-	chromatin remodeling protein EBS isoform X1 [Brassica napus]
							Bra019394	A03	24517143	24519546	+	PREDICTED: probable F-box protein At4g22165 [Brassica rapa]
							Bra019393	A03	24520116	24521078	-	uncharacterized protein LOC106356322 [Brassica napus]
							Bra019391	A03	24529596	24530189	-	uncharacterized protein LOC106356321 [Brassica napus]
							Bra019390	A03	24534962	24537043	+	PREDICTED: uncharacterized protein LOC103861292 [Brassica rapa]
							Bra019389	A03	24537824	24543282	-	PREDICTED: isoleucine--tRNA ligase, cytoplasmic-like [Brassica rapa]
							Bra019388	A03	24545980	24549293	-	PREDICTED: F-box protein At4g22280-like [Raphanus sativus]
							Bra019387	A03	24550706	24552579	-	PREDICTED: uncharacterized membrane protein At1g16860-like [Brassica rapa]
							Bra019386	A03	24556073	24557361	-	PREDICTED: probable carboxylesterase SOBER1-like isoform X2 [Brassica rapa]
							Bra019385	A03	24557721	24559089	-	carboxylesterase SOBER1 [Brassica napus]
							Bra019384	A03	24559314	24560346	+	PREDICTED: mitochondrial pyruvate carrier 4 [Raphanus sativus]
							Bra019383	A03	24561027	24562261	-	PREDICTED: uncharacterized protein LOC103861300 [Brassica rapa]
							Bra019382	A03	24565128	24566249	-	PREDICTED: E3 ubiquitin-protein ligase RDUF1 [Brassica rapa]
							Bra019381	A03	24568087	24570531	-	PREDICTED: uncharacterized protein LOC103861301 [Brassica rapa]
							Bra019380	A03	24572023	24572866	+	alkaline ceramidase-like [Brassica napus]
							Bra019379	A03	24573519	24575719	-	U4..U6.U5 tri-snRNP-associated protein 2-like [Brassica napus]
							Bra019378	A03	24576675	24578319	+	PREDICTED: formin-like protein 4 [Brassica rapa]
							Bra019377	A03	24594814	24595185	-	PREDICTED: 14 kDa proline-rich protein DC2.15 [Brassica rapa]
							Bra019376	A03	24598624	24601671	+	PREDICTED: proline-rich extensin-like protein EPR1 [Raphanus sativus]
							Bra019374	A03	24609734	24616800	-	PREDICTED: adenine phosphoribosyltransferase 3 [Raphanus sativus]
							Bra019373	A03	24632761	24633873	+	PREDICTED: protein INAPERTURATE POLLEN1-like [Brassica rapa]
							Bra019372	A03	24637281	24638932	+	protein INAPERTURATE POLLEN1-like [Brassica napus]
							Bra019371	A03	24642879	24644065	+	PREDICTED: protein INAPERTURATE POLLEN1-like [Brassica rapa]
							Bra019370	A03	24644437	24646054	-	PREDICTED: probable trehalose-phosphate phosphatase G [Brassica rapa]
							Bra019369	A03	24676262	24676720	+	PREDICTED: auxin-responsive protein SAUR32-like [Brassica rapa]
							Bra019368	A03	24683786	24685070	-	PREDICTED: protein ODORANT1-like [Brassica rapa]
							Bra019366	A03	24701345	24702922	+	PREDICTED: geraniol 8-hydroxylase-like [Brassica rapa]
							Bra019364	A03	24712058	24712660	+	PREDICTED: LOB domain-containing protein 32-like [Brassica oleracea var. oleracea]
							Bra019363	A03	24714374	24717092	+	protein LATERAL ORGAN BOUNDARIES-like [Brassica napus]
							Bra019362	A03	24723505	24724886	-	myeloid leukemia factor 1-like [Brassica napus]
							Bra019361	A03	24725840	24727726	-	PREDICTED: probable protein S-acyltransferase 13 [Brassica rapa]
							Bra019359	A03	24743369	24744819	-	PREDICTED: AT-hook motif nuclear-localized protein 2-like [Brassica rapa]
							Bra019358	A03	24746332	24747966	+	BnaA03g53280D [Brassica napus]
							Bra019357	A03	24751853	24754052	-	PREDICTED: ACT domain-containing protein ACR7-like [Brassica rapa]
							Bra019356	A03	24763163	24764680	-	protein DETOXIFICATION 56-like [Brassica napus]
							Bra019355	A03	24775401	24776384	+	PREDICTED: AT-hook motif nuclear-localized protein 24 [Brassica rapa]
							Bra019354	A03	24779545	24783194	-	PREDICTED: zinc finger A20 and AN1 domain-containing stress-associated protein 9 [Brassica rapa]
							Bra019353	A03	24783993	24787162	-	PREDICTED: uncharacterized protein LOC108868762 isoform X1 [Brassica rapa]
							Bra019352	A03	24788421	24790229	-	PREDICTED: probable sodium..metabolite cotransporter BASS6, chloroplastic [Brassica rapa]
							Bra019351	A03	24792668	24795946	+	PREDICTED: protein TPX2-like [Brassica rapa]
							Bra019350	A03	24796232	24797395	-	PREDICTED: leucoanthocyanidin dioxygenase-like [Raphanus sativus]
							Bra019349	A03	24798484	24800142	+	PREDICTED: PGR5-like protein 1A, chloroplastic isoform X1 [Brassica rapa]
							Bra019348	A03	24801605	24802621	+	PREDICTED: uncharacterized protein LOC103861344 [Brassica rapa]
							Bra019347	A03	24806636	24809264	+	PREDICTED: protein FIZZY-RELATED 2 [Brassica rapa]
							Bra019346	A03	24810238	24811362	-	protein STAY-GREEN 1, chloroplastic-like [Brassica napus]
							Bra019344	A03	24813984	24815643	+	dihydroorotase, mitochondrial isoform X1 [Eutrema salsugineum]
							Bra019343	A03	24816509	24820969	-	agamous-like MADS-box protein AGL19 [Brassica napus]
							Bra019341	A03	24840040	24844413	+	PREDICTED: uncharacterized protein LOC103861350 [Brassica rapa]
							Bra019340	A03	24844735	24846993	-	UDP-galactose..UDP-glucose transporter 2 [Sesamum indicum]
							Bra019339	A03	24855183	24856572	+	protein DETOXIFICATION 49 [Brassica napus]
							Bra019338	A03	24861185	24864615	+	PREDICTED: mitogen-activated protein kinase kinase kinase MLK4 [Brassica rapa]
							Bra019337	A03	24870322	24872877	+	PREDICTED: protein IQ-DOMAIN 14-like [Brassica rapa]
							Bra019336	A03	24882137	24882370	+	BnaA02g27440D [Brassica napus]
							Bra019335	A03	24884043	24885732	+	PREDICTED: autophagy-related protein 11-like isoform X1 [Brassica rapa]
							Bra019334	A03	24936413	24937020	+	PREDICTED: LOW QUALITY PROTEIN: uncharacterized protein LOC103861752 [Brassica rapa]
							Bra019333	A03	24939266	24941783	-	PREDICTED: glutamate--cysteine ligase, chloroplastic-like [Brassica rapa]
							Bra019332	A03	24947386	24950380	-	PREDICTED: glutamate--cysteine ligase, chloroplastic-like [Brassica rapa]
							Bra019329	A03	24964682	24967321	-	PREDICTED: cysteine-rich receptor-like protein kinase 5 [Brassica rapa]
							Bra019328	A03	24970105	24970701	+	PREDICTED: acidic repeat-containing protein-like [Brassica rapa]
							Bra019327	A03	24972879	24973805	+	BnaA03g45750D [Brassica napus]
							Bra019325	A03	24993388	24994298	-	BnaA03g45800D [Brassica napus]
							Bra019324	A03	24995374	24997846	-	PREDICTED: cysteine-rich receptor-like protein kinase 5 [Brassica rapa]
							Bra019323	A03	25007715	25011058	+	PREDICTED: cysteine-rich receptor-like protein kinase 15 isoform X2 [Brassica rapa]
							Bra019322	A03	25013855	25016331	+	PREDICTED: cysteine-rich receptor-like protein kinase 10 [Brassica rapa]
							Bra019321	A03	25017039	25019288	-	PREDICTED: cysteine-rich receptor-like protein kinase 15 [Brassica oleracea var. oleracea]
							Bra019320	A03	25021046	25023625	-	PREDICTED: cysteine-rich receptor-like protein kinase 15 [Brassica rapa]
							Bra019319	A03	25024390	25028706	-	BnaA03g45830D [Brassica napus]
							Bra019318	A03	25030316	25032370	+	uncharacterized protein LOC111199670 [Brassica napus]
							Bra019317	A03	25041033	25045347	-	uncharacterized protein LOC111203191 [Brassica napus]
							Bra019316	A03	25051056	25053602	-	PREDICTED: cysteine-rich receptor-like protein kinase 17 [Brassica rapa]
							Bra019315	A03	25056215	25058776	-	PREDICTED: cysteine-rich receptor-like protein kinase 17 [Brassica rapa]
							Bra019314	A03	25062794	25065885	-	PREDICTED: cysteine-rich receptor-like protein kinase 24 isoform X1 [Brassica rapa]
							Bra019313	A03	25066741	25070437	+	PREDICTED: cysteine-rich receptor-like protein kinase 11 isoform X1 [Brassica rapa]
							Bra019312	A03	25071749	25075217	+	eukaryotic translation initiation factor 3 subunit A isoform X2 [Brassica napus]
							Bra019310	A03	25078620	25079177	-	PREDICTED: probable 2-oxoglutarate-dependent dioxygenase AOP1 [Brassica rapa]
							Bra019309	A03	25080874	25085257	-	PREDICTED: uncharacterized protein LOC103861393 [Brassica rapa]
							Bra019307	A03	25092063	25093184	+	BnaA03g45950D [Brassica napus]
							Bra019306	A03	25094817	25095848	+	tetraspanin-5-like [Brassica napus]
							Bra019305	A03	25101681	25104380	+	PREDICTED: uncharacterized protein LOC103861386 [Brassica rapa]
							Bra019304	A03	25104717	25108027	-	PREDICTED: F-box protein At3g28330-like [Brassica rapa]
							Bra019302	A03	25113080	25117499	-	PREDICTED: beta-adaptin-like protein C [Brassica rapa]
							Bra019301	A03	25117978	25119463	+	PREDICTED: uncharacterized protein LOC103861399 [Brassica rapa]
							Bra019300	A03	25119915	25122196	-	PREDICTED: uncharacterized protein LOC104722667 isoform X2 [Camelina sativa]
							Bra019299	A03	25134768	25138410	+	PREDICTED: probable polygalacturonase, partial [Tarenaya hassleriana]
							Bra019298	A03	25143181	25144242	+	PREDICTED: uncharacterized protein LOC103861402 [Brassica rapa]
							Bra019297	A03	25153454	25154701	+	PREDICTED: probable WRKY transcription factor 29 [Brassica rapa]
							Bra019296	A03	25155826	25158340	-	BnaA03g46040D [Brassica napus]
							Bra019295	A03	25168879	25170765	+	protein SGT1 homolog A [Brassica napus]
							Bra019294	A03	25179834	25181809	+	PREDICTED: probable aminotransferase TAT4 [Raphanus sativus]
							Bra019292	A03	25213097	25214431	+	uncharacterized protein LOC106441966 [Brassica napus]
							Bra019290	A03	25226459	25227937	+	PREDICTED: MAR-binding filament-like protein 1 [Brassica rapa]
							Bra019289	A03	25228306	25232104	-	PREDICTED: probable sulfate transporter 3.4 [Raphanus sativus]
							Bra019288	A03	25235578	25236090	+	PREDICTED: uncharacterized protein LOC106314149 [Brassica oleracea var. oleracea]
							Bra019287	A03	25240511	25242053	-	PREDICTED: uncharacterized protein LOC103861765 [Brassica rapa]
							Bra019285	A03	25275954	25277128	+	PREDICTED: reticulon-like protein B1 [Brassica rapa]
							Bra019283	A03	25286608	25288397	-	PREDICTED: 4-hydroxybenzoate polyprenyltransferase, mitochondrial-like isoform X2 [Brassica rapa]
							Bra019281	A03	25299461	25301924	-	calcium-dependent protein kinase 1 [Carica papaya]
							Bra019279	A03	25311852	25312232	+	probable protein phosphatase 2C 39 [Brassica napus]
							Bra019277	A03	25319404	25319967	-	PREDICTED: dirigent protein 6 [Brassica rapa]
							Bra019276	A03	25322119	25325401	-	PREDICTED: cation..H..+.. antiporter 17 [Brassica rapa]
							Bra019275	A03	25330371	25330934	+	V-type proton ATPase subunit G2-like [Brassica napus]
							Bra019274	A03	25340237	25341187	+	PREDICTED: uncharacterized protein LOC103861432 [Brassica rapa]
							Bra019273	A03	25345715	25352019	-	PREDICTED: putative disease resistance protein At4g11170 [Brassica rapa]
							Bra019271	A03	25361026	25362161	+	PREDICTED: probable inactive receptor kinase At4g23740 [Ricinus communis]
							Bra019270	A03	25376708	25377640	+	PREDICTED: ethylene-responsive transcription factor CRF2 [Brassica rapa]
							Bra019269	A03	25383594	25383935	-	PREDICTED: methylsterol monooxygenase 1-2 [Raphanus sativus]
							Bra019268	A03	25384385	25385371	-	PREDICTED: probable long-chain-alcohol O-fatty-acyltransferase 9 [Brassica rapa]
							Bra019267	A03	25394974	25395455	+	uncharacterized protein LOC106441960, partial [Brassica napus]
							Bra019266	A03	25397211	25399301	+	PREDICTED: protein trichome birefringence-like 24 [Brassica rapa]
							Bra019265	A03	25399965	25401133	-	probable WRKY transcription factor 53 [Brassica napus]
							Bra019264	A03	25407839	25410646	-	PREDICTED: probable polygalacturonase [Brassica oleracea var. oleracea]
							Bra019263	A03	25412233	25414739	+	PREDICTED: uncharacterized protein LOC103861441 [Brassica rapa]
							Bra019262	A03	25416592	25416939	+	PREDICTED: uncharacterized protein LOC103861442 [Brassica rapa]
							Bra019261	A03	25417853	25418455	-	PREDICTED: uncharacterized protein LOC103861443 [Brassica rapa]
							Bra019260	A03	25421336	25421792	+	uncharacterized protein LOC106438444 isoform X2 [Brassica napus]
							Bra019259	A03	25422083	25422814	-	PREDICTED: NAD..P..H-quinone oxidoreductase subunit S, chloroplastic-like [Brassica rapa]
							Bra019258	A03	25423963	25425220	+	PREDICTED: uncharacterized protein LOC103861447 isoform X4 [Brassica rapa]
							Bra019257	A03	25432549	25434787	+	PREDICTED: UDP-glucose 4-epimerase 2-like [Camelina sativa]
							Bra019256	A03	25435335	25435925	-	uncharacterized protein BNAA03G46360D [Brassica napus]
							Bra019255	A03	25446636	25449715	+	auxin response factor 9 [Brassica rapa subsp. pekinensis]
							Bra019253	A03	25457100	25459763	+	PREDICTED: cellulose synthase-like protein G3 isoform X1 [Brassica rapa]
							Bra019252	A03	25460224	25461298	-	BnaA03g46400D [Brassica napus]
							Bra019251	A03	25473868	25477572	+	PREDICTED: protein NLP7-like [Brassica rapa]
MLL	qMLL-5	A04	A4S49-A4S27	91.16-97.85	6.69	11343471-12261503	Bra032087	A04	11345899	11346528	-	PREDICTED: uncharacterized protein LOC103864643 [Brassica rapa]
							Bra032086	A04	11347905	11348537	-	PREDICTED: RING-H2 finger protein ATL67-like [Brassica rapa]
							Bra032085	A04	11350595	11351556	-	PREDICTED: uncharacterized protein LOC103864560 [Brassica rapa]
							Bra032084	A04	11354399	11355814	-	probable WRKY transcription factor 17 isoform X1 [Brassica napus]
							Bra032083	A04	11369864	11371105	-	PREDICTED: probable sarcosine oxidase [Brassica rapa]
							Bra032082	A04	11374775	11380704	+	serine..arginine-rich splicing factor RSZ22A-like [Brassica napus]
							Bra032081	A04	11383157	11386389	+	probable cyclic nucleotide-gated ion channel 14 [Brassica napus]
							Bra032080	A04	11387948	11391323	-	PREDICTED: ubiquitin carboxyl-terminal hydrolase 19 [Brassica rapa]
							Bra032078	A04	11397236	11398673	-	PREDICTED: B3 domain-containing protein REM14-like [Brassica rapa]
							Bra032077	A04	11401867	11403862	-	PREDICTED: B3 domain-containing protein REM14-like [Brassica rapa]
							Bra032076	A04	11411705	11413437	-	BnaA04g14590D [Brassica napus]
							Bra032075	A04	11418252	11427980	-	PREDICTED: putative B3 domain-containing protein REM15 isoform X3 [Brassica rapa]
							Bra032074	A04	11434299	11435902	-	PREDICTED: B3 domain-containing protein REM10-like [Brassica rapa]
							Bra032073	A04	11447742	11450020	+	PREDICTED: glutamate receptor 2.2-like isoform X1 [Brassica rapa]
							Bra032072	A04	11451308	11455016	-	PREDICTED: glutamate receptor 2.2-like isoform X2 [Brassica rapa]
							Bra032071	A04	11462288	11463440	-	BnaC03g30620D [Brassica napus]
							Bra032069	A04	11467131	11468556	+	PREDICTED: F-box..kelch-repeat protein At1g64840-like [Brassica rapa]
							Bra032068	A04	11475244	11487827	+	PREDICTED: F-box..kelch-repeat protein At1g64840-like isoform X1 [Brassica rapa]
							Bra032067	A04	11492323	11493649	+	PREDICTED: F-box..kelch-repeat protein At1g64840-like [Brassica rapa]
							Bra032066	A04	11499863	11501127	+	F-box..kelch-repeat protein At2g24250-like [Brassica napus]
							Bra032064	A04	11523152	11524348	+	PREDICTED: F-box..kelch-repeat protein At1g64840-like [Brassica rapa]
							Bra032061	A04	11540436	11541378	+	PREDICTED: zinc finger protein CONSTANS-LIKE 3 [Brassica rapa]
							Bra032060	A04	11542218	11542694	-	BnaA04g14650D [Brassica napus]
							Bra032059	A04	11544020	11547015	-	eukaryotic translation initiation factor 3 subunit B-like isoform X1 [Brassica napus]
							Bra032058	A04	11561963	11570135	-	PREDICTED: LRR receptor-like serine..threonine-protein kinase GSO2 isoform X1 [Brassica rapa]
							Bra032057	A04	11571599	11572141	+	PREDICTED: agamous-like MADS-box protein AGL61 [Brassica rapa]
							Bra032056	A04	11573428	11574131	-	PREDICTED: uncharacterized protein LOC103864590 [Brassica rapa]
							Bra032055	A04	11575935	11576237	+	PREDICTED: probable steroid-binding protein 3 [Brassica rapa]
							Bra032054	A04	11577513	11580531	+	PREDICTED: L10-interacting MYB domain-containing protein [Brassica rapa]
							Bra032053	A04	11581471	11582797	+	L10-interacting MYB domain-containing protein-like [Brassica napus]
							Bra032051	A04	11600608	11603174	+	PREDICTED: serine..threonine-protein kinase RIO1 [Brassica rapa]
							Bra032050	A04	11606262	11607407	+	PREDICTED: NF-kappa-B-activating protein-like [Brassica rapa]
							Bra032048	A04	11610569	11611327	+	PREDICTED: putative E3 ubiquitin-protein ligase SINA-like 9 [Brassica rapa]
							Bra032047	A04	11612095	11614055	+	PREDICTED: serine..threonine-protein phosphatase 7 long form homolog isoform X2 [Brassica rapa]
							Bra032046	A04	11614223	11615232	-	PREDICTED: uncharacterized protein LOC103837637 [Brassica rapa]
							Bra032045	A04	11617272	11620958	+	PREDICTED: disease resistance protein RML1B-like [Brassica rapa]
							Bra032044	A04	11641116	11644599	+	chaperone protein ClpB4, mitochondrial-like [Brassica napus]
							Bra032043	A04	11645959	11647520	-	PREDICTED: probable protein phosphatase 2C 21 [Brassica rapa]
							Bra032042	A04	11659330	11661682	-	PREDICTED: CBL-interacting serine..threonine-protein kinase 16 [Brassica rapa]
							Bra032040	A04	11677108	11678633	-	PREDICTED: ribonuclease H2 subunit A isoform X1 [Brassica rapa]
							Bra032039	A04	11680993	11683635	-	PREDICTED: receptor-like protein 12 [Brassica rapa]
							Bra032038	A04	11687185	11688808	+	PREDICTED: stromal cell-derived factor 2-like protein [Brassica rapa]
							Bra032037	A04	11695852	11700926	+	PREDICTED: potassium channel AKT1 [Brassica rapa]
							Bra032036	A04	11715088	11715795	+	PREDICTED: putative FBD-associated F-box protein At5g56700 isoform X1 [Brassica rapa]
							Bra032035	A04	11718757	11721358	-	PREDICTED: two-component response regulator ARR12 isoform X1 [Brassica rapa]
							Bra032034	A04	11726199	11727202	+	BnaA04g14770D [Brassica napus]
							Bra032033	A04	11728924	11729172	+	PREDICTED: 60S ribosomal protein L39-1 [Raphanus sativus]
							Bra032032	A04	11730235	11733002	-	PREDICTED: probable receptor-like protein kinase At1g80640 [Brassica rapa]
							Bra032030	A04	11741793	11743765	-	hydroxyproline O-arabinosyltransferase 2 [Eutrema salsugineum]
							Bra032029	A04	11745086	11746635	-	PREDICTED: protein MEMO1-like [Brassica rapa]
							Bra034250	A04	11769505	11769999	-	putative ethylene-responsive transcription factor ERF121 [Brassica napus]
							Bra034251	A04	11774095	11780039	-	PREDICTED: uncharacterized protein LOC103864665 isoform X2 [Brassica rapa]
							Bra034252	A04	11785239	11787188	+	PREDICTED: putative clathrin assembly protein At2g25430 [Brassica rapa]
							Bra034253	A04	11793994	11797877	+	brassinosteroid LRR receptor kinase-like [Brassica napus]
							Bra034254	A04	11799135	11801212	-	PREDICTED: EIN3-binding F-box protein 1 [Brassica rapa]
							Bra034255	A04	11806054	11806788	-	PREDICTED: BAHD acyltransferase At3g29680-like isoform X3 [Brassica rapa]
							Bra034256	A04	11819020	11820057	+	PREDICTED: probable sugar phosphate..phosphate translocator At2g25520 [Brassica rapa]
							Bra034257	A04	11822901	11825974	-	PREDICTED: G-type lectin S-receptor-like serine..threonine-protein kinase At1g11280 [Brassica rapa]
							Bra034258	A04	11828116	11829975	+	PREDICTED: uncharacterized protein LOC103864672 [Brassica rapa]
							Bra034259	A04	11839955	11840551	-	PREDICTED: RING-H2 finger protein ATL60-like [Brassica rapa]
							Bra034260	A04	11852714	11853754	+	PREDICTED: F-box..kelch-repeat protein At2g44700-like [Brassica rapa]
							Bra034261	A04	11861517	11862554	+	F-box..kelch-repeat protein At2g44700-like [Brassica napus]
							Bra034262	A04	11867317	11868351	+	BnaA04g14990D [Brassica napus]
							Bra034263	A04	11869147	11870279	+	PREDICTED: uncharacterized protein LOC103864680 isoform X1 [Brassica rapa]
							Bra034264	A04	11871298	11871591	-	PREDICTED: uncharacterized protein LOC103864682 [Brassica rapa]
							Bra034265	A04	11873055	11875854	+	PREDICTED: uncharacterized protein LOC103864683 [Brassica rapa]
							Bra034266	A04	11876399	11878669	+	FT-interacting protein 1-like [Brassica napus]
							Bra034267	A04	11878917	11888445	-	PREDICTED: uncharacterized protein LOC103864684 [Brassica rapa]
							Bra034268	A04	11905117	11906059	-	mitochondrial fission 1 protein A-like [Brassica napus]
							Bra034269	A04	11910076	11912669	+	PREDICTED: uncharacterized protein LOC103864686 [Brassica rapa]
							Bra034270	A04	11917438	11921026	-	PREDICTED: uncharacterized protein LOC103864688 [Brassica rapa]
							Bra034271	A04	11930123	11931805	+	PREDICTED: aquaporin TIP4-1 [Brassica rapa]
							Bra034272	A04	11931986	11933818	-	PREDICTED: putative pentatricopeptide repeat-containing protein At5g40405 [Camelina sativa]
							Bra034273	A04	11937228	11937839	+	PREDICTED: ethylene-responsive transcription factor ERF042 [Brassica rapa]
							Bra034274	A04	11946303	11947977	-	PREDICTED: probable transcriptional regulatory protein At2g25830 [Brassica rapa]
							Bra034275	A04	11948661	11951114	-	PREDICTED: zinc finger BED domain-containing protein RICESLEEPER 2-like [Brassica oleracea var. oleracea]
							Bra034277	A04	11965099	11967750	+	BnaA04g15180D [Brassica napus]
							Bra034278	A04	11968445	11971351	-	PREDICTED: receptor-like protein 12 [Brassica rapa]
							Bra034279	A04	11973086	11976101	+	PREDICTED: uncharacterized protein LOC103864697 [Brassica rapa]
							Bra034280	A04	11977127	11977567	+	oleosin 1 [Brassica napus]
							Bra034281	A04	11980216	11982791	+	PREDICTED: probable cyclic nucleotide-gated ion channel 12 [Brassica rapa]
							Bra034283	A04	12005692	12007921	-	piRNA biogenesis protein EXD1 isoform X2 [Brassica napus]
							Bra034284	A04	12009541	12012674	+	PREDICTED: protein EARLY FLOWERING 3 [Brassica rapa]
							Bra034285	A04	12013531	12016295	-	PREDICTED: putative protease Do-like 3, mitochondrial [Brassica rapa]
							Bra034287	A04	12025037	12026743	+	PITH domain-containing protein 1-like [Brassica napus]
							Bra034288	A04	12032241	12035856	-	far upstream element-binding protein 1-like [Brassica napus]
							Bra034289	A04	12048887	12050810	-	PREDICTED: probable beta-1,3-galactosyltransferase 12 [Brassica rapa]
							Bra034290	A04	12060364	12061323	+	PREDICTED: 50S ribosomal protein HLL, mitochondrial-like isoform X1 [Brassica rapa]
							Bra034292	A04	12067660	12068833	+	PREDICTED: probable E3 ubiquitin-protein ligase RNF144A [Brassica rapa]
							Bra034293	A04	12077799	12080568	-	PREDICTED: ATP-dependent zinc metalloprotease FTSH 4, mitochondrial [Brassica rapa]
							Bra034295	A04	12086103	12088141	-	PREDICTED: IQ domain-containing protein IQM4 [Brassica rapa]
							Bra034296	A04	12092803	12095796	+	PREDICTED: uncharacterized protein LOC103864719 [Brassica rapa]
							Bra034297	A04	12096801	12098983	-	BnaA04g15370D [Brassica napus]
							Bra034298	A04	12102013	12104345	-	BnaA04g15380D [Brassica napus]
							Bra034299	A04	12115920	12118463	+	PREDICTED: uncharacterized protein LOC103864725 [Brassica rapa]
							Bra034300	A04	12118804	12120364	-	PREDICTED: polyadenylate-binding protein-interacting protein 7 [Brassica rapa]
							Bra034301	A04	12133454	12134153	-	BnaA01g19310D [Brassica napus]
							Bra034302	A04	12135208	12137789	-	probable serine..threonine-protein kinase PBL12 [Brassica napus]
							Bra034303	A04	12146583	12157136	+	BnaA05g16300D [Brassica napus]
							Bra034304	A04	12162750	12164551	+	PREDICTED: fatty-acid-binding protein 2 [Brassica rapa]
							Bra034305	A04	12165292	12166660	-	PREDICTED: S-adenosylmethionine mitochondrial carrier protein [Brassica rapa]
							Bra034306	A04	12177060	12179108	+	fe..3+..-Zn..2+.. purple acid phosphatase 12 [Eutrema salsugineum]
							Bra034307	A04	12182786	12184842	+	fe..3+..-Zn..2+.. purple acid phosphatase 12 [Brassica napus]
							Bra034308	A04	12185614	12187557	-	PREDICTED: protein WEAK CHLOROPLAST MOVEMENT UNDER BLUE LIGHT 1 [Brassica rapa]
							Bra034309	A04	12190546	12192602	-	PREDICTED: bifunctional epoxide hydrolase 2-like [Brassica rapa]
							Bra034310	A04	12194811	12196160	+	PREDICTED: uncharacterized protein LOC103864738 [Brassica rapa]
							Bra034311	A04	12199636	12202407	+	PREDICTED: probable inactive receptor kinase At2g26730 [Brassica rapa]
							Bra034312	A04	12206495	12208878	+	PREDICTED: protein kinase PINOID 2 [Brassica rapa]
							Bra034313	A04	12214782	12217442	-	hypothetical protein AALP_AA6G245200 [Arabis alpina]
							Bra034314	A04	12222601	12228901	+	PREDICTED: ABC transporter G family member 32 [Tarenaya hassleriana]
							Bra034315	A04	12229562	12231986	-	PREDICTED: CBL-interacting serine..threonine-protein kinase 3 [Raphanus sativus]
							Bra034316	A04	12233487	12235143	-	PREDICTED: proteasome subunit alpha type-3 [Raphanus sativus]
							Bra034317	A04	12236554	12238448	+	BnaA04g15550D [Brassica napus]
							Bra034318	A04	12239110	12243733	-	argonaute 4 [Brassica rapa subsp. pekinensis]
							Bra034319	A04	12246326	12249188	-	PREDICTED: GDSL esterase..lipase At5g45920 [Brassica rapa]
							Bra034320	A04	12251723	12253668	+	PREDICTED: GDSL esterase..lipase At5g45910 [Brassica rapa]
							Bra034321	A04	12256926	12257708	+	PREDICTED: NDR1..HIN1-Like protein 3 [Brassica rapa]
	qNNL-3	A04	A4S14-A4S31	47.08-50.39	3.31	14746829-15029077	Bra021812	A04	14750006	14750682	+	small ubiquitin-related modifier 5-like [Brassica napus]
							Bra021813	A04	14751804	14753809	+	BnaA04g19050D [Brassica napus]
							Bra021814	A04	14758080	14763503	-	PREDICTED: beta-galactosidase 9 [Brassica rapa]
							Bra021815	A04	14765737	14768925	+	PREDICTED: beta-glucosidase 33 [Raphanus sativus]
							Bra021817	A04	14773130	14775291	-	PREDICTED: zinc finger CCCH domain-containing protein 26-like [Brassica rapa]
							Bra021818	A04	14786203	14787512	+	e3 ubiquitin-protein ligase cop1 [Arabis alpina]
							Bra021819	A04	14798995	14801844	+	BnaA04g19120D [Brassica napus]
							Bra021820	A04	14802709	14803590	-	BnaA04g19130D [Brassica napus]
							Bra021821	A04	14809420	14812361	+	PREDICTED: LOW QUALITY PROTEIN: endoglucanase 11 [Tarenaya hassleriana]
							Bra021824	A04	14834022	14836685	-	PREDICTED: receptor-like protein 12 [Brassica rapa]
							Bra021826	A04	14840054	14841819	-	ATP synthase subunit gamma, mitochondrial [Citrus clementina]
							Bra021827	A04	14843708	14847296	-	BnaA04g19160D [Brassica napus]
							Bra021828	A04	14847980	14849534	-	PREDICTED: vesicle-associated membrane protein 722-like [Raphanus sativus]
							Bra021830	A04	14862817	14864273	+	exopolygalacturonase-like [Brassica napus]
							Bra021831	A04	14868119	14874536	-	PREDICTED: probable leucine-rich repeat receptor-like protein kinase At2g33170 [Brassica rapa]
							Bra021832	A04	14877825	14878300	+	PREDICTED: uncharacterized protein LOC103865249 [Brassica rapa]
							Bra021833	A04	14880580	14881689	+	PREDICTED: putative F-box protein At4g22660 [Brassica rapa]
							Bra021835	A04	14887756	14891593	-	BnaA04g19250D [Brassica napus]
							Bra021836	A04	14894482	14897736	-	BnaA04g19270D [Brassica napus]
							Bra021837	A04	14898336	14900776	+	haloacid dehalogenase-like hydrolase domain-containing protein At2g33255 [Brassica napus]
							Bra021838	A04	14901688	14903002	+	thioredoxin-like 1-3, chloroplastic [Brassica napus]
							Bra021839	A04	14905220	14907063	+	PREDICTED: probable folate-biopterin transporter 9, chloroplastic isoform X1 [Brassica rapa]
							Bra021840	A04	14912426	14914398	+	histone-lysine N-methyltransferase family member SUVH2-like [Brassica napus]
							Bra021841	A04	14915627	14918146	-	PREDICTED: protein CHROMATIN REMODELING 35 [Brassica rapa]
							Bra021842	A04	14920244	14922475	+	PREDICTED: receptor-like protein 12 [Brassica rapa]
							Bra021843	A04	14923035	14924870	-	PREDICTED: uncharacterized protein LOC103865261 [Brassica rapa]
							Bra021844	A04	14925727	14929035	-	PREDICTED: pre-mRNA-processing factor 19 homolog 2 [Brassica rapa]
							Bra021845	A04	14940347	14940686	-	PREDICTED: uncharacterized protein LOC106341978 isoform X2 [Brassica oleracea var. oleracea]
							Bra021846	A04	14951736	14953447	+	PREDICTED: zinc finger protein CONSTANS-LIKE 12-like isoform X2 [Brassica rapa]
							Bra021847	A04	14954402	14956354	-	probable peroxygenase 3 [Brassica napus]
							Bra021848	A04	14961932	14962189	+	uncharacterized protein LOC106447156 [Brassica napus]
							Bra021849	A04	14963290	14964448	-	PREDICTED: serine..threonine-protein kinase rio2-like [Brassica rapa]
							Bra021850	A04	14966429	14967617	+	PREDICTED: heterogeneous nuclear ribonucleoprotein 1-like [Brassica rapa]
							Bra021851	A04	14968459	14972388	+	PREDICTED: uncharacterized protein LOC103865268 [Brassica rapa]
							Bra021852	A04	14973338	14974838	+	multiple organellar RNA editing factor 2, chloroplastic-like [Brassica napus]
							Bra021853	A04	14975473	14976290	+	50S ribosomal protein L28, chloroplastic-like [Brassica napus]
							Bra021854	A04	14976459	14977284	-	PREDICTED: CRIB domain-containing protein RIC1-like isoform X1 [Brassica rapa]
							Bra021855	A04	14978191	14979673	-	glycolipid transfer protein 1 [Brassica napus]
							Bra021856	A04	14984350	14985272	+	BnaA04g19530D [Brassica napus]
							Bra021857	A04	14989560	14990483	+	putative F-box protein At1g47800 [Brassica napus]
							Bra021858	A04	14993545	14999426	+	PREDICTED: uncharacterized protein At2g33490-like isoform X1 [Brassica rapa]
							Bra021859	A04	15008602	15009827	+	PREDICTED: FACT complex subunit SPT16-like [Brassica rapa]
							Bra021860	A04	15015629	15016958	-	PREDICTED: trihelix transcription factor ASR3 [Brassica rapa]
							Bra021861	A04	15018935	15023059	-	PREDICTED: mitotic spindle checkpoint protein BUBR1-like isoform X2 [Raphanus sativus]
							Bra021862	A04	15024408	15024757	-	PREDICTED: uncharacterized protein LOC103865282 [Brassica rapa]
							Bra021863	A04	15025152	15026633	+	PREDICTED: cinnamoyl-CoA reductase 1 [Brassica rapa]
	qNAL-2	A05	A5S62-A5S13	41.19-50.52	9.33	20345543-22060888	Bra027198	A05	20363672	20368327	+	PREDICTED: TSA1-like protein isoform X5 [Brassica rapa]
							Bra027200	A05	20373982	20375887	+	PREDICTED: uncharacterized protein LOC103869865 [Brassica rapa]
							Bra027201	A05	20376774	20377939	-	PREDICTED: delta-9 acyl-lipid desaturase 1-like, partial [Brassica rapa]
							Bra027202	A05	20381605	20382105	+	PREDICTED: uncharacterized protein LOC103869866 [Brassica rapa]
							Bra027203	A05	20407606	20409476	-	PREDICTED: palmitoyl-monogalactosyldiacylglycerol delta-7 desaturase, chloroplastic [Brassica rapa]
							Bra027204	A05	20410130	20411629	+	PREDICTED: uncharacterized protein LOC103869869 [Brassica rapa]
							Bra027205	A05	20422088	20424034	-	PREDICTED: phosphatidylcholine:diacylglycerol cholinephosphotransferase 1-like [Brassica rapa]
							Bra027206	A05	20428123	20429066	+	PREDICTED: protein LURP-one-related 12-like isoform X1 [Raphanus sativus]
							Bra027207	A05	20429987	20434941	-	uncharacterized protein LOC106404650 [Brassica napus]
							Bra027208	A05	20435713	20436200	-	uncharacterized protein LOC106403029 [Brassica napus]
							Bra027209	A05	20440241	20443269	-	hypothetical protein EUTSA_v10020083mg [Eutrema salsugineum]
							Bra027210	A05	20448066	20450152	+	PREDICTED: probable polygalacturonase At3g15720 isoform X1 [Brassica rapa]
							Bra027212	A05	20455781	20456891	-	putative F-box protein At3g17620 isoform X1 [Brassica napus]
							Bra027214	A05	20464888	20466082	+	PREDICTED: signal peptidase complex catalytic subunit SEC11C-like [Brassica rapa]
							Bra027215	A05	20466332	20467612	-	hypothetical protein EUTSA_v10020754mg [Eutrema salsugineum]
							Bra027217	A05	20479169	20481091	-	PREDICTED: uncharacterized protein LOC103869887 [Brassica rapa]
							Bra027218	A05	20487882	20489485	+	BnaA05g26580D [Brassica napus]
							Bra027219	A05	20495510	20496286	+	late embryogenesis abundant protein 29-like [Brassica napus]
							Bra027220	A05	20498763	20499852	+	monothiol glutaredoxin-S15, mitochondrial [Brassica napus]
							Bra027221	A05	20500131	20501659	-	acyl-protein thioesterase 2 isoform X2 [Capsella rubella]
							Bra027223	A05	20510475	20511803	-	PREDICTED: cytochrome c oxidase subunit 5b-1, mitochondrial-like isoform X7 [Brassica rapa]
							Bra027224	A05	20514465	20515666	-	cytochrome c oxidase subunit 5b-1, mitochondrial [Brassica napus]
							Bra027225	A05	20516568	20522340	-	PREDICTED: uncharacterized protein LOC103869897 isoform X1 [Brassica rapa]
							Bra027226	A05	20523528	20525428	+	PREDICTED: pentatricopeptide repeat-containing protein At3g15590, mitochondrial [Brassica oleracea var. oleracea]
							Bra027227	A05	20525965	20526696	+	autophagy-related protein 8i [Brassica napus]
							Bra027228	A05	20529042	20530619	+	coleoptile phototropism protein 1 [Brassica napus]
							Bra027229	A05	20531421	20534162	-	trichohyalin-like [Brassica napus]
							Bra027230	A05	20536548	20538348	+	PREDICTED: probable 2-oxoglutarate-dependent dioxygenase AOP1 isoform X1 [Brassica rapa]
							Bra027231	A05	20543609	20553762	+	PREDICTED: probable 2-oxoglutarate-dependent dioxygenase AOP1 [Brassica oleracea var. oleracea]
							Bra027232	A05	20555342	20556584	-	auxin-responsive protein IAA19-like [Brassica napus]
							Bra027233	A05	20569576	20569782	-	uncharacterized protein BNAA05G24000D [Brassica napus]
							Bra027234	A05	20576794	20577746	+	uncharacterized protein LOC106402381 [Brassica napus]
							Bra027235	A05	20578567	20581505	+	peptidyl-prolyl cis-trans isomerase CYP37, chloroplastic isoform X1 [Brassica napus]
							Bra027236	A05	20581681	20582001	-	uncharacterized protein LOC106406648 [Brassica napus]
							Bra027237	A05	20590430	20591850	-	NAC transcription factor 56 [Brassica napus]
							Bra027238	A05	20609144	20610345	-	NAC domain-containing protein 55-like [Brassica napus]
							Bra027239	A05	20619076	20620162	-	PREDICTED: uncharacterized protein LOC103869915 [Brassica rapa]
							Bra027240	A05	20621361	20622297	+	PREDICTED: uncharacterized protein LOC103869916 [Brassica rapa]
							Bra027242	A05	20636928	20641737	+	PREDICTED: WD repeat-containing protein 44 [Brassica rapa]
							Bra027243	A05	20642333	20643192	-	stem-specific protein TSJT1-like [Brassica napus]
							Bra027244	A05	20645879	20647775	-	PREDICTED: ultraviolet-B receptor UVR8 [Raphanus sativus]
							Bra027245	A05	20648684	20652606	-	PREDICTED: plant intracellular Ras-group-related LRR protein 6 [Brassica rapa]
							Bra027246	A05	20653164	20654258	-	PREDICTED: RNA polymerase II degradation factor 1 [Brassica rapa]
							Bra027247	A05	20657213	20660117	+	PREDICTED: putative nuclear RNA export factor SDE5 isoform X1 [Brassica rapa]
							Bra027248	A05	20660348	20663352	-	choline transporter protein 1 [Brassica napus]
							Bra027249	A05	20664550	20665559	-	PREDICTED: expansin-A12 [Brassica oleracea var. oleracea]
							Bra027250	A05	20666899	20668139	-	PREDICTED: thioredoxin M4, chloroplastic [Brassica rapa]
							Bra027251	A05	20668863	20669318	-	PREDICTED: histone H3.v1 [Brassica rapa]
							Bra027252	A05	20669737	20672305	-	PREDICTED: probable ubiquitin-conjugating enzyme E2 25 [Brassica rapa]
							Bra027254	A05	20683494	20683920	+	metallothionein-like protein 3 [Brassica napus]
							Bra027255	A05	20685422	20685979	+	uncharacterized protein LOC106406650 [Brassica napus]
							Bra027256	A05	20686079	20686513	-	uncharacterized protein BNAA05G24220D isoform X2 [Brassica napus]
							Bra027257	A05	20688505	20689335	+	PREDICTED: lectin-like protein At3g16530 [Brassica rapa]
							Bra027259	A05	20692899	20695814	+	PREDICTED: protein SPA1-RELATED 3 isoform X1 [Brassica rapa]
							Bra027260	A05	20696224	20697711	-	beta-glucuronosyltransferase GlcAT14A [Eutrema salsugineum]
							Bra027261	A05	20713970	20716167	+	PREDICTED: proton pump-interactor 2 [Brassica rapa]
							Bra027262	A05	20727844	20728521	+	PREDICTED: VQ motif-containing protein 19 [Brassica rapa]
							Bra027263	A05	20729489	20730727	-	PREDICTED: uncharacterized protein LOC103869940 [Brassica rapa]
							Bra027264	A05	20731045	20731634	+	PREDICTED: uncharacterized protein LOC103869941 [Brassica rapa]
							Bra027265	A05	20734312	20734926	+	PREDICTED: squamosa promoter-binding-like protein 5 [Brassica rapa]
							Bra027266	A05	20735218	20736609	-	PREDICTED: probable protein phosphatase 2C 39 [Brassica rapa]
							Bra027267	A05	20738036	20738641	+	PREDICTED: uncharacterized protein LOC103869945 [Brassica rapa]
							Bra027268	A05	20739170	20741386	-	protein RICE SALT SENSITIVE 3-like [Brassica napus]
							Bra027269	A05	20751254	20755913	+	PREDICTED: germinal center kinase 1 [Brassica rapa]
							Bra027270	A05	20764619	20765101	-	PREDICTED: LOW QUALITY PROTEIN: ethylene-responsive transcription factor 4 [Brassica rapa]
							Bra027272	A05	20778136	20779722	+	PREDICTED: putative pentatricopeptide repeat-containing protein At3g15200 [Brassica rapa]
							Bra027274	A05	20781318	20784746	-	uncharacterized protein BNAC05G38440D [Brassica napus]
							Bra027275	A05	20791636	20793161	+	E3 SUMO-protein ligase MMS21-like [Brassica napus]
							Bra027276	A05	20793499	20795210	+	uncharacterized exonuclease domain-containing protein At3g15140 [Brassica napus]
							Bra027277	A05	20796325	20797447	+	uncharacterized protein LOC111216082 [Brassica napus]
							Bra027279	A05	20799762	20801714	-	uncharacterized protein LOC106400884 [Brassica napus]
							Bra027280	A05	20814978	20816745	-	PREDICTED: reticulon-4-interacting protein 1, mitochondrial [Brassica rapa]
							Bra027281	A05	20818578	20820278	-	PREDICTED: RNA exonuclease 4 [Brassica rapa]
							Bra027282	A05	20821618	20823375	+	PREDICTED: uncharacterized protein LOC103869959 isoform X2 [Brassica rapa]
							Bra027283	A05	20826460	20827107	+	PREDICTED: uncharacterized protein LOC103869961 [Brassica rapa]
							Bra027284	A05	20829037	20830257	-	TCP4 [Brassica rapa subsp. rapa]
							Bra027285	A05	20837786	20839575	-	multiple organellar RNA editing factor 8, chloroplastic..mitochondrial-like [Brassica napus]
							Bra027286	A05	20842154	20844157	-	protein DJ-1 homolog A-like isoform X2 [Brassica napus]
							Bra027287	A05	20845348	20846245	-	PREDICTED: multiple organellar RNA editing factor 8, chloroplastic..mitochondrial-like [Brassica rapa]
							Bra027288	A05	20849176	20850330	-	PREDICTED: F-box..kelch-repeat protein SKIP6-like [Brassica rapa]
							Bra027290	A05	20865370	20869463	+	PREDICTED: increased DNA methylation 1 [Brassica rapa]
							Bra027291	A05	20870121	20871974	+	probable beta-1,3-galactosyltransferase 13 [Brassica napus]
							Bra027292	A05	20877197	20880081	+	TPR repeat-containing thioredoxin TTL2-like [Brassica napus]
							Bra027293	A05	20881154	20885756	-	PPC1 [Arabidopsis thaliana]
							Bra027294	A05	20889534	20893797	-	rab3 GTPase-activating protein non-catalytic subunit-like [Brassica napus]
							Bra027295	A05	20894148	20895959	+	PREDICTED: uncharacterized protein LOC103869975 [Brassica rapa]
							Bra027296	A05	20896358	20900418	-	polynucleotide 3'-phosphatase ZDP-like isoform X3 [Brassica napus]
							Bra027297	A05	20901976	20904238	-	protein DELAY OF GERMINATION 1 isoform X2 [Brassica napus]
							Bra027298	A05	20905305	20906597	-	protein GRAVITROPIC IN THE LIGHT 1-like isoform X1 [Brassica napus]
							Bra027299	A05	20911295	20911536	+	--
							Bra027301	A05	20919176	20920655	-	protein trichome birefringence-like 41 [Brassica napus]
							Bra027307	A05	20967280	20973994	-	PREDICTED: probable leucine-rich repeat receptor-like serine..threonine-protein kinase At3g14840 [Brassica rapa]
							Bra027308	A05	20978114	20980000	-	PREDICTED: uncharacterized protein LOC106296812 [Brassica oleracea var. oleracea]
							Bra027310	A05	20982481	20984571	-	PREDICTED: trifunctional UDP-glucose 4,6-dehydratase..UDP-4-keto-6-deoxy-D-glucose 3,5-epimerase..UDP-4-keto-L-rhamnose-reductase RHM3 [Brassica oleracea var. oleracea]
							Bra027314	A05	21002455	21003761	+	PREDICTED: bidirectional sugar transporter SWEET2-like [Brassica rapa]
							Bra027315	A05	21006379	21007986	+	PREDICTED: protein FLX-like 1 [Brassica rapa]
							Bra027316	A05	21008495	21009588	+	PREDICTED: protein Jade-1-like isoform X1 [Brassica rapa]
							Bra027317	A05	21013326	21015683	-	PREDICTED: mitogen-activated protein kinase 19-like [Brassica rapa]
							Bra027318	A05	21019090	21019725	-	SART-1 family protein DOT2-like [Brassica napus]
							Bra027319	A05	21022174	21024040	-	cytochrome P450 72A13-like [Brassica napus]
							Bra027320	A05	21024983	21026939	-	cytochrome P450 72A15 isoform X1 [Brassica napus]
							Bra027321	A05	21028480	21030414	-	cytochrome P450 72A15 isoform X3 [Brassica napus]
							Bra027322	A05	21031337	21033518	-	cytochrome P450 72A15 [Brassica napus]
							Bra027323	A05	21036373	21038526	-	PREDICTED: cytochrome P450 72A13 [Brassica rapa]
							Bra027324	A05	21038975	21040957	-	PREDICTED: cytochrome P450 72A13 [Brassica rapa]
							Bra027325	A05	21041332	21044979	-	PREDICTED: 60S ribosomal protein L18a-2 isoform X3 [Tarenaya hassleriana]
							Bra027326	A05	21047268	21050324	+	PREDICTED: C2 domain-containing protein At1g53590 [Brassica rapa]
							Bra027327	A05	21050700	21051911	-	PREDICTED: pentatricopeptide repeat-containing protein At3g14580, mitochondrial [Brassica rapa]
							Bra027328	A05	21055234	21070641	-	PREDICTED: putative callose synthase 8 [Brassica rapa]
							Bra027329	A05	21073057	21073521	-	uncharacterized protein BNAA05G24970D [Brassica napus]
							Bra027330	A05	21079093	21080391	+	PREDICTED: geranylgeranyl pyrophosphate synthase 9, chloroplastic-like [Brassica rapa]
							Bra027331	A05	21081001	21082587	-	PREDICTED: cytochrome P450 705A5-like [Brassica oleracea var. oleracea]
							Bra027332	A05	21085889	21089017	-	PREDICTED: putative disease resistance RPP13-like protein 1 isoform X2 [Brassica rapa]
							Bra027333	A05	21090620	21094849	+	PREDICTED: putative disease resistance protein At3g14460 [Brassica rapa]
							Bra027334	A05	21095127	21097287	-	PREDICTED: polyadenylate-binding protein-interacting protein 9 [Brassica rapa]
							Bra027336	A05	21119092	21120885	+	PREDICTED: 9-cis-epoxycarotenoid dioxygenase NCED3, chloroplastic [Brassica rapa]
							Bra027337	A05	21129820	21130145	+	uncharacterized protein BNAA05G25040D [Brassica napus]
							Bra027338	A05	21131027	21133091	-	peroxisomal ..S..-2-hydroxy-acid oxidase GLO1-like isoform X1 [Brassica napus]
							Bra027339	A05	21134044	21138945	-	peroxisomal ..S..-2-hydroxy-acid oxidase GLO2-like [Brassica napus]
							Bra027340	A05	21140821	21142892	+	PREDICTED: probable sugar phosphate..phosphate translocator At3g14410 isoform X2 [Brassica rapa]
							Bra027341	A05	21143604	21147068	+	PREDICTED: ubiquitin carboxyl-terminal hydrolase 25 [Brassica rapa]
							Bra027342	A05	21147741	21147971	-	PREDICTED: uncharacterized protein LOC103870031 [Brassica rapa]
							Bra027343	A05	21153219	21153816	+	PREDICTED: CASP-like protein 2A2 [Brassica rapa]
							Bra027344	A05	21160323	21161762	+	PREDICTED: serine..threonine-protein kinase WAG2 [Brassica rapa]
							Bra027345	A05	21162678	21164462	-	PREDICTED: uncharacterized protein LOC108861464 [Raphanus sativus]
							Bra027346	A05	21172477	21174362	-	PREDICTED: uncharacterized protein LOC103870034 isoform X1 [Brassica rapa]
							Bra027348	A05	21185728	21186121	+	PREDICTED: uncharacterized protein LOC103870039 isoform X2 [Brassica rapa]
							Bra027349	A05	21186708	21187184	+	putative RING-H2 finger protein ATL62 [Brassica napus]
							Bra027350	A05	21193645	21196611	+	pectinesterase..pectinesterase inhibitor 3 [Brassica napus]
							Bra027351	A05	21199321	21199962	+	PREDICTED: uncharacterized protein LOC103870042 [Brassica rapa]
							Bra027352	A05	21201242	21202461	+	PREDICTED: E3 ubiquitin-protein ligase RNF144A [Brassica rapa]
							Bra027353	A05	21204484	21206796	+	PREDICTED: subtilisin-like protease SBT1.5 [Brassica rapa]
							Bra027355	A05	21213537	21215239	+	PREDICTED: ethylene-responsive transcription factor RAP2-2 [Brassica rapa]
							Bra027356	A05	21217355	21219238	+	PREDICTED: GDSL esterase..lipase 1-like [Brassica rapa]
							Bra027357	A05	21220508	21221943	+	GDSL esterase..lipase 4-like [Brassica napus]
							Bra027358	A05	21222908	21224893	-	GDSL esterase..lipase ESM1 [Brassica napus]
							Bra027359	A05	21236294	21238026	-	GDSL esterase..lipase ESM1-like precursor [Brassica napus]
							Bra027362	A05	21264385	21268570	+	PREDICTED: phosphoinositide phosphatase SAC2 [Brassica rapa]
							Bra027363	A05	21269610	21271040	+	PREDICTED: dnaJ homolog subfamily B member 2-like [Brassica rapa]
							Bra027365	A05	21273664	21273858	-	protein PATRONUS 1-like [Brassica napus]
							Bra027366	A05	21274673	21275201	+	PREDICTED: dormancy-associated protein homolog 4-like [Brassica rapa]
							Bra027367	A05	21277593	21283031	+	COP1-interacting protein 7-like [Brassica napus]
							Bra027368	A05	21283771	21285552	+	PREDICTED: uncharacterized protein LOC103870061 [Brassica rapa]
							Bra027369	A05	21285792	21287467	-	PREDICTED: uncharacterized protein LOC103870060 [Brassica rapa]
							Bra027370	A05	21288736	21296751	+	PREDICTED: peroxisomal ..S..-2-hydroxy-acid oxidase GLO3-like isoform X1 [Brassica rapa]
							Bra027371	A05	21296978	21304442	-	nuclear pore complex protein NUP107 [Brassica napus]
							Bra027372	A05	21304876	21306360	+	PREDICTED: protein FLUORESCENT IN BLUE LIGHT, chloroplastic isoform X1 [Brassica rapa]
							Bra027373	A05	21307936	21309792	+	PREDICTED: exocyst complex component EXO70A1 [Brassica rapa]
							Bra027374	A05	21310359	21311500	-	sm-like protein LSM1B [Brassica napus]
							Bra027375	A05	21314350	21316269	+	PREDICTED: cation..calcium exchanger 3 [Brassica rapa]
							Bra027376	A05	21316555	21318885	+	PREDICTED: subtilisin-like protease SBT1.7 [Brassica oleracea var. oleracea]
							Bra027377	A05	21321666	21324121	+	PREDICTED: probable GTP diphosphokinase RSH2, chloroplastic [Brassica rapa]
							Bra027378	A05	21325516	21327048	-	PREDICTED: scarecrow-like protein 29 [Brassica rapa]
							Bra027379	A05	21332233	21334396	+	PREDICTED: protein Brevis radix-like 2 [Brassica rapa]
							Bra027380	A05	21337609	21342171	+	uncharacterized protein LOC111215723 isoform X5 [Brassica napus]
							Bra027381	A05	21348677	21349777	+	protein BIG GRAIN 1-like A [Brassica napus]
							Bra027382	A05	21355970	21356898	+	PREDICTED: ubiquitin-like protein ATG12A [Brassica rapa]
							Bra027384	A05	21359867	21361415	-	growth-regulating factor 5-like [Brassica napus]
							Bra027385	A05	21365642	21366712	-	PREDICTED: uncharacterized protein LOC103870080 [Brassica rapa]
							Bra027387	A05	21373592	21374990	+	eukaryotic initiation factor 4A-14 [Durio zibethinus]
							Bra027388	A05	21378821	21379093	+	PREDICTED: uncharacterized protein LOC103870083 [Brassica rapa]
							Bra027389	A05	21388820	21390189	+	PREDICTED: transcription factor MYB26-like [Brassica rapa]
							Bra027390	A05	21391088	21392342	-	PREDICTED: uncharacterized protein LOC103870086 [Brassica rapa]
							Bra027391	A05	21394391	21399054	+	BnaCnng28560D [Brassica napus]
							Bra027392	A05	21400674	21401186	-	PREDICTED: LOB domain-containing protein 22 [Brassica rapa]
							Bra027393	A05	21403761	21403970	+	Glycoside hydrolase, family 35 [Corchorus capsularis]
							Bra027394	A05	21408920	21412013	-	PREDICTED: protein indeterminate-domain 11-like isoform X2 [Brassica rapa]
							Bra027395	A05	21419110	21421160	-	copia-type polyprotein, putative; 28768-32772 [Arabidopsis thaliana]
							Bra027397	A05	21429362	21433139	+	PREDICTED: beta-fructofuranosidase, insoluble isoenzyme CWINV1 [Brassica rapa]
							Bra027398	A05	21435137	21436765	+	PREDICTED: beta-fructofuranosidase, insoluble isoenzyme CWINV5 [Brassica rapa]
							Bra027399	A05	21436900	21438621	-	PREDICTED: nucleosome assembly protein 1;4 [Brassica rapa]
							Bra027400	A05	21439031	21440289	-	PREDICTED: LOW QUALITY PROTEIN: mitotic apparatus protein p62 [Brassica rapa]
							Bra027401	A05	21441275	21444168	+	LOW QUALITY PROTEIN: transmembrane 9 superfamily member 7 [Eutrema salsugineum]
							Bra027402	A05	21444324	21446204	-	PREDICTED: putative pentatricopeptide repeat-containing protein At3g13770, mitochondrial [Brassica rapa]
							Bra027403	A05	21447227	21451629	-	PREDICTED: beta-galactosidase 1 [Brassica rapa]
							Bra027404	A05	21458736	21460323	-	PREDICTED: uncharacterized protein LOC103870100 [Brassica rapa]
							Bra027405	A05	21463468	21467073	+	PREDICTED: 3-epi-6-deoxocathasterone 23-monooxygenase [Brassica rapa]
							Bra027406	A05	21468289	21468834	+	PREDICTED: PRA1 family protein F3 [Brassica rapa]
							Bra027407	A05	21469950	21471514	+	PREDICTED: U2 small nuclear ribonucleoprotein B'' isoform X2 [Brassica rapa]
							Bra027408	A05	21472501	21475415	-	PREDICTED: inactive protein kinase SELMODRAFT_444075-like [Brassica rapa]
							Bra027409	A05	21483739	21487290	-	PREDICTED: casein kinase 1-like protein HD16 [Tarenaya hassleriana]
							Bra027410	A05	21491774	21492340	-	PREDICTED: dirigent protein 7-like [Brassica rapa]
							Bra027411	A05	21497049	21498593	+	PREDICTED: probable polyamine transporter At3g13620 [Brassica rapa]
							Bra027412	A05	21498891	21500412	-	feruloyl CoA ortho-hydroxylase 1 [Arabidopsis lyrata subsp. lyrata]
							Bra027413	A05	21504196	21504953	-	feruloyl CoA ortho-hydroxylase 1-like [Brassica napus]
							Bra027414	A05	21506560	21508725	-	PREDICTED: IQ domain-containing protein IQM2 [Brassica rapa]
							Bra027416	A05	21520347	21521819	+	PREDICTED: uncharacterized protein LOC103870112 isoform X1 [Brassica rapa]
							Bra027418	A05	21529167	21530375	+	BnaA05g36970D [Brassica napus]
							Bra027419	A05	21532540	21533412	+	BnaA05g36970D [Brassica napus]
							Bra027420	A05	21540038	21541178	+	PREDICTED: serine..arginine-rich SC35-like splicing factor SCL30A isoform X2 [Brassica rapa]
							Bra027421	A05	21542868	21544595	+	PREDICTED: glucan endo-1,3-beta-glucosidase 4 [Brassica rapa]
							Bra027422	A05	21545317	21546493	+	PREDICTED: constitutive photomorphogenesis protein 10 [Brassica rapa]
							Bra027423	A05	21549831	21554707	-	PREDICTED: transcription repressor MYB5 [Brassica rapa]
							Bra027424	A05	21558384	21559011	+	PREDICTED: MAP3K epsilon protein kinase 1 [Brassica rapa]
							Bra027425	A05	21561672	21561857	-	BnaC05g39800D [Brassica napus]
							Bra027426	A05	21568667	21570703	-	PREDICTED: uncharacterized protein LOC103870125 [Brassica rapa]
							Bra027429	A05	21603768	21606896	+	PREDICTED: lysine--tRNA ligase, chloroplastic..mitochondrial [Brassica rapa]
							Bra027431	A05	21609867	21612509	-	PREDICTED: chaperonin 60 subunit beta 2, chloroplastic [Brassica rapa]
							Bra027432	A05	21614118	21616680	+	PREDICTED: uncharacterized protein LOC103870130 [Brassica rapa]
							Bra027433	A05	21620798	21621413	-	BnaAnng17130D [Brassica napus]
							Bra027434	A05	21624542	21625847	-	TATA-box-binding protein 1 [Brassica napus]
							Bra027435	A05	21627020	21627769	-	BnaA05g25850D [Brassica napus]
							Bra027436	A05	21628735	21629664	-	PREDICTED: E3 ubiquitin-protein ligase RING1 [Brassica rapa]
							Bra027437	A05	21631074	21632676	-	uncharacterized protein BNAA05G25870D isoform X1 [Brassica napus]
							Bra027438	A05	21633136	21635064	+	hypothetical protein [Brassica rapa subsp. chinensis]
							Bra034679	A05	21655843	21658235	-	L-ascorbate oxidase homolog isoform X2 [Brassica napus]
							Bra034680	A05	21660985	21662904	+	PREDICTED: L-ascorbate oxidase homolog [Raphanus sativus]
							Bra034681	A05	21663256	21666522	-	PREDICTED: receptor-like protein kinase BRI1-like 3 [Brassica rapa]
							Bra034683	A05	21694496	21696389	+	high mobility group B protein 10-like [Brassica napus]
							Bra034684	A05	21708209	21708479	-	BnaA05g25950D [Brassica napus]
							Bra034686	A05	21715789	21716624	+	PREDICTED: high mobility group B protein 10-like [Brassica rapa]
							Bra034689	A05	21722589	21724636	-	uncharacterized WD repeat-containing protein C2A9.03 [Eutrema salsugineum]
							Bra034690	A05	21726425	21728591	-	PREDICTED: vacuolar cation..proton exchanger 2-like [Brassica rapa]
							Bra034691	A05	21733716	21734195	+	PREDICTED: chaperone protein dnaJ 11, chloroplastic-like [Brassica rapa]
							Bra034692	A05	21736238	21741937	-	PREDICTED: enhancer of mRNA-decapping protein 4 isoform X1 [Brassica rapa]
							Bra034693	A05	21744386	21749255	-	PREDICTED: enhancer of mRNA-decapping protein 4 isoform X3 [Brassica rapa]
							Bra034694	A05	21751142	21751351	+	uncharacterized protein LOC106345412 [Brassica napus]
							Bra034695	A05	21753024	21753594	-	--
							Bra034696	A05	21756359	21758748	-	PREDICTED: RNA-binding protein PNO1 [Brassica rapa]
							Bra034697	A05	21760228	21763701	-	PREDICTED: beta-glucosidase 9-like [Brassica rapa]
							Bra034698	A05	21765700	21767262	-	PREDICTED: protein CWC15 homolog [Raphanus sativus]
							Bra034699	A05	21767760	21768824	-	WEB family protein At3g13190-like isoform X1 [Brassica napus]
							Bra034700	A05	21770533	21770850	+	uncharacterized protein LOC111211938 [Brassica napus]
							Bra034701	A05	21771603	21772532	-	PREDICTED: uncharacterized protein LOC106337615 [Brassica oleracea var. oleracea]
							Bra034702	A05	21774663	21775381	+	PREDICTED: formin-like protein 20 [Brassica rapa]
							Bra034703	A05	21779057	21779650	-	PREDICTED: uncharacterized protein LOC103870193 [Brassica rapa]
							Bra034704	A05	21781166	21782163	+	PREDICTED: 30S ribosomal protein S10, chloroplastic-like [Brassica rapa]
							Bra034705	A05	21785323	21786504	+	PREDICTED: serine acetyltransferase 3, mitochondrial [Brassica rapa]
							Bra034707	A05	21795795	21797780	+	PREDICTED: uncharacterized protein LOC103870383 [Brassica rapa]
							Bra034708	A05	21805346	21808966	+	PREDICTED: putative DUF21 domain-containing protein At3g13070, chloroplastic [Brassica rapa]
							Bra034709	A05	21809908	21812901	-	PREDICTED: protein STRUBBELIG-RECEPTOR FAMILY 4 [Brassica rapa]
							Bra034710	A05	21814600	21817082	-	PREDICTED: uncharacterized protein LOC103870199 isoform X2 [Brassica rapa]
							Bra034711	A05	21820252	21822165	+	uncharacterized protein LOC106452345 isoform X1 [Brassica napus]
							Bra034712	A05	21824212	21826560	+	PREDICTED: uncharacterized protein LOC103870201 [Brassica rapa]
							Bra034713	A05	21830268	21832219	-	PREDICTED: NAC domain-containing protein 21..22 isoform X2 [Brassica rapa]
							Bra034714	A05	21833772	21834875	+	PREDICTED: uncharacterized protein LOC103870205 [Brassica rapa]
							Bra034715	A05	21839992	21841906	+	PREDICTED: uncharacterized protein LOC103870208 isoform X1 [Brassica rapa]
							Bra034716	A05	21842514	21843721	-	PREDICTED: protein Iojap, chloroplastic-like [Brassica rapa]
							Bra034718	A05	21851501	21852683	+	PREDICTED: probable BOI-related E3 ubiquitin-protein ligase 3 [Brassica rapa]
							Bra034719	A05	21859318	21860715	-	PREDICTED: transcription factor JUNGBRUNNEN 1-like [Brassica rapa]
							Bra034720	A05	21871090	21872698	-	PREDICTED: feruloyl CoA ortho-hydroxylase 2-like [Brassica rapa]
							Bra034721	A05	21878273	21879304	-	PREDICTED: uncharacterized protein LOC103870213 isoform X1 [Brassica rapa]
							Bra034722	A05	21887148	21887693	-	uncharacterized protein LOC106345423 [Brassica napus]
							Bra034723	A05	21888260	21888874	+	uncharacterized protein BNAA05G26330D [Brassica napus]
							Bra034725	A05	21902640	21903038	+	auxin-responsive protein SAUR72-like [Brassica napus]
							Bra034727	A05	21908239	21916400	-	PREDICTED: protein PHOTOPERIOD-INDEPENDENT EARLY FLOWERING 1 isoform X1 [Brassica rapa]
							Bra034728	A05	21917956	21919183	+	peroxisomal 2,4-dienoyl-CoA reductase-like [Brassica napus]
							Bra034729	A05	21919994	21921818	+	PREDICTED: phosphoglycerate kinase 1, chloroplastic [Brassica rapa]
							Bra034731	A05	21926515	21926909	+	phosphoglycerate kinase 1, chloroplastic-like [Brassica napus]
							Bra034732	A05	21927337	21928488	-	PREDICTED: probable ubiquitin-conjugating enzyme E2 23 [Brassica rapa]
							Bra034733	A05	21929268	21931331	+	PREDICTED: pentatricopeptide repeat-containing protein At3g12770 [Raphanus sativus]
							Bra034734	A05	21931494	21933341	-	DCN1-like protein 2 [Brassica napus]
							Bra034735	A05	21936217	21937316	+	BnaA05g26420D [Brassica napus]
							Bra034736	A05	21937705	21939371	-	hypothetical protein CARUB_v10014082mg [Capsella rubella]
							Bra034737	A05	21941042	21942257	+	PREDICTED: LOW QUALITY PROTEIN: myb family transcription factor PHL12 [Brassica rapa]
							Bra034738	A05	21945236	21946296	+	PREDICTED: transcription repressor MYB6 [Brassica rapa]
							Bra034739	A05	21947957	21949262	+	PREDICTED: uncharacterized protein LOC103870233 [Brassica rapa]
							Bra034741	A05	21954999	21957058	-	aspartyl protease family protein 2 [Brassica napus]
							Bra034742	A05	21958528	21960498	-	PREDICTED: aspartyl protease family protein 2-like [Brassica rapa]
							Bra034743	A05	21968133	21970411	+	PREDICTED: serine..threonine-protein kinase AGC1-5 [Brassica rapa]
							Bra034744	A05	21971375	21974953	+	PREDICTED: zinc finger CCCH domain-containing protein 37 [Brassica rapa]
							Bra034745	A05	21976067	21979770	+	CTP synthase [Brassica napus]
							Bra034746	A05	21982069	21982881	-	PREDICTED: fasciclin-like arabinogalactan protein 14 [Brassica rapa]
							Bra034747	A05	21983895	21984317	+	PREDICTED: uncharacterized protein LOC103870241 [Brassica rapa]
							Bra034748	A05	21988890	21989369	-	PREDICTED: zinc finger A20 and AN1 domain-containing stress-associated protein 5-like [Brassica rapa]
							Bra034749	A05	21990458	21992101	+	probable protein phosphatase 2C 38 isoform X2 [Brassica napus]
							Bra034750	A05	21993316	21994286	-	nudix hydrolase 16, mitochondrial [Brassica napus]
							Bra034751	A05	21998094	22000530	+	PREDICTED: telomere repeat-binding protein 3-like [Brassica rapa]
							Bra034752	A05	22001195	22003605	-	factor of DNA methylation 3-like isoform X2 [Brassica napus]
							Bra034753	A05	22007562	22010656	-	BnaC05g40660D [Brassica napus]
							Bra034754	A05	22012226	22017526	+	endochitinase CH25-like [Brassica napus]
							Bra034755	A05	22018167	22019147	+	cysteine proteinase inhibitor [Brassica rapa]
							Bra034756	A05	22019455	22022150	-	BnaA01g30580D [Brassica napus]
							Bra034757	A05	22022742	22023808	-	nascent polypeptide-associated complex subunit alpha-like protein 1 [Brassica napus]
							Bra034758	A05	22024128	22027356	+	hypothetical protein EUTSA_v10020154mg [Eutrema salsugineum]
							Bra034759	A05	22027888	22028400	+	PREDICTED: 50S ribosomal protein L10, chloroplastic [Brassica rapa]
							Bra034760	A05	22029460	22032325	-	PREDICTED: ankyrin repeat-containing protein ITN1 [Brassica rapa]
							Bra034761	A05	22036479	22037015	+	PREDICTED: uncharacterized protein LOC103870256 [Brassica rapa]
							Bra034762	A05	22038055	22039319	-	PREDICTED: protein LNK3-like isoform X1 [Brassica rapa]
							Bra034763	A05	22041069	22042711	-	PREDICTED: bifunctional protein FolD 2 [Brassica rapa]
							Bra034764	A05	22043730	22048457	+	PREDICTED: retinoblastoma-related protein 1 isoform X2 [Brassica rapa]
							Bra034765	A05	22051971	22054503	-	PREDICTED: probable protein arginine N-methyltransferase 3 [Brassica rapa]
							Bra034766	A05	22054956	22056130	+	BnaA05g26780D [Brassica napus]
							Bra034767	A05	22056653	22058580	-	transcription factor TGA6 isoform X2 [Capsella rubella]
	qPET-3	A06	A6S33-A6S61	97.60-103.19	5.59	24350023-24703831	Bra033724	A06	24354897	24357207	-	PREDICTED: zinc finger protein NUTCRACKER [Brassica rapa]
							Bra033723	A06	24363777	24365517	-	PREDICTED: uncharacterized protein LOC108819805 [Raphanus sativus]
							Bra033722	A06	24370798	24371532	-	PREDICTED: fasciclin-like arabinogalactan protein 13 [Brassica rapa]
							Bra033721	A06	24379863	24381857	+	BnaA06g36310D [Brassica napus]
							Bra033720	A06	24382365	24384278	-	pentatricopeptide repeat-containing protein ELI1, chloroplastic isoform X1 [Brassica napus]
							Bra033719	A06	24386050	24386850	+	PREDICTED: G-box-binding factor 4 [Brassica rapa]
							Bra033718	A06	24387795	24390190	-	BnaA06g36340D [Brassica napus]
							Bra033717	A06	24393150	24393308	-	PREDICTED: uncharacterized protein LOC103843180 [Brassica rapa]
							Bra033716	A06	24398907	24399287	-	PREDICTED: uncharacterized protein LOC103828122 [Brassica rapa]
							Bra033715	A06	24403100	24404457	+	PREDICTED: nuclear polyadenylated RNA-binding protein 3 [Brassica rapa]
							Bra033714	A06	24404749	24408929	-	PREDICTED: cellulose synthase A catalytic subunit 4 [UDP-forming] isoform X2 [Brassica rapa]
							Bra033713	A06	24409622	24411343	-	acid phosphatase 1 [Brassica napus]
							Bra033712	A06	24418636	24418932	+	uncharacterized protein LOC106410545 [Brassica napus]
							Bra033711	A06	24420149	24421522	+	PREDICTED: uncharacterized protein LOC103827936 [Brassica rapa]
							Bra033710	A06	24422081	24425251	-	PREDICTED: probable inactive histone-lysine N-methyltransferase SUVR2 [Brassica rapa]
							Bra033709	A06	24428920	24430315	+	PREDICTED: cysteine-rich repeat secretory protein 56 isoform X1 [Brassica rapa]
							Bra033708	A06	24432836	24433129	-	mitochondrial import receptor subunit TOM9-2 [Brassica napus]
							Bra033707	A06	24434817	24437095	+	PREDICTED: putative G3BP-like protein [Brassica rapa]
							Bra033706	A06	24437653	24439702	-	alcohol dehydrogenase class-3 [Herrania umbratica]
							Bra033705	A06	24444656	24448471	+	PREDICTED: uncharacterized protein LOC103827943 [Brassica rapa]
							Bra033704	A06	24450632	24463133	+	BnaC09g51820D, partial [Brassica napus]
							Bra033703	A06	24470525	24472037	+	BnaA06g36480D [Brassica napus]
							Bra033702	A06	24478092	24481144	+	PREDICTED: VAN3-binding protein [Brassica rapa]
							Bra033700	A06	24483591	24484621	-	BnaA06g36520D [Brassica napus]
							Bra033699	A06	24484818	24486434	-	PREDICTED: putative pentatricopeptide repeat-containing protein At5g43820 [Brassica rapa]
							Bra033698	A06	24487315	24491659	-	hypothetical protein MANES_03G172500 [Manihot esculenta]
							Bra033697	A06	24507133	24508509	+	PREDICTED: pentatricopeptide repeat-containing protein At5g43790 [Brassica rapa]
							Bra033696	A06	24508987	24510809	+	PREDICTED: ATP sulfurylase 4, chloroplastic [Brassica rapa]
							Bra033695	A06	24511089	24511676	-	PREDICTED: vegetative cell wall protein gp1 [Brassica rapa]
							Bra033694	A06	24513930	24516771	-	3-ketoacyl-CoA synthase 20 [Brassica napus]
							Bra033693	A06	24530864	24532881	+	PREDICTED: rRNA-processing protein EFG1-like [Brassica rapa]
							Bra033691	A06	24535216	24537819	-	PREDICTED: protein transport protein SEC23 [Brassica rapa]
							Bra033690	A06	24540208	24541421	+	transcription factor bHLH92-like [Brassica napus]
							Bra033688	A06	24546741	24549383	-	PREDICTED: uncharacterized protein LOC103827964 [Brassica rapa]
							Bra033687	A06	24562394	24564835	-	PREDICTED: ureidoglycolate hydrolase [Brassica rapa]
							Bra033686	A06	24568657	24568851	-	glu S.griseus protease inhibitor isoform X2 [Brassica napus]
							Bra033685	A06	24571566	24572063	+	BnaA02g11160D [Brassica napus]
							Bra033684	A06	24575430	24579605	-	PREDICTED: MATH domain-containing protein At5g43560 [Brassica rapa]
							Bra033683	A06	24586486	24586893	-	PREDICTED: zinc finger protein 5 [Brassica rapa]
							Bra033682	A06	24589342	24594016	-	PREDICTED: putative SWI..SNF-related matrix-associated actin-dependent regulator of chromatin subfamily A member 3-like 3 isoform X1 [Brassica rapa]
							Bra033681	A06	24598136	24601732	-	PREDICTED: uncharacterized protein LOC103827971 [Brassica rapa]
							Bra033680	A06	24602608	24603702	-	PREDICTED: RING-H2 finger protein ATL16 [Brassica rapa]
							Bra033679	A06	24610186	24612120	+	PREDICTED: uncharacterized protein LOC103827973 [Brassica rapa]
							Bra033678	A06	24613100	24614225	+	PREDICTED: serine..threonine-protein phosphatase PP1 isozyme 7 isoform X1 [Brassica rapa]
							Bra033676	A06	24621647	24623680	+	PREDICTED: probable inorganic phosphate transporter 1-3 [Brassica rapa]
							Bra033675	A06	24626553	24628261	+	PREDICTED: probable inorganic phosphate transporter 1-3 [Brassica rapa]
							Bra033674	A06	24630209	24631315	-	BnaC07g00050D [Brassica napus]
							Bra033673	A06	24632746	24634415	+	probable inorganic phosphate transporter 1-3 [Eutrema salsugineum]
							Bra033672	A06	24640328	24645198	+	PREDICTED: uncharacterized protein LOC103827980 isoform X1 [Brassica rapa]
							Bra033671	A06	24647663	24649238	+	PREDICTED: squamosa promoter-binding-like protein 2 isoform X3 [Brassica rapa]
							Bra033670	A06	24649987	24655300	-	BnaC07g17020D [Brassica napus]
							Bra033669	A06	24662528	24662824	+	PREDICTED: uncharacterized protein LOC103827982 [Brassica rapa]
							Bra033668	A06	24664041	24664433	+	PREDICTED: nuclear transcription factor Y subunit C-5 [Brassica rapa]
							Bra033667	A06	24667851	24668956	+	BnaA06g36820D [Brassica napus]
							Bra033666	A06	24671018	24671575	+	PREDICTED: zinc finger protein AZF3 [Brassica rapa]
							Bra033665	A06	24671987	24679351	-	uncharacterized protein LOC106373996 [Brassica napus]
							Bra033664	A06	24686429	24686922	-	PREDICTED: uncharacterized protein LOC103827990 [Brassica rapa]
							Bra033663	A06	24689479	24690869	-	BnaA06g36860D [Brassica napus]
							Bra033662	A06	24691984	24696459	+	PREDICTED: transcription initiation factor TFIID subunit 4b isoform X1 [Brassica rapa]
							Bra033661	A06	24698414	24700334	-	PREDICTED: uncharacterized protein LOC103827993 isoform X1 [Brassica rapa]
GW	qGW-1	A10	A10S4-A10S24	70.40-74.85	4.45	2720349-3481119	Bra033361	A10	2723384	2724674	+	glutathione S-transferase F4 isoform X2 [Brassica napus]
							Bra033360	A10	2725187	2726412	+	PREDICTED: LOW QUALITY PROTEIN: glutathione S-transferase F5-like [Brassica rapa]
							Bra033359	A10	2729433	2730724	+	PREDICTED: glutathione S-transferase F5-like isoform X2 [Brassica rapa]
							Bra033357	A10	2733550	2733918	+	PREDICTED: protein RALF-like 1 [Brassica rapa]
							Bra033356	A10	2736016	2744571	+	PREDICTED: uncharacterized protein LOC103844551 isoform X1 [Brassica rapa]
							Bra033355	A10	2752181	2753361	+	PREDICTED: uncharacterized protein Os08g0359500-like [Brassica rapa]
							Bra033354	A10	2754138	2755091	+	BnaC05g01490D [Brassica napus]
							Bra033353	A10	2755423	2757050	-	PREDICTED: E3 ubiquitin-protein ligase BAH1 [Brassica rapa]
							Bra033352	A10	2759918	2764159	-	predicted protein [Arabidopsis lyrata subsp. lyrata]
							Bra033351	A10	2764619	2765136	+	60S ribosomal protein L22-3 [Brassica napus]
							Bra033350	A10	2765870	2766273	+	late embryogenis abundant protein 2 [Brassica napus]
							Bra033349	A10	2768651	2769151	-	uncharacterized protein LOC106422913 [Brassica napus]
							Bra033348	A10	2770690	2773360	-	BnaC05g01440D [Brassica napus]
							Bra033347	A10	2775786	2777312	+	PREDICTED: exopolygalacturonase clone GBGE184-like [Brassica rapa]
							Bra033345	A10	2780855	2781833	-	PREDICTED: protein DEHYDRATION-INDUCED 19 homolog 2-like [Brassica rapa]
							Bra033344	A10	2783370	2787088	+	PREDICTED: cellulose synthase-like protein D5 [Brassica rapa]
							Bra033342	A10	2789280	2791939	-	PREDICTED: importin subunit alpha-6 [Brassica rapa]
							Bra033341	A10	2799447	2800040	-	uncharacterized protein LOC106422953 [Brassica napus]
							Bra033339	A10	2803571	2804116	+	PREDICTED: uncharacterized protein LOC103844569 [Brassica rapa]
							Bra033338	A10	2804392	2805240	-	PREDICTED: transcription initiation factor TFIID subunit 13 [Brassica rapa]
							Bra033337	A10	2805781	2809085	-	PREDICTED: probable beta-D-xylosidase 2 [Brassica rapa]
							Bra033336	A10	2811382	2812908	+	PREDICTED: LOW QUALITY PROTEIN: equilibrative nucleotide transporter 8 [Brassica rapa]
							Bra033335	A10	2823023	2834213	+	uncharacterized protein BNAA10G01230D isoform X1 [Brassica napus]
							Bra033334	A10	2841035	2845728	-	histone-lysine N-methyltransferase MEDEA-like [Brassica napus]
							Bra033333	A10	2849433	2850251	-	PREDICTED: uncharacterized protein LOC103844576 [Brassica rapa]
							Bra033332	A10	2852364	2854078	-	PREDICTED: ATP-dependent Clp protease proteolytic subunit 5, chloroplastic [Brassica rapa]
							Bra033331	A10	2855005	2859956	-	PREDICTED: LOW QUALITY PROTEIN: ABC transporter B family member 11-like [Brassica rapa]
							Bra033330	A10	2862493	2863718	+	uncharacterized protein LOC106402079 [Brassica napus]
							Bra033329	A10	2864342	2865601	+	uncharacterized protein BNAA10G01170D isoform X2 [Brassica napus]
							Bra033328	A10	2877532	2879761	+	polygalacturonase At1g48100 [Capsella rubella]
							Bra033327	A10	2901499	2902834	+	--
							Bra033326	A10	2904370	2905227	+	PREDICTED: early nodulin-55-2-like [Brassica rapa]
							Bra033325	A10	2905552	2906540	-	cytochrome c oxidase assembly protein COX11, mitochondrial [Brassica napus]
							Bra033324	A10	2908793	2911168	-	gibberellin 2-beta-dioxygenase 6 isoform X1 [Brassica napus]
							Bra033323	A10	2919195	2921378	-	PREDICTED: probable glycerol-3-phosphate acyltransferase 2 [Brassica rapa]
							Bra033322	A10	2932871	2933412	-	PREDICTED: uncharacterized protein LOC103844590 isoform X1 [Brassica rapa]
							Bra033321	A10	2934778	2936681	-	PREDICTED: pentatricopeptide repeat-containing protein At1g02370, mitochondrial [Brassica rapa]
							Bra033320	A10	2940629	2941704	+	phosphatidylinositol 4-kinase gamma 2-like [Brassica napus]
							Bra033319	A10	2943197	2944456	-	PREDICTED: putative F-box protein At4g21240 [Brassica rapa]
							Bra033318	A10	2946511	2947773	+	PREDICTED: LOW QUALITY PROTEIN: chitinase 10 [Brassica rapa]
							Bra033317	A10	2949018	2951695	-	PREDICTED: protoporphyrinogen oxidase 1, chloroplastic [Brassica rapa]
							Bra033315	A10	2959372	2961521	+	PREDICTED: LOW QUALITY PROTEIN: transcription factor HFR1 [Brassica rapa]
							Bra033314	A10	2962463	2963605	+	germin-like protein subfamily 2 member 2 [Brassica napus]
							Bra033313	A10	2963901	2965174	+	PREDICTED: uncharacterized protein C9orf78 homolog [Brassica rapa]
							Bra033312	A10	2981605	2983958	+	PREDICTED: mannan endo-1,4-beta-mannosidase 1 [Brassica rapa]
							Bra033311	A10	2986213	2987570	+	PREDICTED: translocase of chloroplast 33, chloroplastic [Brassica rapa]
							Bra033310	A10	2987783	2988724	-	PREDICTED: uncharacterized protein LOC103844600 [Brassica rapa]
							Bra033309	A10	2990098	2993001	+	PREDICTED: uncharacterized calcium-binding protein At1g02270 [Brassica rapa]
							Bra033308	A10	2996522	2998148	+	NAC domain-containing protein 5-like [Brassica napus]
							Bra033307	A10	2999933	3002583	+	PREDICTED: uncharacterized protein LOC103844727 [Brassica rapa]
							Bra033306	A10	3006620	3008203	+	NAC domain-containing protein 68-like [Brassica napus]
							Bra033304	A10	3025752	3027285	-	BnaA08g14420D [Brassica napus]
							Bra033303	A10	3028807	3030439	+	PREDICTED: NAC domain-containing protein 5-like [Brassica rapa]
							Bra033302	A10	3032389	3033418	+	NAC domain-containing protein 5-like [Brassica napus]
							Bra033300	A10	3043214	3045333	+	PREDICTED: NAC domain-containing protein 5-like isoform X2 [Brassica rapa]
							Bra033299	A10	3049380	3050423	+	PREDICTED: NAC domain-containing protein 5-like [Brassica rapa]
							Bra033298	A10	3053505	3055047	+	PREDICTED: NAC domain-containing protein 5-like [Brassica oleracea var. oleracea]
							Bra033297	A10	3059573	3061214	-	PREDICTED: NAC domain-containing protein 62 isoform X2 [Brassica rapa]
							Bra033296	A10	3074368	3076630	+	PREDICTED: NAC domain-containing protein 1-like isoform X2 [Brassica rapa]
							Bra033295	A10	3077223	3078794	-	PREDICTED: protein arv1 homolog [Brassica rapa]
							Bra033294	A10	3083285	3084319	-	B3 domain-containing transcription factor NGA3 [Brassica napus]
							Bra033293	A10	3095179	3102254	+	endoribonuclease Dicer homolog 1 isoform X1 [Brassica napus]
							Bra033292	A10	3102673	3103863	-	soluble inorganic pyrophosphatase 1 [Brassica napus]
							Bra033291	A10	3104989	3107793	-	PREDICTED: protein LHY isoform X2 [Brassica rapa]
							Bra033288	A10	3137283	3141012	+	hypothetical protein EUTSA_v10019170mg [Eutrema salsugineum]
							Bra033287	A10	3141617	3142356	-	PREDICTED: 28 kDa ribonucleoprotein, chloroplastic [Brassica rapa]
							Bra033286	A10	3142964	3144498	-	PREDICTED: pyruvate dehydrogenase E1 component subunit alpha-3, chloroplastic [Brassica rapa]
							Bra033285	A10	3145070	3146300	-	60S acidic ribosomal protein P1-3-like [Brassica napus]
							Bra033284	A10	3147203	3149429	+	PREDICTED: protein IQ-DOMAIN 1 [Brassica rapa]
							Bra033283	A10	3151263	3152852	-	3-ketoacyl-CoA synthase 1-like [Brassica napus]
							Bra033282	A10	3156305	3162338	-	PREDICTED: CBL-interacting serine..threonine-protein kinase 9 [Brassica rapa]
							Bra033281	A10	3166428	3167486	+	PREDICTED: GRF1-interacting factor 2 [Brassica rapa]
							Bra033280	A10	3167694	3168037	-	PREDICTED: uncharacterized protein LOC108857348 [Raphanus sativus]
							Bra033279	A10	3169719	3170585	+	uncharacterized protein LOC106370888 [Brassica napus]
							Bra033278	A10	3179966	3181647	-	PREDICTED: cytochrome P450 78A6 [Brassica rapa]
							Bra033277	A10	3193230	3194207	-	PREDICTED: ras-related protein RABA3 [Brassica rapa]
							Bra033276	A10	3196642	3197808	+	ORM1-like protein 3 [Brassica napus]
							Bra033275	A10	3199237	3200154	+	uncharacterized protein BNAA10G00630D [Brassica napus]
							Bra033274	A10	3202495	3203061	-	PREDICTED: ethylene-responsive transcription factor ERF023 [Brassica rapa]
							Bra033273	A10	3207482	3209236	+	PREDICTED: transcription factor bHLH13 [Brassica rapa]
							Bra033271	A10	3213400	3214845	+	PREDICTED: aspartyl protease family protein 2 [Brassica rapa]
							Bra033270	A10	3221100	3221819	+	PREDICTED: pathogenesis-related protein 1A-like [Brassica rapa]
							Bra033269	A10	3222490	3231031	-	PREDICTED: protein TSS [Brassica rapa]
							Bra033268	A10	3238963	3240160	+	PREDICTED: zinc finger CCCH domain-containing protein 1 [Brassica rapa]
							Bra033267	A10	3242888	3243713	+	PREDICTED: abscisic acid receptor PYL9 [Brassica rapa]
							Bra033266	A10	3252273	3254288	-	PREDICTED: UDP-glycosyltransferase 72B3 [Brassica rapa]
							Bra033265	A10	3255354	3256999	-	PREDICTED: protein trichome birefringence-like 25 [Brassica rapa]
							Bra033264	A10	3258661	3260666	-	PREDICTED: uncharacterized protein LOC103844648 isoform X1 [Brassica rapa]
							Bra033263	A10	3262749	3263570	-	PREDICTED: protein YLS9 [Brassica rapa]
							Bra033262	A10	3264853	3266840	+	PREDICTED: phosphatidylinositol 4-phosphate 5-kinase 10 [Brassica rapa]
							Bra033261	A10	3273906	3276464	+	PREDICTED: 1-aminocyclopropane-1-carboxylate synthase 2 [Raphanus sativus]
							Bra033260	A10	3279036	3280441	-	hypothetical protein AXX17_AT1G00560 [Arabidopsis thaliana]
							Bra033258	A10	3288307	3290823	+	PREDICTED: C-terminal binding protein AN [Brassica rapa]
							Bra033257	A10	3291640	3293102	+	protein REVEILLE 3-like [Brassica napus]
							Bra033255	A10	3303796	3305825	+	probable serine..threonine-protein kinase At1g01540 isoform X1 [Brassica napus]
							Bra033254	A10	3308013	3309065	+	protein BPS1, chloroplastic [Eutrema salsugineum]
							Bra033253	A10	3310607	3313012	+	PREDICTED: uncharacterized protein LOC103844660 [Brassica rapa]
							Bra033252	A10	3314674	3318194	+	ferric reduction oxidase 2-like isoform X2 [Brassica napus]
							Bra033251	A10	3335435	3337442	+	PREDICTED: cytochrome P450 86A4 [Brassica rapa]
							Bra033249	A10	3341798	3344134	-	PREDICTED: glycerol-3-phosphate 2-O-acyltransferase 4-like [Brassica rapa]
							Bra033248	A10	3345854	3346893	-	aquaporin PIP1-3-like [Brassica napus]
							Bra033247	A10	3349010	3350389	+	PREDICTED: random slug protein 5 [Brassica rapa]
							Bra033246	A10	3350770	3351399	-	PREDICTED: BTB..POZ domain-containing protein At1g01640 [Brassica rapa]
							Bra033245	A10	3352592	3355699	-	PREDICTED: signal peptide peptidase-like 4 isoform X1 [Brassica rapa]
							Bra033244	A10	3360431	3363061	-	PREDICTED: putative U-box domain-containing protein 55 [Camelina sativa]
							Bra033243	A10	3363397	3366437	-	PREDICTED: U-box domain-containing protein 56 isoform X1 [Brassica rapa]
							Bra033242	A10	3366774	3368219	-	PREDICTED: U-box domain-containing protein 54 [Brassica rapa]
							Bra033241	A10	3375098	3377466	+	PREDICTED: protein PAIR1 isoform X2 [Brassica rapa]
							Bra033240	A10	3379612	3383545	+	BnaC05g00380D [Brassica napus]
							Bra033239	A10	3386211	3387258	+	NAC-domain protein 18 [Brassica napus]
							Bra033238	A10	3390094	3390644	-	PREDICTED: uncharacterized protein LOC103844674 [Brassica rapa]
							Bra033237	A10	3391007	3393138	-	PREDICTED: probable serine..threonine-protein kinase At5g41260 isoform X1 [Brassica oleracea var. oleracea]
							Bra033236	A10	3394531	3395124	+	PREDICTED: actin-depolymerizing factor 10-like [Brassica oleracea var. oleracea]
							Bra033235	A10	3395616	3397394	-	PREDICTED: tRNA-specific adenosine deaminase 1 [Brassica rapa]
							Bra033233	A10	3402605	3403746	+	LIM domain-containing protein PLIM2b [Brassica napus]
							Bra033232	A10	3404685	3410079	+	K..+.. efflux antiporter 1, chloroplastic-like [Brassica napus]
							Bra033231	A10	3412856	3418361	+	K..+.. efflux antiporter 1, chloroplastic-like [Brassica napus]
							Bra033230	A10	3418941	3420671	+	PREDICTED: ..+..-neomenthol dehydrogenase isoform X1 [Brassica rapa]
							Bra033229	A10	3420897	3422732	-	PREDICTED: uncharacterized protein LOC103844682 [Brassica rapa]
							Bra033227	A10	3428071	3428535	+	PREDICTED: uncharacterized protein LOC103844685 [Brassica rapa]
							Bra033226	A10	3434025	3436599	+	PREDICTED: subtilisin-like protease SBT1.1 [Brassica rapa]
							Bra033225	A10	3437929	3442852	+	PREDICTED: phospholipase D beta 1 [Raphanus sativus]
							Bra033224	A10	3449611	3450891	+	PREDICTED: pentatricopeptide repeat-containing protein At1g01970 [Brassica rapa]
							Bra033223	A10	3451399	3452124	-	PREDICTED: uncharacterized protein LOC103844690 [Brassica rapa]
							Bra033222	A10	3455615	3469442	-	CCR4-NOT transcription complex subunit 1-like isoform X7 [Brassica napus]
	qPEW-3	A10	A10S14-A10S54	26.06-30.80	4.74	11806404-12390431	Bra008601	A10	11808083	11810620	-	PREDICTED: myosin-binding protein 3 isoform X1 [Brassica rapa]
							Bra008602	A10	11811755	11818308	-	PREDICTED: valine--tRNA ligase, chloroplastic..mitochondrial 2 [Brassica rapa]
							Bra008603	A10	11820798	11823016	-	PREDICTED: uncharacterized protein LOC108814495 [Raphanus sativus]
							Bra008604	A10	11829141	11834137	-	PREDICTED: origin of replication complex subunit 3 [Brassica rapa]
							Bra008605	A10	11836143	11841192	+	PREDICTED: uncharacterized protein LOC103846310 [Brassica rapa]
							Bra008606	A10	11841557	11842631	+	PREDICTED: uncharacterized protein LOC103846311 [Brassica rapa]
							Bra008607	A10	11843161	11844372	+	PREDICTED: uncharacterized protein LOC103846312 [Brassica rapa]
							Bra008608	A10	11852363	11855432	-	PREDICTED: protein TIC 40, chloroplastic [Brassica rapa]
							Bra008609	A10	11857997	11860723	+	uncharacterized protein LOC106371997 isoform X2 [Brassica napus]
							Bra008610	A10	11865307	11865894	-	PREDICTED: protein ODORANT1 [Brassica rapa]
							Bra008611	A10	11870454	11872457	-	probable inactive receptor kinase At5g16590 [Brassica napus]
							Bra008612	A10	11879112	11881686	+	PREDICTED: glutamine synthetase cytosolic isozyme 1-4-like [Brassica oleracea var. oleracea]
							Bra008613	A10	11896006	11900956	+	PREDICTED: transcription repressor KAN1-like [Brassica rapa]
							Bra008614	A10	11902567	11903499	-	PREDICTED: uncharacterized protein LOC103846322 [Brassica rapa]
							Bra008615	A10	11904275	11906331	-	auxin efflux carrier component 5 [Brassica napus]
							Bra008616	A10	11910649	11911695	-	PREDICTED: probable UDP-arabinopyranose mutase 5 [Glycine max]
							Bra008617	A10	11915947	11918648	+	PREDICTED: serine..threonine-protein kinase CDL1-like [Brassica oleracea var. oleracea]
							Bra008618	A10	11919418	11919675	+	BnaA03g48170D [Brassica napus]
							Bra008619	A10	11924084	11924725	+	BnaC09g41440D [Brassica napus]
							Bra008620	A10	11925662	11926992	+	PREDICTED: probable tyrosine-protein phosphatase At1g05000 isoform X2 [Brassica rapa]
							Bra008621	A10	11928028	11928339	-	PREDICTED: uncharacterized protein LOC103846331 [Brassica rapa]
							Bra008622	A10	11930505	11931335	+	PREDICTED: uncharacterized protein LOC103846332 [Brassica rapa]
							Bra008623	A10	11932296	11933287	+	PREDICTED: uncharacterized protein LOC103846333 [Brassica rapa]
							Bra008624	A10	11933617	11934972	-	PREDICTED: truncated FRIGIDA-like protein 1 [Brassica rapa]
							Bra008626	A10	11941674	11949096	+	PREDICTED: trafficking protein particle complex subunit 8 isoform X2 [Brassica rapa]
							Bra008627	A10	11951283	11952950	+	PREDICTED: uncharacterized protein LOC103846336 [Brassica rapa]
							Bra008628	A10	11955208	11960232	-	PREDICTED: sister chromatid cohesion 1 protein 4-like [Brassica rapa]
							Bra008629	A10	11961344	11965085	-	PREDICTED: splicing factor U2AF-associated protein 2 [Brassica rapa]
							Bra008630	A10	11965682	11966233	+	uncharacterized protein LOC106370516 [Brassica napus]
							Bra008631	A10	11966731	11969328	-	PREDICTED: stearoyl-[acyl-carrier-protein] 9-desaturase 1, chloroplastic [Camelina sativa]
							Bra008633	A10	11977876	11979896	+	PREDICTED: uncharacterized protein LOC103846345 [Brassica rapa]
							Bra008635	A10	11981668	11984237	+	PREDICTED: lisH domain and HEAT repeat-containing protein KIAA1468 homolog isoform X2 [Brassica rapa]
							Bra008636	A10	11985344	11985829	+	PREDICTED: uncharacterized protein LOC103846347 [Brassica rapa]
							Bra008638	A10	11991532	11994360	+	probable mannan synthase 11 [Brassica napus]
							Bra008639	A10	11995318	11996915	-	uncharacterized protein LOC106370519 [Brassica napus]
							Bra008640	A10	11997872	12000599	-	PREDICTED: plastidic glucose transporter 4 [Brassica rapa]
							Bra008642	A10	12007302	12008129	+	PREDICTED: uncharacterized protein LOC103846354 isoform X4 [Brassica rapa]
							Bra008643	A10	12008526	12009330	-	40S ribosomal protein S7-2 [Capsella rubella]
							Bra008644	A10	12010971	12012858	-	PREDICTED: caffeoylshikimate esterase isoform X1 [Brassica rapa]
							Bra008645	A10	12024149	12024829	+	PREDICTED: uncharacterized protein LOC103847525, partial [Brassica rapa]
							Bra008646	A10	12026620	12028467	+	PREDICTED: uncharacterized protein LOC103846356 [Brassica rapa]
							Bra008647	A10	12029040	12031146	+	PREDICTED: ubiquitin receptor RAD23d-like [Brassica rapa]
							Bra008649	A10	12037893	12040105	+	PREDICTED: ubiquitin receptor RAD23c-like [Brassica rapa]
							Bra008651	A10	12045539	12046537	+	PREDICTED: probable carboxylesterase 17 [Brassica rapa]
							Bra008652	A10	12049062	12052455	+	T-complex protein 1 subunit zeta 2 [Capsella rubella]
							Bra008653	A10	12052795	12053632	-	COX assembly mitochondrial protein 2 [Brassica napus]
							Bra008654	A10	12053992	12056540	+	PREDICTED: ultraviolet-B receptor UVR8 [Brassica rapa]
							Bra008655	A10	12056767	12059118	-	PREDICTED: myelin transcription factor 1 isoform X1 [Brassica rapa]
							Bra008656	A10	12065644	12068150	-	protein GAMETE EXPRESSED 3-like [Brassica napus]
							Bra008657	A10	12069308	12070218	-	PREDICTED: very-long-chain enoyl-CoA reductase [Brassica rapa]
							Bra008658	A10	12070873	12074386	-	PREDICTED: phenylalanine--tRNA ligase beta subunit, cytoplasmic-like [Raphanus sativus]
							Bra008660	A10	12086252	12088204	-	PREDICTED: pentatricopeptide repeat-containing protein At5g15980, mitochondrial [Brassica rapa]
							Bra008661	A10	12088938	12089553	-	stress-induced protein KIN2-like [Brassica napus]
							Bra008662	A10	12092826	12093932	-	S-adenosylmethionine decarboxylase proenzyme 2 [Brassica napus]
							Bra008663	A10	12098130	12100150	+	PREDICTED: protein trichome birefringence-like 19 [Brassica rapa]
							Bra008664	A10	12101010	12102444	+	PREDICTED: protein trichome birefringence-like 21 [Brassica rapa]
							Bra008665	A10	12102617	12104150	-	PREDICTED: LOW QUALITY PROTEIN: uncharacterized protein LOC103846374 [Brassica rapa]
							Bra008666	A10	12105946	12107168	+	protein trichome birefringence-like 21 [Brassica napus]
							Bra008667	A10	12108650	12111471	+	PREDICTED: probable endo-1,3..4..-beta-glucanase ARB_01444 [Brassica rapa]
							Bra008668	A10	12113439	12114452	+	PREDICTED: zinc finger protein CONSTANS-LIKE 1 [Brassica rapa]
							Bra008669	A10	12117648	12118929	+	constans [Brassica napus]
							Bra008670	A10	12121552	12122103	-	PREDICTED: basic leucine zipper 43 [Brassica rapa]
							Bra008671	A10	12131124	12131987	-	PREDICTED: probable E3 ubiquitin-protein ligase RHC2A [Brassica rapa]
							Bra008673	A10	12137956	12138881	+	PREDICTED: uncharacterized protein LOC106316330 [Brassica oleracea var. oleracea]
							Bra008674	A10	12141924	12144009	+	PREDICTED: developmental protein SEPALLATA 1 [Brassica rapa]
							Bra008675	A10	12144624	12145603	-	PREDICTED: E3 ubiquitin-protein ligase At3g02290 [Brassica rapa]
							Bra008676	A10	12148350	12149514	+	PREDICTED: WAS..WASL-interacting protein family member 3 [Brassica rapa]
							Bra008677	A10	12150020	12150502	+	PREDICTED: glucosamine 6-phosphate N-acetyltransferase [Brassica rapa]
							Bra008678	A10	12150618	12151684	-	PREDICTED: 30S ribosomal protein 3-2, chloroplastic [Brassica rapa]
							Bra008679	A10	12159433	12161529	+	PREDICTED: uncharacterized protein At1g04910 [Brassica rapa]
							Bra008680	A10	12162887	12164433	-	PREDICTED: calcium..calmodulin-regulated receptor-like kinase 2 [Brassica rapa]
							Bra008681	A10	12167850	12174542	+	PREDICTED: LOW QUALITY PROTEIN: DNA-directed RNA polymerase 2, chloroplastic..mitochondrial [Brassica oleracea var. oleracea]
							Bra008682	A10	12174817	12175974	-	PREDICTED: putative F-box protein At5g15660 [Brassica rapa]
							Bra008683	A10	12178755	12180214	-	reversibly glycosylated polypeptide-2 [Arabidopsis thaliana]
							Bra008684	A10	12184431	12186358	-	PREDICTED: COBRA-like protein 4 [Brassica rapa]
							Bra008685	A10	12187836	12188300	-	protein SPIRAL1-like 4 [Eutrema salsugineum]
							Bra008686	A10	12189772	12190620	+	PREDICTED: uncharacterized protein LOC103846399 [Brassica rapa]
							Bra008688	A10	12195637	12196453	-	PREDICTED: thaumatin-like protein 1 [Brassica rapa]
							Bra008689	A10	12204641	12207873	+	PREDICTED: protein LONGIFOLIA 1-like [Brassica rapa]
							Bra008690	A10	12208629	12209717	-	PREDICTED: transcription initiation factor TFIID subunit 8-like [Brassica rapa]
							Bra008691	A10	12210472	12213131	+	PREDICTED: ribosome biogenesis protein WDR12 homolog [Brassica rapa]
							Bra008692	A10	12214835	12217565	+	PREDICTED: uncharacterized protein LOC103846404 [Brassica rapa]
							Bra008694	A10	12230067	12231710	-	PREDICTED: biotin carboxyl carrier protein of acetyl-CoA carboxylase 2, chloroplastic-like [Brassica rapa]
							Bra008695	A10	12235820	12237262	+	PREDICTED: UDP-glucose 6-dehydrogenase 2 isoform X2 [Tarenaya hassleriana]
							Bra008696	A10	12238773	12241078	+	PREDICTED: probable galacturonosyltransferase 14 isoform X1 [Brassica rapa]
							Bra008698	A10	12246356	12250042	+	chaperone protein ClpB3, chloroplastic-like [Brassica napus]
							Bra008699	A10	12252329	12255245	+	PREDICTED: cyclic nucleotide-gated ion channel 2 [Brassica rapa]
							Bra008700	A10	12257412	12262539	+	PREDICTED: probable ubiquitin conjugation factor E4 [Brassica rapa]
							Bra008701	A10	12262910	12264331	-	PREDICTED: uncharacterized protein LOC103846415 isoform X2 [Brassica rapa]
							Bra008702	A10	12272033	12273395	-	SPX domain-containing protein 4-like [Brassica napus]
							Bra008703	A10	12274452	12278665	-	cystathionine gamma-synthase 1, chloroplastic-like [Brassica napus]
							Bra008704	A10	12281970	12282449	-	uncharacterized protein BNAA03G05380D [Brassica napus]
							Bra008705	A10	12284471	12285635	-	PREDICTED: myb-related protein Hv1 [Brassica rapa]
							Bra008706	A10	12294022	12295635	+	PREDICTED: pentatricopeptide repeat-containing protein At5g15300 [Brassica rapa]
							Bra008707	A10	12298257	12298552	-	PREDICTED: transcription factor bHLH77-like [Brassica oleracea var. oleracea]
							Bra008708	A10	12299414	12300179	-	PREDICTED: casparian strip membrane protein 5 [Brassica rapa]
							Bra008709	A10	12303129	12304988	-	PREDICTED: KH domain-containing protein HEN4 [Brassica rapa]
							Bra008710	A10	12309614	12310216	+	uncharacterized protein At5g19025-like [Brassica napus]
							Bra008711	A10	12311056	12317152	+	PREDICTED: ATP-dependent zinc metalloprotease FTSH 6, chloroplastic [Brassica rapa]
							Bra008712	A10	12318367	12319158	+	PREDICTED: zinc-finger homeodomain protein 8 [Brassica rapa]
							Bra008713	A10	12319951	12320841	+	PREDICTED: 40S ribosomal protein S9-1 [Raphanus sativus]
							Bra008714	A10	12322877	12323413	+	uncharacterized protein LOC106372136 [Brassica napus]
							Bra008715	A10	12323822	12326915	-	peroxidase 56 [Brassica napus]
							Bra008716	A10	12331666	12332739	+	PREDICTED: transcription factor PRE2 [Brassica rapa]
							Bra008717	A10	12349232	12350742	+	PREDICTED: homeobox-leucine zipper protein HAT7-like [Brassica rapa]
							Bra008718	A10	12355841	12358698	-	aldose 1-epimerase-like [Brassica napus]
							Bra008719	A10	12359215	12361642	-	probable WRKY transcription factor 72 [Brassica napus]
							Bra008720	A10	12367953	12369975	-	plant cysteine oxidase 1-like isoform X2 [Brassica napus]
							Bra008721	A10	12374774	12376581	-	probable pectate lyase 19 [Brassica napus]
							Bra008722	A10	12378475	12380406	+	PREDICTED: auxin efflux carrier component 8-like [Brassica rapa]
							Bra008723	A10	12381266	12382735	+	hypothetical protein EUTSA_v10014354mg [Eutrema salsugineum]
							Bra008724	A10	12383384	12383894	-	BnaA10g29760D [Brassica napus]
							Bra008725	A10	12384468	12385676	+	PREDICTED: MATH domain and coiled-coil domain-containing protein At2g42460-like [Brassica rapa]
	qMLL-6, qHH-6	A10	A10S24-A10S23	74.85-77.18	-2.33	3458392-3481119	Bra033221	A10	3480530	3482147	-	PREDICTED: squamosa promoter-binding-like protein 8 [Brassica rapa]
							Bra033222	A10	3455615	3469442	-	PREDICTED: NOT1 [Brassica rapa]
